1  
2  
3  
4  
5  
6  
7  
8  
9  
10  
11  
12  
13  
14  
15  
16  
17  
18  
19  
20  
21  
22  
23  
24  
25  
26  
27  
28  
29  
30  
31  
32  
33  
34  
35  
36  
37  
38  
39  
40  
41

## Regulation of protein abundance in genetically diverse mouse populations

Gregory R. Keele<sup>1\*</sup>, Tian Zhang<sup>2\*</sup>, Duy T. Pham<sup>1</sup>, Matthew Vincent<sup>1</sup>, Timothy A. Bell<sup>3</sup>, Pablo Hock<sup>3</sup>, Ginger D. Shaw<sup>3</sup>, Steven C. Munger<sup>1</sup>, Fernando Pardo-Manuel de Villena<sup>3,4</sup>, Martin T. Ferris<sup>3</sup>, Steven P. Gygi<sup>2</sup>, Gary A. Churchill<sup>1</sup>

<sup>1</sup>The Jackson Laboratory, Bar Harbor, ME 04609, USA

<sup>2</sup>Harvard Medical School, Boston, MA 02115, USA

<sup>3</sup>Department of Genetics, University of North Carolina, Chapel Hill, NC 27599, USA

<sup>4</sup>Lineberger Comprehensive Cancer Center, University of North Carolina, Chapel Hill, NC 27599, USA

\*Authors contributed equally

**Corresponding author:** gary.churchill@jax.org

### Abstract

Proteins constitute much of the structure and functional machinery of cells, forming signaling networks, metabolic pathways, and large multi-component complexes. Protein abundance is regulated at multiple levels spanning transcription, translation, recycling, and degradation to maintain proper balance and optimal function. To better understand how protein abundances are maintained across varying genetic backgrounds, we analyzed liver proteomes of three genetically diverse mouse populations. We observe strong concordance of genetic and sex effects across populations. Differences between the populations arise from the contributions of additive, dominance, and epistatic components of heritable variation. We find that the influence of genetic variation on proteins that form complexes relates to their co-abundance. We identify effects on protein abundance from mutations that arose and became fixed during breeding and can lead to unique regulatory responses and disease states. Genetically diverse mouse populations provide powerful tools for understanding proteome regulation and its relationship to whole-organism phenotypes.

### Key words

proteomics, protein complex, systems genetics, pQTL, Collaborative Cross, Diversity Outbred, inbred strains

## 42 INTRODUCTION

43 Protein abundance is regulated at multiple levels spanning transcription, translation, recycling,  
44 and degradation. It is responsive to genetic variation, as observed in yeast (Picotti et al., 2013),  
45 mice (Chick et al., 2016; Williams et al., 2016; Wu et al., 2014), and human cell lines, tissues,  
46 and populations (Battle et al., 2015; He et al., 2020; Liu et al., 2015; Suhre et al., 2020). Genetic  
47 effects on protein abundance can be broadly divided into two classes. Local variants occur in  
48 the vicinity of the coding gene and commonly affect protein abundance by altering the rate of  
49 transcription or stability of the transcript (Pai et al., 2012). In contrast, distal genetic variants  
50 are found at loci far from the coding gene and their effects on protein abundance are often  
51 post-translational and conferred via a diffusible intermediate; often another protein. Within  
52 these categories, multiple modes of regulation are possible (Chick et al., 2016). The complexity  
53 of genetic regulation is compounded for proteins that are members of complexes where  
54 stoichiometry imposes varying degrees of constraint (Chick et al., 2016; Huttlin et al., 2020;  
55 Romanov et al., 2019; Szklarczyk et al., 2019; Taggart et al., 2020). The number of genetic loci  
56 that affect a protein can range from a single locus (monogenic) to many (multi-genic to  
57 polygenic). Their individual effects can be additive or dominant/recessive, thus dependent on  
58 the extent of heterozygosity in the population. Loci can also interact, resulting in epistatic  
59 effects.

60 Resource populations with high levels of genetic diversity can help to identify and characterize  
61 the genetic loci that affect protein abundance. The Collaborative Cross (CC) (Churchill et al.,  
62 2004; Collaborative Cross Consortium, 2012) and Diversity Outbred (DO) (Churchill et al., 2012)  
63 mouse populations are powerful tools for genetic analysis. They are descended from a common  
64 set of eight inbred strains (*i.e.*, the founder strains), representing three subspecies of the house  
65 mouse, *Mus musculus* (Yang et al., 2007, 2011) and encompass genetic variation from across  
66 laboratory and wild mice. DO mice are available in large numbers and each individual possesses  
67 a unique, highly recombinant and heterozygous genome, supporting powerful, fine resolution  
68 mapping of genetic variants (*e.g.*, Svenson *et al.* 2012; French *et al.* 2015; Keller *et al.* 2018,  
69 2019). The CC consists of ~60-70 strains that are largely inbred, with many strains homozygous  
70 at most loci (>99%), and residual heterozygous regions known and characterized (Collaborative  
71 Cross Consortium, 2012; Shorter et al., 2019; Srivastava et al., 2017). Due to fewer outbreeding  
72 generations than in the DO, the CC possess larger linkage disequilibrium (LD) blocks. The  
73 reproducible genomes of CC strains enable replicate study designs (Mosedale *et al.* 2017, 2019)  
74 and the characterization of genetic effects on strain-specific phenotypes (Philip *et al.* 2011;  
75 McMullan *et al.* 2016). CC strains can serve as models for human diseases including colitis  
76 (Rogala et al., 2014), susceptibility to Ebola infection (Rasmussen et al., 2014), influenza A virus  
77 (Noll et al., 2020), SARS-coronavirus (Gralinski et al., 2015), and peanut allergy (Orgel et al.,  
78 2019).

79 In this work, we obtained multiplexed mass spectrometry (mass-spec) quantification of proteins  
80 in liver samples of 116 CC mice representing female/male pairs from 58 strains. We previously  
81 collected proteomics data from the livers of 192 DO mice and 32 mice representing the eight  
82 founder strains (two animals of each sex per founder strain) (Chick et al., 2016) (**Figure 1a**). We  
83 map protein quantitative trait loci (pQTL) in both the CC and DO and find consistency of the  
84 genetic and sex effects on protein abundance across the populations. We characterize the  
85 genetic architecture of protein-complexes in both the CC and DO, and find that complexes with  
86 highly co-abundant members are heritable and exhibit non-additive and/or highly polygenic  
87 genetic architecture, which is more apparent in the CC. Finally, we identify genetic variants that  
88 originated and became fixed during the of the CC and contribute to CC strain-specific  
89 phenotypes. Our work demonstrates the complementary strengths of these genetic resources  
90 and offers new insights into the genetic regulation of protein abundance.

91

## 92 **RESULTS**

### 93 **Genetic effects on proteins are shared across the CC, DO, and founder strains**

94 We quantified the abundance of 6,779 proteins in liver tissue from 58 inbred CC strains, one  
95 female and male per strain. We previously reported quantification of proteins from liver tissue  
96 of 192 outbred DO mice and 32 mice representing the eight founder strains (two per sex per  
97 strain) (Chick et al., 2016). The data for DO and founder strains were re-analyzed for this study  
98 to ensure that all data were processed consistently (**Methods**), resulting in the quantification of  
99 6,588 and 6,950 proteins, respectively. From the 9,226 total proteins detected, 4,434 were  
100 observed in all three populations (**Figure 1b**; **Table S1**).

101 We estimated protein abundance heritability ( $h^2$ ), which reflects the combined effects of  
102 genetic variants, their allele frequencies, and the large-scale genetic background (*e.g.*, inbred or  
103 outbred) of each population (**Figure 1c**). Heritability estimates were highest in the CC and  
104 founder strains, due to capturing variation from non-additive genetic effects (*i.e.*, recessive and  
105 epistatic) in inbred strains. Heritability estimates in the DO are limited to additive genetic  
106 factors (narrow sense heritability; Lynch and Walsh 1998) that are captured in the genetic  
107 relatedness of our sample. Heritability estimates were significantly correlated across  
108 populations ( $r > 0.4$ ,  $p < 2.2e-16$ ), suggesting that much of the controlling genetic variation is  
109 conserved across populations.

110 In order to identify the genetic loci that drive variation in protein abundance, we carried out  
111 protein quantitative trait locus (pQTL) mapping in the CC and DO (**Table S2**). To determine  
112 significant pQTL, we first applied a permutation analysis (Doerge and Churchill, 1996) to control  
113 genome-wide error rate for each protein and then applied a false discovery rate adjustment  
114 (FDR < 0.1) across proteins (Chesler et al., 2005) to establish a stringent detection threshold for  
115 pQTL. Using this criterion, we identified 1,199 local and 289 distal pQTL in the CC and 1,652

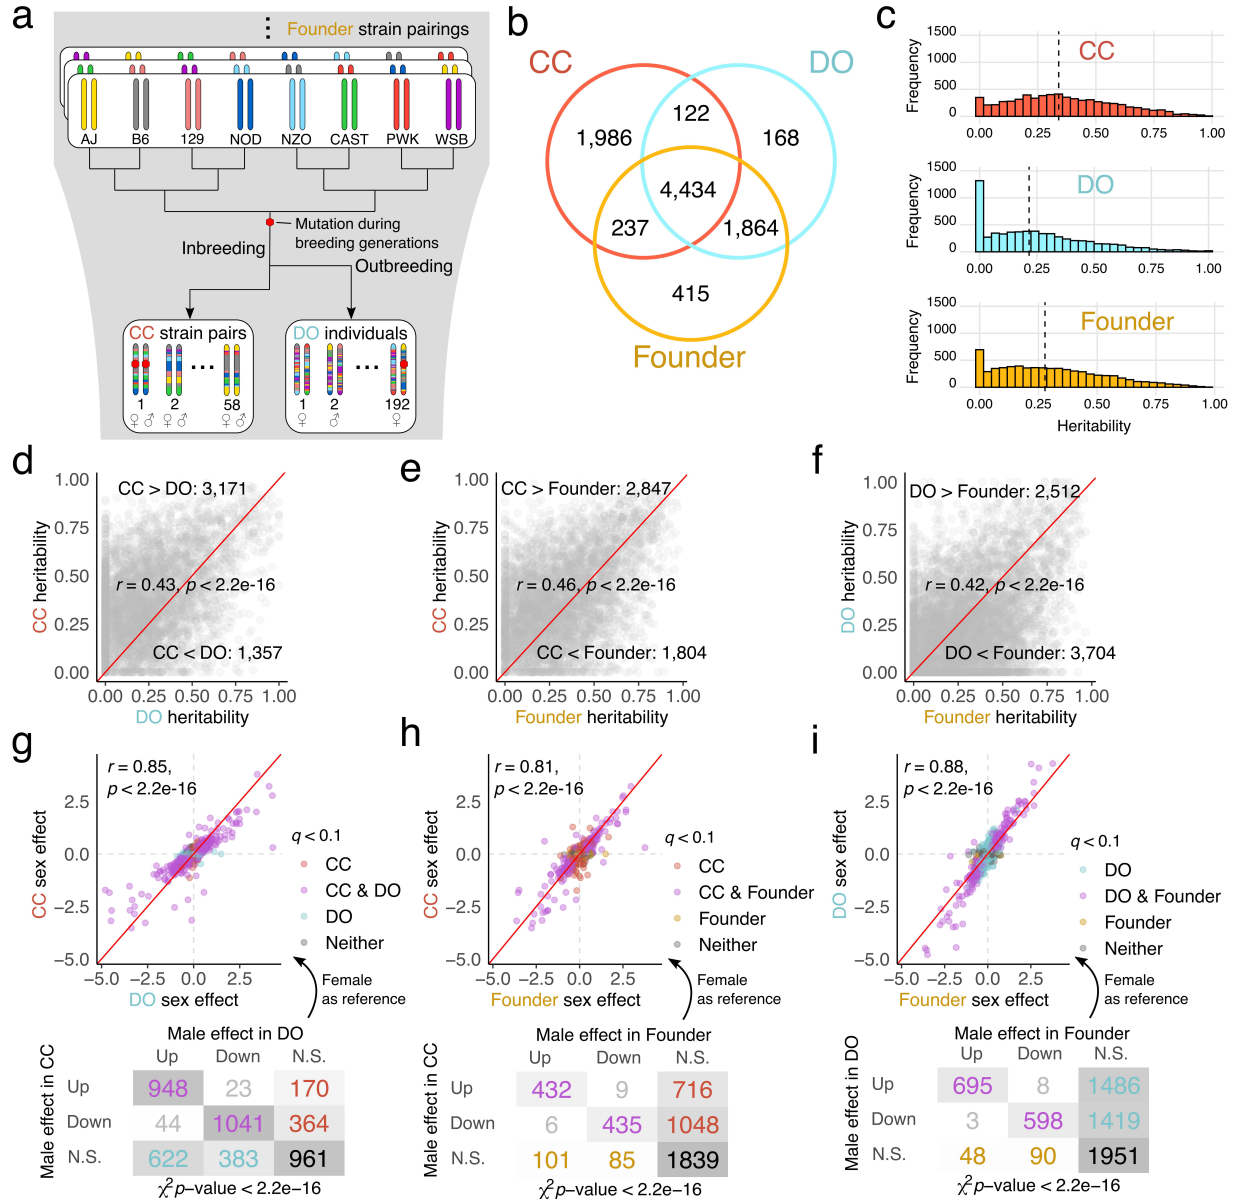

116  
117  
118 **Figure 1. Comparisons of genetic and sex effects on protein abundance among the CC, DO, and founder strains reveal strong**  
119 **concordance.** (a) The CC strains and DO mice are descended from the same eight inbred founder strains. Mutations occur  
120 during the breeding generations of the CC and DO and can become fixed in the CC, allowing their effects to be characterized. (b)  
121 Venn diagram of the analyzed proteins in the CC, DO, and founder strains. The founder strains and DO samples were from a  
122 joint experiment with the same protein annotations, resulting in greater overlap. (c) Overall genetic regulation, measured as  
123 heritability, is greater in the inbred CC and founder strains, reflecting contributions from non-additive genetic effects. Dashed  
124 vertical lines represent the median heritability in each population. Comparisons of the heritability of individual protein  
125 abundance for (d) CC and DO, (e) CC and founder strains, and (f) DO and founder strains. The correlation in heritability is high  
126 and significant regardless of which populations are being compared ( $r > 0.42$ ,  $p < 2.2e-16$ ). Heritability estimates in the CC are  
127 higher in part due to inclusion of a bridge sample across the batches of mass-spec experiments, which improved quantification  
128 accuracy (**Methods**). Red diagonal lines included for reference. Comparisons of the sex effects (with female as the reference) on  
129 individual protein abundance for (g) CC and DO, (h) CC and founder strains, and (i) DO and founder strains. N.S. indicates  
130 proteins that did not have significant sex effects. Sex effects are even more strongly correlated than heritability ( $r > 0.81$ ,  $p <$   
131  $2.2e-16$ ). Red diagonal lines included for reference. A breakdown of the number of proteins with significant sex effects and their  
direction is shown for each comparison of populations.

132 local and 382 distal pQTL in the DO (**Figure 2a & b**), where local is defined as when the pQTL is  
133 located within 10 Mbp of the midpoint of the protein-coding gene. We also identified a local  
134 pQTL on the mitochondrial genome in the CC for *mt-Nd1* (**Figure S1d**). In order to prevent the  
135 exclusion of true pQTL due to overly stringent control of false positive and accurately compare  
136 pQTL discovery across populations, we carried out a parallel analysis with more lenient FDR  
137 control (FDR < 0.5; **Figure S1a & b**).

138 We next restricted the set of proteins to the 4,556 that were detected and analyzed in both  
139 populations in order to compare genetic effects between the CC and DO. (**Figure 2c**). Among  
140 1,441 local pQTL stringently detected for the shared proteins, 639 were detected in both  
141 populations (**Figure 2d**). To determine if these local pQTL were driven by the same genetic  
142 variants, we compared the estimated haplotype effects at each pQTL (**Methods**) and found that  
143 622 (97.3%) were significantly positively correlated (**Figure 2e; Table S3**). To assess whether  
144 pQTL detected in only one population are population-specific or fell below the detection  
145 threshold in the other population but are likely driven by the same genetic variation, we  
146 compared the haplotype effects of detected pQTL to effects estimated at the corresponding  
147 locus in the other population, finding that 1,239 (86.0%) were significantly positively correlated.  
148 This trend for local pQTL holds true for lenient detection (**Figure S1f & g; Table S3**), indicating  
149 that local genetic effects on proteins are highly conserved between the CC and DO populations,  
150 even when failing to pass the threshold of detection in one of the populations.

151 The founder strains provide additional support for local pQTL in the CC and DO (**Figure S1k-n**),  
152 particularly for those that are challenging to detect due to rare alleles in the CC or DO (*e.g.*, a  
153 founder allele observed in three or fewer CC strains). We selected all genes with rare local  
154 founder alleles that did not have a leniently detected pQTL in the CC, representing 2,410 genes.  
155 We correlated the haplotype effects estimated at the locus closest to the gene transcription  
156 start sites (TSS) with the protein abundance in the founders (**Methods**) and found significant  
157 positive correlation for 196 genes, such as *Cyp2j5*. The conservation of local genetic effects  
158 among the founder strains, CC, and DO can be striking (such as in *Gosr2* and *Cyp2d22*; **Figure**  
159 **S2**). The three populations together identify a more complete catalog of local pQTL than any  
160 one alone. In total we find evidence to support local genetic effects on abundance for 3,004  
161 proteins observed across the CC and DO.

162 Of the 183 distal pQTL stringently detected in the CC and 278 in the DO for the shared set of  
163 proteins, we found 19 that were stringently detected in both populations. All 19 also had  
164 significantly correlated haplotype effects (**Figure 2h; Table S3**). Overall, the distal pQTL are  
165 weaker than the local pQTL (*e.g.*, Chick *et al.* 2016; Albert *et al.* 2018) which may contribute to  
166 an increased rate of false negative findings. By comparing haplotype effects for pQTL that were  
167 only stringently detected in only one population, we identified an additional 45 shared distal  
168 pQTL between the CC and DO populations (**Figure 2i; Table S3**).

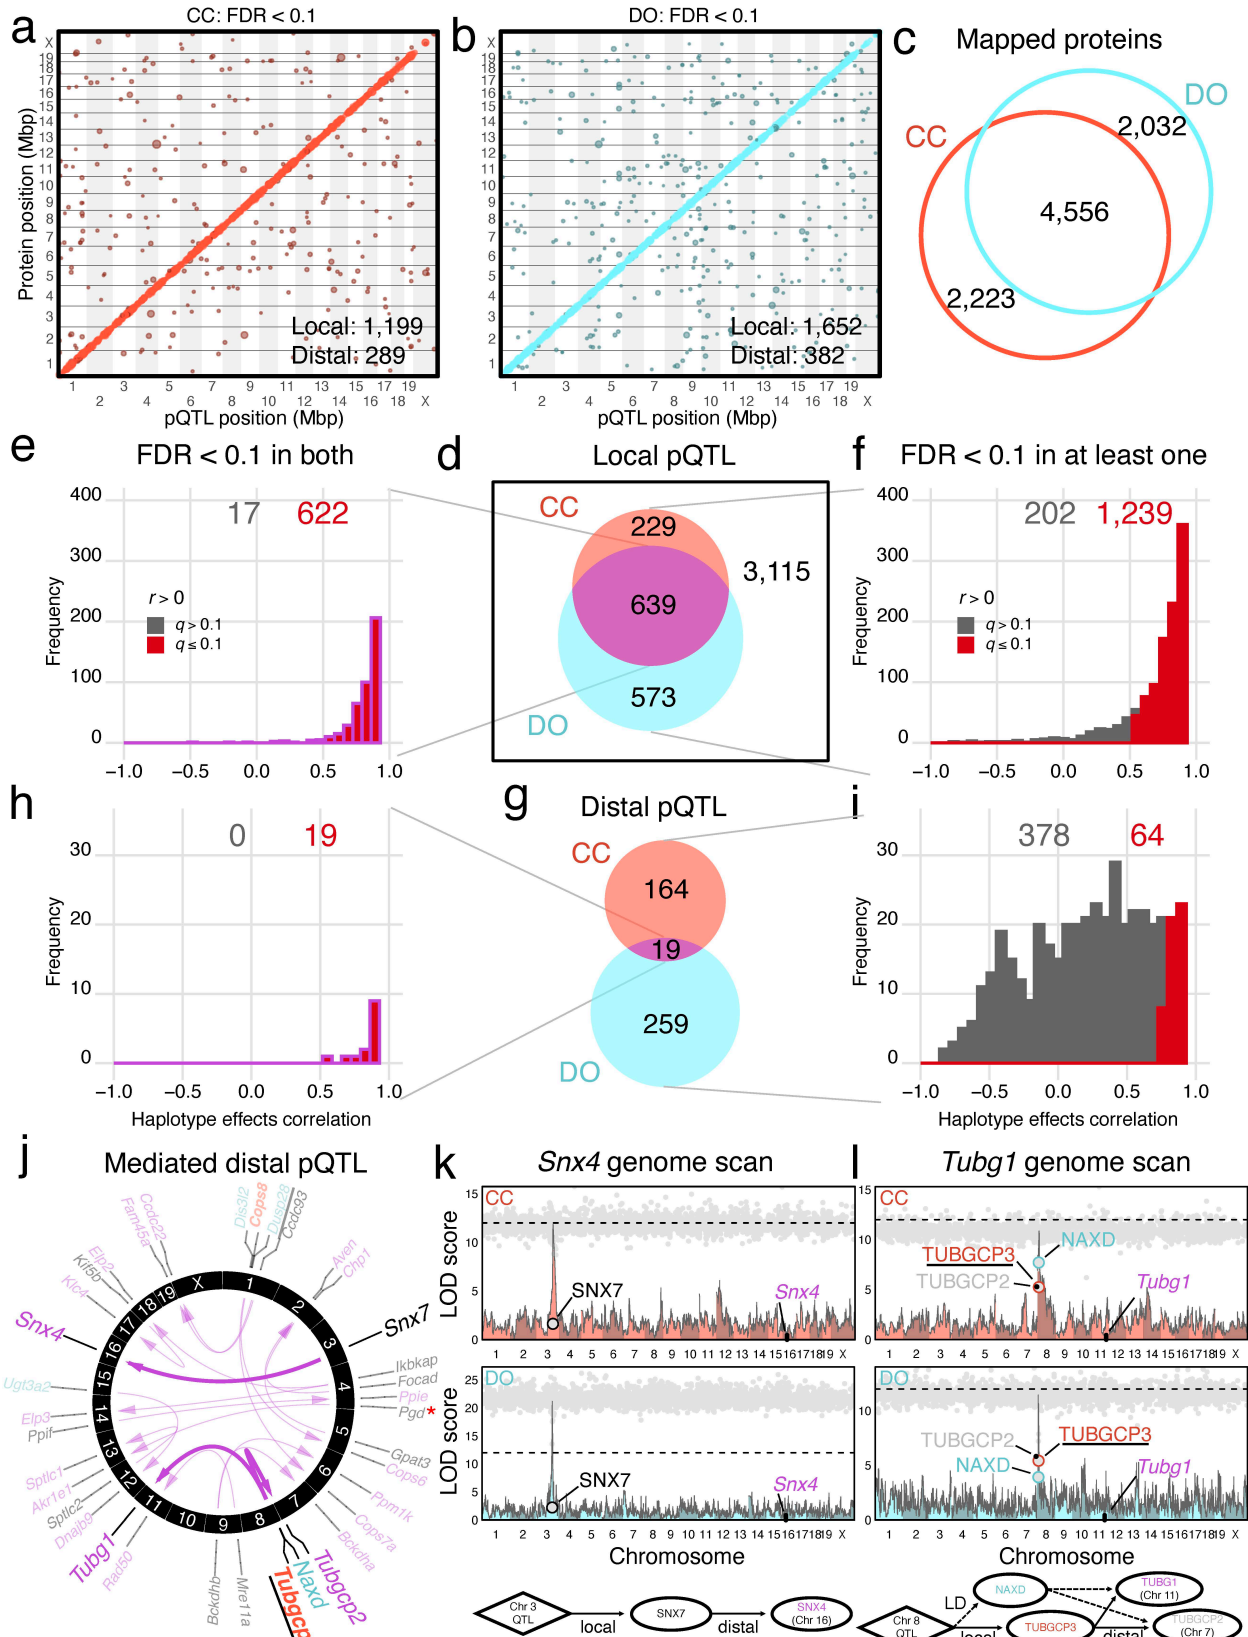

169  
170  
171

**Figure 2. Genetic effects of loci are highly consistent between the CC and DO.** Stringently detected pQTL (FDR < 0.1) in the (a) CC and (b) DO. The pQTL are plotted by the genomic positions of proteins against pQTL coordinates. Dot size is proportional to

172 strength of association (LOD score). (c) Venn diagram of overlap of analyzed proteins for the CC and DO. (d) Venn diagram of  
173 overlap of local pQTL detected in the CC and DO. (e) The haplotype effects of local pQTL detected in both populations are highly  
174 consistent, as measured by the correlation coefficient comparing the effects in the CC and DO. (f) More local pQTL have  
175 consistent effects between the populations when also considering pQTL detected in only one of them. Red bars represent the  
176 number of pQTL that had significantly correlated effects ( $FDR < 0.1$ ). (g) Venn diagram of overlap of distal pQTL detected in the  
177 CC and DO. (h) All 19 distal pQTL detected in both populations have consistent haplotype effects. (i) Considering distal pQTL  
178 detected in either of the populations resulted in 64 with correlated effects in the other population. (j) Circos plot of the 19  
179 distal pQTL detected in both CC and DO. Arrows connect candidate drivers identified through mediation analysis to their targets  
180 (proteins with distal pQTL). Gene names in black represent the top candidates identified in both the CC and DO, whereas red  
181 and blue gene names were specific to the CC or DO, respectively. For candidate mediators that do not match between the CC  
182 and DO, the stronger candidate based on shared membership in protein families is underlined. The red asterisk denotes *Pgd* as  
183 a likely false positive protein mediator, observed in both the CC and DO. Examples of mediation agreement (*Snx4*) and  
184 disagreement (*Tubg1*) between the CC and DO are highlighted, with overlaid pQTL and mediation scans. Gray dots represent  
185 mediation scores for individual proteins. A strong mediator is local to the pQTL and has a steep drop from the peak LOD score.  
186 (k) *SNX7* was detected as the driver of the *Snx4* distal pQTL in both the CC and DO. (l) *TUBGCP3* was identified as the best  
187 candidate driver for the *Tubg1* distal pQTL in the CC, and *NAXD* as the third-best mediator; however, in the DO, *NAXD* was the  
188 stronger mediator. *Tubgcp3*, as well as *Tubg1* and *Tubgcp2*, are members of the tubulin superfamily, providing further support  
189 for *TUBGCP3* as the stronger candidate driver of the distal pQTL of *Tubg1* and *Tubgcp2*. Horizontal dashed lines at LOD of 12  
190 included for reference. Lenient mapping results ( $FDR < 0.5$ ) further support the consistency of genetic regulation between the  
191 CC and DO (**Figure S1**).

192 The genetic variants that drive distal pQTL are generally thought to act through diffusible  
193 intermediates, one or more of which are under local genetic control by the same variants. We  
194 used mediation analysis (Baron and Kenny 1986; MacKinnon *et al.* 2007), adapted for the DO  
195 (Chick *et al.* 2016; Keller *et al.* 2018) and CC (Keele *et al.*, 2020), to identify candidate drivers of  
196 distal pQTL (**Methods; Table S4**). Mediation analysis can provide support for one or more  
197 candidate mediators for a pQTL. Furthermore, alternative candidates cannot be ruled out if  
198 they unobserved, such as proteins that failed to be detected by mass-spec or functional non-  
199 coding RNA. We identified candidate mediators for each of the 19 shared distal pQTL (**Figure**  
200 **2j**). The same mediator was identified in the CC and DO for 14 of these – we note that *BCKDHB*,  
201 *CCDC93*, and *IKBKAP* are each candidate mediators of the distal pQTL for two proteins (*CCDC93*  
202 for *Ccdc22* and *Fam45a*, *BCKDHB* for *Bckdha* and *Ppm1k* for, and *IKBKAP* for *Elp2* and *Elp3*). For  
203 four of the 19 distal pQTL, the best candidate mediator was different for the CC and DO. For  
204 example, *TUBGCP3* is the strongest mediator of distal pQTL of *Tubg1* and *Tubgcp2* in the CC but  
205 *NAXD* is the strongest mediator in the DO (**Figure 2l**). Given that *Tubg1*, *Tubgcp2*, and *Tubgcp3*  
206 are all members of the tubulin superfamily, *TUBGCP3* is a stronger candidate based on  
207 functional overlap. A true mediator should possess a local pQTL that co-localizes with the distal  
208 pQTL. Notably, the local pQTL for *Naxd* is much stronger in comparison to the local pQTL of  
209 *Tubgcp3* in the DO ( $LOD_{Naxd} = 40.2$  compared to  $LOD_{Tubgcp3} = 11.0$ ) whereas in the CC, they are  
210 more comparable ( $LOD_{Naxd} = 9.7$  compared to  $LOD_{Tubgcp3} = 7.9$ ). The local pQTL of *Naxd* in the  
211 DO may be acting as a surrogate for the local genotype, and thus outperforming *TUBGCP3*.  
212 Similarly, *COPS8* is the strongest mediator for distal pQTL of *Cops6* and *Cops7a* in the CC,  
213 whereas in the DO, *COPS8* was not detected as a mediator and notably did not have a local  
214 pQTL (even leniently detected) in the DO, suggesting that *COPS8* may be less accurately  
215 measured in our DO sample population. The final case of discordance was for the distal pQTL of

216 *Dnajb9*, for which UGT3A2 was identified as a mediator in the DO whereas no candidate was  
217 found in the CC. *Ugt3a2* possesses local pQTL in both the CC and DO, which is notably strong in  
218 the DO ( $LOD_{Ugt3a2} = 36.9$ ), suggesting it may be a false positive mediator in the DO and the true  
219 mediator was unobserved for both populations. We considered all distal pQTL that were  
220 stringently detected ( $FDR < 0.1$ ) in one of the populations, and evaluated the corresponding  
221 pQTL status (stringent, lenient, or not detected) and mediation status (*e.g.*, same or different  
222 mediator) in the other population (**Figure S1o**), which revealed similar levels of concordance in  
223 mediation for pQTL detected in only one of the populations.

224 When we expand our pQTL comparisons to include all leniently detected pQTL, 1,462 proteins  
225 have significantly correlated local pQTL (223 more than with stringent detection in one  
226 population; **Figure S1g**). In contrast, fewer distal pQTL with significantly correlated effects are  
227 detected (22 compared to 64) (**Figure S1j**). Some pQTL that fail to meet the stringent threshold  
228 in either population still replicate across the CC and DO, as is the case for 12 of the 41 proteins  
229 with distal pQTL and correlated haplotype effects (**Figure S1i**). One interesting example is *Erc3*  
230 (**Figure S3**), which has distal pQTL near a region on chromosome 7 that contains *Gtf2h1* and  
231 *Erc2*, which all strongly associate with each other based on protein-protein interactions  
232 (Bioplex; Huttlin *et al.* 2020) and exhibit consistent but more extreme pQTL effects in the CC  
233 compared to the DO.

234

### 235 **Sex effects on protein abundance are extensively shared across populations**

236 Protein abundances can differ between sexes (Chick *et al.*, 2016), and this pattern can extend  
237 collectively to protein complexes (Romanov *et al.*, 2019). We characterized sex effects in the  
238 CC, DO, and founder strains (**Methods; Table S1**). Significant sex effects ( $FDR < 0.1$ ) were  
239 detected for 3,721 (54.9%) proteins in the CC, 4,376 (66.4%) proteins in the DO, and 1,549  
240 (22.3%) proteins in the founder strains. The differences between male and female were  
241 overwhelmingly in the same direction for all populations (**Figure 1g-i**). Gene set enrichment  
242 analysis revealed that proteins related to ribosomes, translation, and protein transport gene  
243 ontology (GO) terms were more abundant in male livers whereas proteins related to catabolic  
244 and metabolic processes, including fatty acid metabolism, were more abundant in female livers  
245 in all populations.

246

### 247 **Drivers of variation in the abundance of protein-complexes**

248 Members of protein-complexes exhibit varying degrees of co-abundance, with some groups of  
249 proteins being tightly co-abundant, *i.e.*, correlated, and others less so (Romanov *et al.*, 2019).  
250 Correlation between members of a complex suggests some degree of co-regulation. We found  
251 that individual protein members of annotated protein-complexes (Giurgiu *et al.*, 2019; Ori *et al.*,  
252 2016; Vinayagam *et al.*, 2013; **Table S5**) are less heritable and fewer of them possess pQTL than



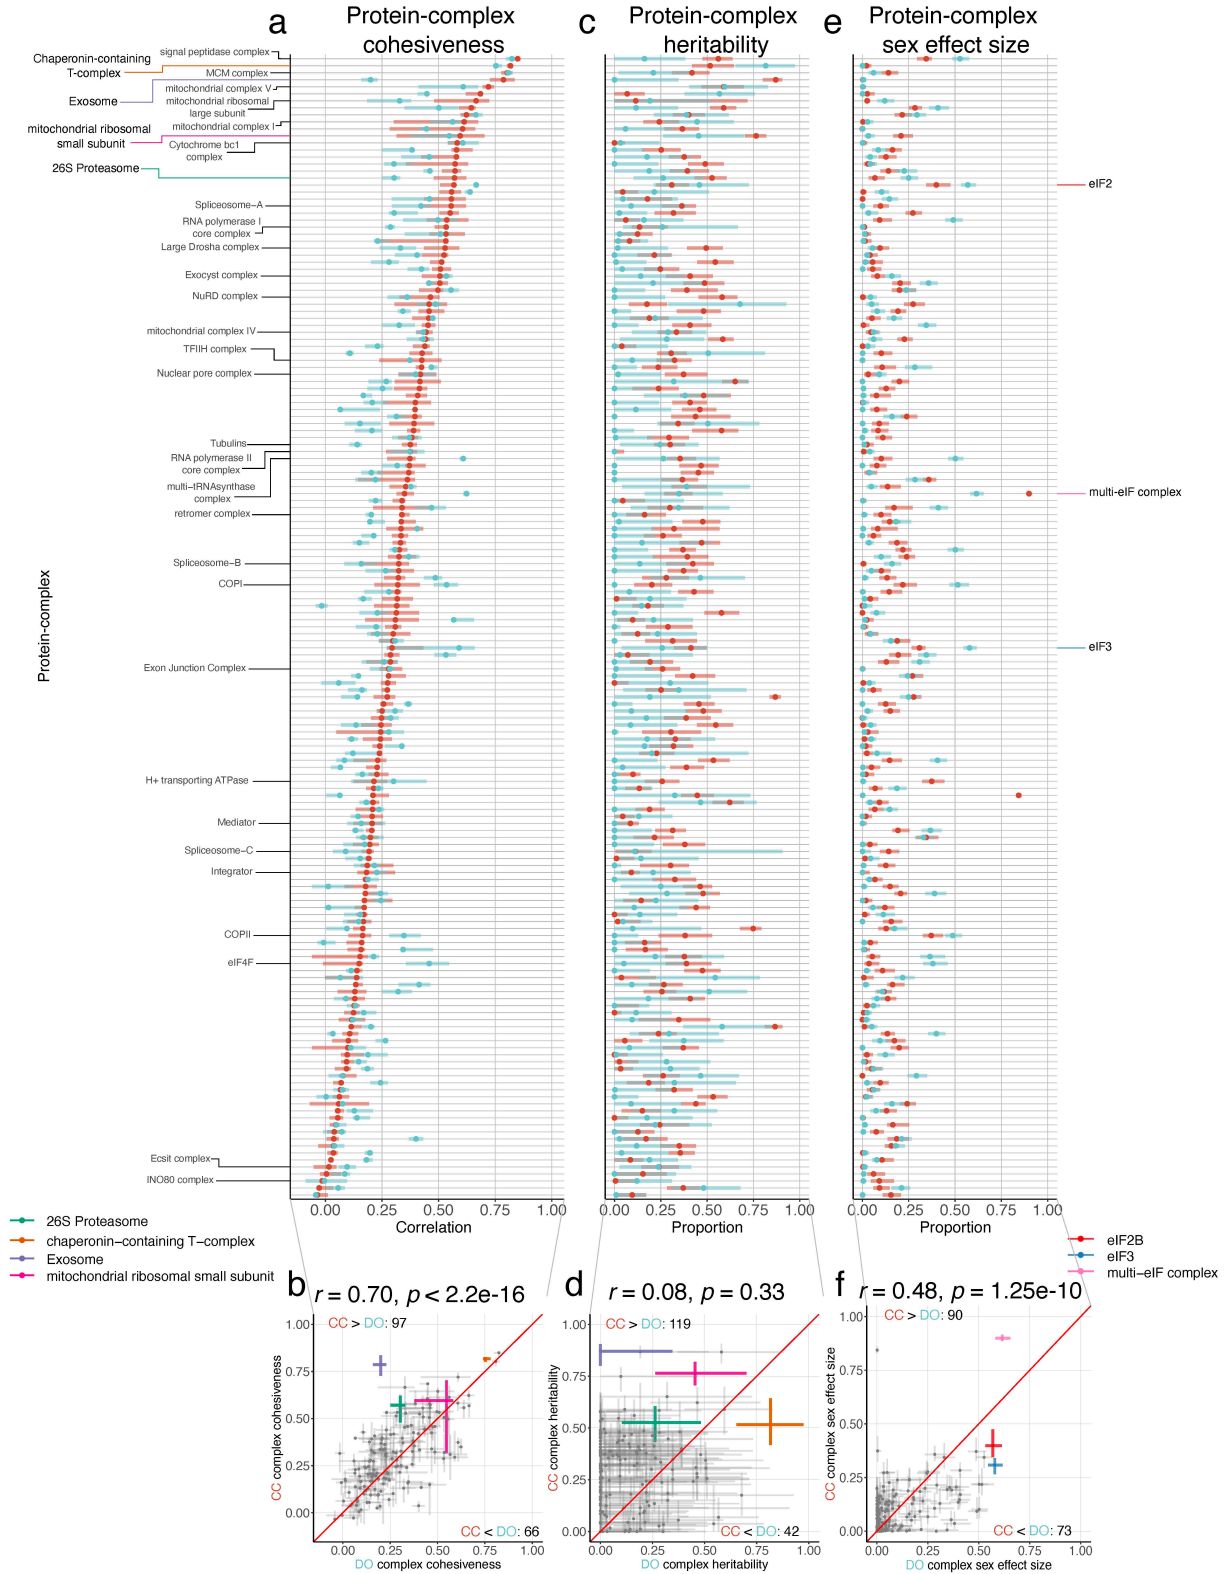

253  
 254  
 255  
 256

**Figure 3. Genetic and sex effects on protein-complexes.** (a-b) The co-abundance of complex members, *i.e.*, complex-cohesiveness, is consistent between the CC (red) and DO (blue) ( $r = 0.70, p < 2.2e-16$ ). Cohesiveness is summarized (Methods) for each of 163 annotated protein complexes (Ori et al., 2016). (c-d) Complex-heritability, based on the first principal

257 component (PC1) from each complex (**Methods**), were inconsistent between the CC and DO ( $r = 0.08, p = 0.33$ ), with heritability  
258 notably higher more often in the CC. (e-f) Complex-sex effect size, representing the proportion of variability in the complex PC1  
259 explained by sex, was consistent between the CC and DO ( $r = 0.48, p = 1.25e-10$ ). For complex-cohesiveness, the intervals  
260 represent the interquartile range, and points represent the median. For complex-heritability and complex-sex effect size,  
261 intervals represent 95% subsample intervals. Exosome, chaperonin-containing T-complex, 26S Proteasome, and the  
262 mitochondrial ribosomal small subunit are highlighted as examples of highly heritable protein-complexes that are examined in  
263 detail (**Figures 4, 5, 6, S5, & S6**). Multi-eIF complex, eIF2B, and eIF3 are highlighted as complexes with large sex effect sizes in  
264 both the CC and DO, consistent with a previous study (Romanov et al., 2019). Red diagonal line included for reference.

265 proteins that are not members of complexes (**Figure S4a-d; Table S6**). However, protein-  
266 complexes can be influenced by genetic variation, as we previously reported for the Chaperonin  
267 containing T (CCT)-complex that is stoichiometrically regulated in response to the low  
268 abundance of a member protein, CCT6A (Chick et al., 2016). We evaluated the extent to which  
269 members of annotated protein-complexes were internally correlated, as well as how genetic  
270 factors and sex contribute to variation in their joint abundance. We summarized co-abundance,  
271 which we refer to as complex cohesiveness, as the median pairwise correlation between  
272 complex members (Romanov et al., 2019). To assess the contributions from genetic factors and  
273 sex, we summarized each protein-complex using the PC1 from member proteins. We first  
274 filtered proteins with local pQTL (FDR < 0.5) or strong distal pQTL (FDR < 0.1) to minimize the  
275 influence of individual proteins with independent genetic effects in order to focus on the  
276 shared genetic effects on a protein-complex. We estimated heritability and the proportion of  
277 variation explained by sex for each complex-specific PC1 (**Table S7**).

278 Complex-cohesiveness was correlated between the CC and DO ( $r = 0.70, p < 2.2e-16$ ) (**Figure 3a**  
279 **& b**), and within each population, correlated with complex-heritability:  $r = 0.33, p = 4.37e-5$  in  
280 the CC and  $r = 0.17, p = 0.03$  in the DO (**Figure S4e**), suggesting that cohesiveness does reflect  
281 genetic factors that control protein abundance at some level. Notably, complex-heritability is  
282 consistently higher in the CC than DO (119 out of 163 complexes; 73.0%) and uncorrelated with  
283 complex-heritability in the DO ( $r = 0.08, p = 0.33$ ), in contrast to the heritability of individual  
284 proteins ( $r = 0.43, p < 2.2e-16$ ) (**Figure 3c & d**). The greater consistency between cohesiveness  
285 and heritability of protein-complexes in the CC is consistent with variation in overall protein-  
286 complex levels being influenced by non-additive genetic effects. The complex-heritability in CC  
287 captures the greater similarity of strain replicates with each other compared to other CC  
288 strains. The proportion of variation explained by sex for protein-complex abundance was  
289 correlated between the CC and DO ( $r = 0.48, p < 1.25e-10$ ; **Figure 3e-f**). Protein-complexes  
290 previously shown to be driven by sex, such as eIF2B (Romanov et al., 2019), were confirmed in  
291 both the CC and DO.

## 292 293 **Genetic and stoichiometric regulation of the exosome**

294 We identified the exosome complex as a novel and striking example of a protein-complex with  
295 stoichiometric genetic regulation in the CC (**Figure 4**). The exosome complex had the highest  
296

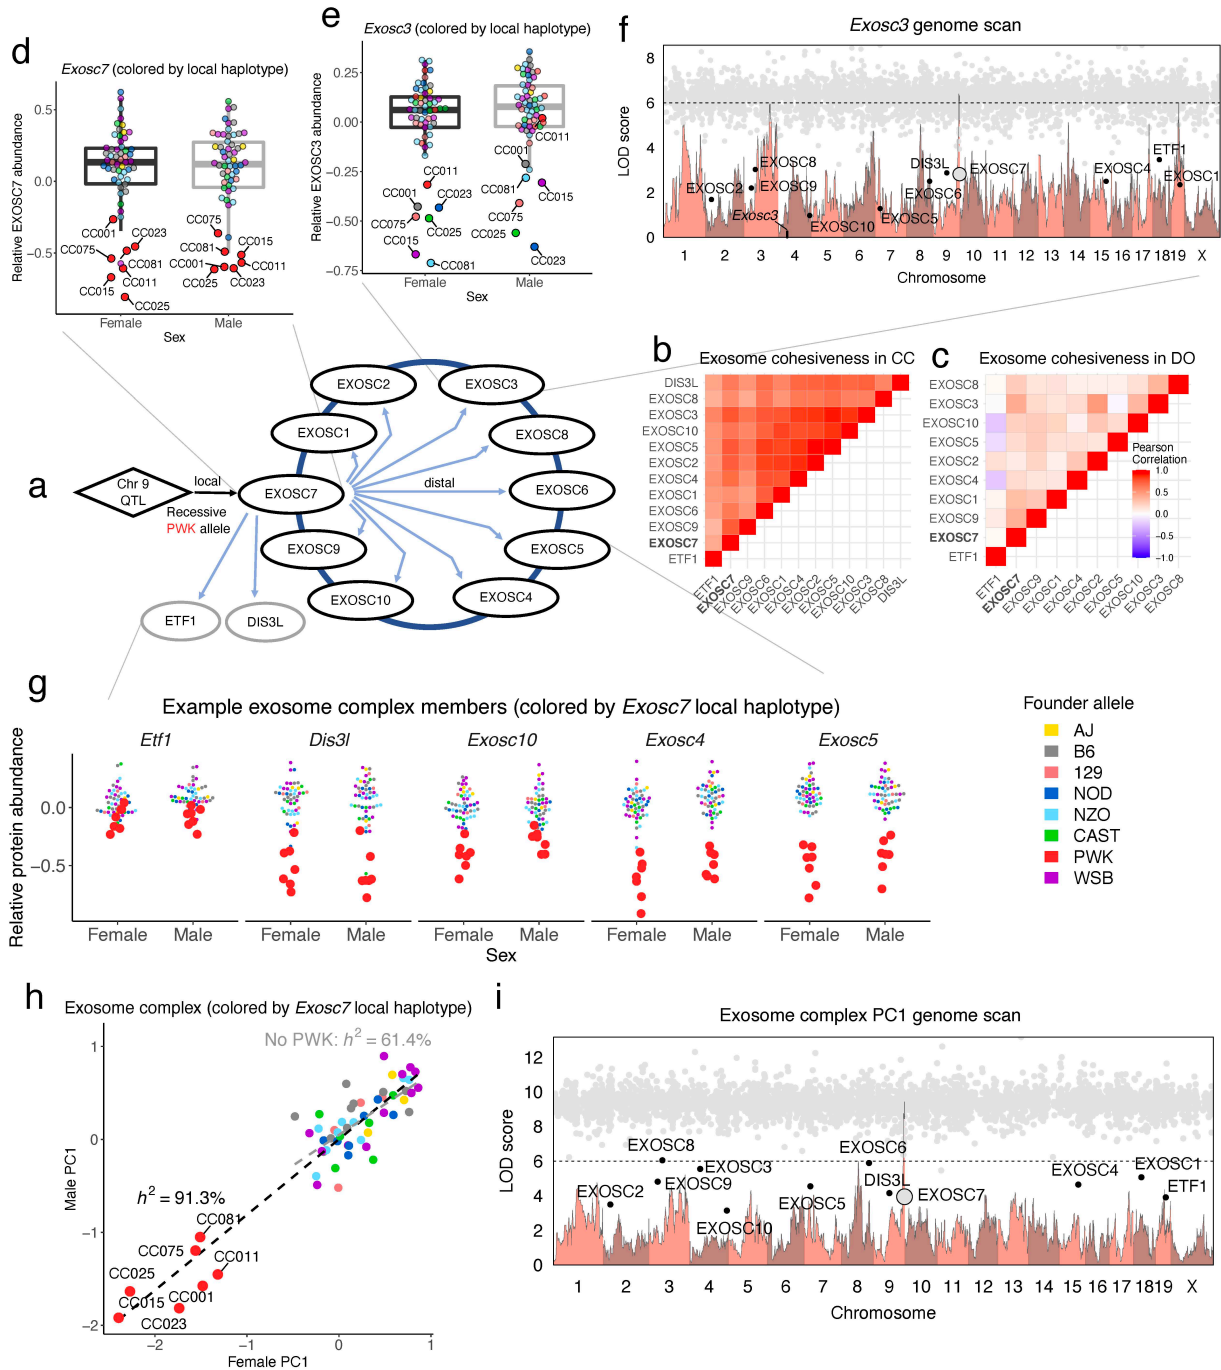

297  
 298  
 299 **Figure 4. PWK allele at *Exosc7* drives low abundance of the exosome complex and related proteins.** (a) Genetic variation at  
 300 *Exosc7* has strong effects on the other members of the exosome complex and *Dis3l* and *Etf1*, which were not annotated  
 301 members (Ori et al. 2016) though functionally related. The complex proteins were more tightly correlated in the (b) CC than the  
 302 (c) DO, potentially due to the observance of the homozygous PWK genotype and strain replicates in the CC (**Figure S5**). (d) A  
 303 local PWK allele resulted in lower EXOSC7 abundance, as observed in seven CC strains (CC001, CC011, CC015, CC023, CC25,  
 304 CC075, and CC081). Points are colored by the haplotype allele at *Exosc7*. (e) Local genetic variation at *Exosc3* does not explain  
 305 protein abundance patterns, which instead match the genetic variation at *Exosc7*, representing a distal pQTL. (f) The genome  
 306 scan for *Exosc3* reveals the distal pQTL near *Exosc7*, and mediation analysis identifies EXOSC7 as a strong mediator of the distal  
 307 pQTL (large gray dot) as well as the other exosome-related proteins as mediators (black dots), reflecting shared genetic  
 308 regulation. The remaining smaller gray dots represent mediation scores for all other quantified proteins. Horizontal dashed line  
 309 at LOD of 6 included for reference. (g) The PWK allele at *Exosc7* distally control other members of the exosome complex, with  
*Etf1*, *Dis3l*, *Exosc10*, *Exosc4*, and *Exosc5* shown here. Points are colored by the founder haplotype at *Exosc7*. (h) The first

310 principal component (PC1) from the exosome complex, plotted males against females for the CC strains. Points are colored by  
311 the founder haplotype at *Exosc7*. CC strains separate based on whether they possess the PWK allele of *Exosc7*, reflected in a  
312 complex-heritability of 91.3%. After removal of the seven strains that possess the PWK allele, the complex-heritability is 61.4%,  
313 which suggest there are remaining loci that affect the abundance of the exosome. The black dashed line is the best fit line  
314 between males and females for the complex PC1, based on all 58 CC strains. The gray dashed line excludes the seven CC strains  
315 with the PWK allele at *Exosc7*. (i) The genome scan of the complex PC1 reveals a similar scan to *Exosc3*, though the pQTL near  
316 *Exosc7* and its mediation are stronger, due to the consistent effects across complex members.

317 complex-heritability in the CC (87.0%, [80.0-90.5%]) while being essentially non-heritable in the  
318 DO (0.0%, [0.0-34.6%]). Low EXOSC7 abundance is driven by a local PWK allele in the CC, which  
319 is homozygous in seven CC strains, whereas in our DO cohort, there were no mice homozygous  
320 for the PWK allele (**Figure S5b**). Heterozygous carriers of the PWK allele in the DO mice  
321 exhibited no discernable effect, suggesting that the exosome complex is regulated by a  
322 recessive PWK allele at *Exosc7* (**Figure S5c**), which is consistent with founder PWK mice having  
323 low EXOSC7 abundance (**Figure S5d**). Mediation analysis indicates that genetic variation at the  
324 *Exosc7* locus distally regulates the complex as well as the functionally related genes, *Dis3L* and  
325 *Etf1*. These two genes were not included in the original complex annotations, and their co-  
326 regulation suggests new biological interactions discovered via our approach. The complex-  
327 heritability (with *Dis3L* and *Etf1* included as well as complex members previously filtered out  
328 due to possessing pQTL) was 91.3%, and after removing the seven strains with the PWK allele at  
329 *Exosc7*, was reduced but still high at 61.4%, indicating the presence of additional genetic factors  
330 that affect the abundance of the exosome.

331

### 332 **Secondary genetic effect on the chaperonin complex**

333 Previously we found that the CCT complex was stoichiometrically regulated and driven by low  
334 abundance of CCT6A when the NOD haplotype is present (Chick et al., 2016). The CCT complex  
335 (**Figure 5**) has higher heritability in the DO (81.6%, [65.3-97.5%]) than in the CC (51.6%, [41.8-  
336 64.4%]) (**Figure 3c & d**). The DO sample is well-powered to detect the low NOD allele that drives  
337 the complex-wide regulation, due to 19 (9.9%) of the mice being homozygous NOD. The CC  
338 strains replicate the distal pQTL at the locus of *Cct6a* through a low NOD effect for complex  
339 members (*Cct4*, *Cct5*, *Cct8*, and *Tcp1*) – but CCT6a itself was not quantified in the CC samples.  
340 The effect of the pQTL at *Cct6a* drives less of the overall variation in the CC sample due to fewer  
341 occurrences of NOD homozygotes (12 CC mice in comparison to 19 DO mice). The CC reveals a  
342 secondary genetic effect mediated through CCT4, with high NZO and PWK alleles. After  
343 including complex members that were previously filtered out for possessing pQTL, the complex-  
344 heritability was 56.3%, which, after excluding CC strains that are NOD at *Cct6a* and NZO or PWK  
345 at *Cct4*, was still significant at 46.6% (**Figure 5h**), indicating that, as with the exosome complex,  
346 additional genetic effects contribute to CCT complex abundance.

347

### 348 **Independent genetic effects on the components and subcomplexes of the 26S proteasome**

349 The 26S proteasome is composed of a 20S proteasome catalytic core (PSMA and PSMB  
350 proteins), which in the constitutive form has the constitutive subunits, PSMB5, PSMB6, and

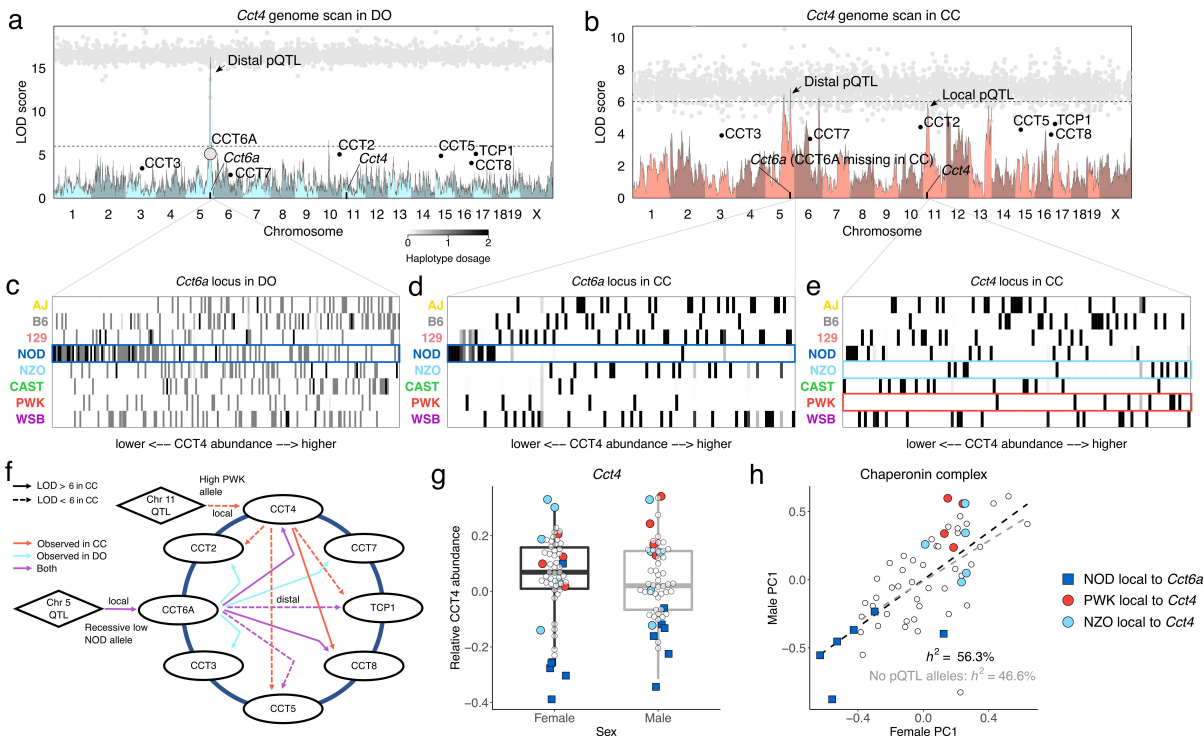

351  
 352  
 353 **Figure 5. Genetic effects on the chaperonin-containing T-complex.** Genome scans overlaid with mediation analysis for *Cct4*, a  
 354 member of chaperonin-containing T (CCT)-complex, in the (a) DO and (b) CC, reveal a shared distal pQTL on chromosome 5. The  
 355 CC also have a suggestive local pQTL for *Cct4* on chromosome 11. CCT4 was previously revealed through mediation analysis to  
 356 be distally controlled through genetic variation at *Cct6a* (large gray dot) in the DO (Chick et al., 2016). The other CCT member  
 357 proteins were detected as mediators (black dots) as well, stemming from shared genetic effects. The remaining smaller gray  
 358 dots represent mediation scores of all other quantified proteins. The mediation scan of the distal pQTL on chromosome 5 in the  
 359 CC similarly detects the other members of the CCT complex, though the likely causal intermediate CCT6A was not quantified in  
 360 the CC. Horizontal dashed line at LOD of 6 included for reference. The founder haplotype inheritance, represented as heatmaps  
 361 with founder allele dosage (expected allele counts) as rows and individual mice as columns, ordered by CCT4 abundance, at the  
 362 chromosome 5 locus near *Cct6a* in the (c) DO and (d) CC and the (e) chromosome 11 locus near *Cct4* in the CC. A low NOD  
 363 effect, potentially recessive and highlighted with dark blue boxes, drives the distal pQTL (likely through CCT6A) on CCT4 in both  
 364 the DO and CC. The local effects on *Cct4* were not as strong, though NZO and PWK had subtle high effects, highlighted as light  
 365 blue and red boxes. (f) A diagram of the population-specific and shared effects observed through pQTL and mediation analyses  
 366 in the DO and CC. Many of the pQTL in the CC are weak, with all falling below the FDR < 0.1 threshold, and some with LOD < 6  
 367 (FDR > 0.5), but they are supported by overlap with the DO (chromosome 5) or being local to a complex member (chromosome  
 368 11). (g) In the CC, CCT4 abundance is affected by genetic variation at *Cct6a* as well as its local haplotype. The dark blue squares  
 369 represent the six strains that possess the NOD allele at *Cct6a*, which had low CCT4. The light blue and red circles are the strains  
 370 with high CCT4 that possess NZO and PWK alleles at *Cct4*. (e) The first principal component (PC1) for the complex, plotted males  
 371 against females, reveals the same pattern of low strains (NOD allele of *Cct6a*; dark blue squares) and the high strains (NZO and  
 372 PWK alleles of *Cct4*; light blue and red circles, respectively). The complex-heritability was high at 56.3% and after removal of the  
 373 strains possessing notable alleles from pQTL at *Cct6a* and *Cct4*, dropped to 46.6%. The black dashed line represents the best fit  
 374 line between males and females for complex PC1 based on all strains, and the gray dashed line is the best fit line with strains

375 PSMB7, and is capped by two 19S regulators (composed of the PSMC and PSMD proteins). The  
 376 constitutive form can be modified into the immunoproteasome by replacing the respective  
 377 constitutive subunits with the three immunoproteasome inducible subunits, PSMB8, PSMB9,  
 378 and PSMB10, and the 19S regulators with the 11S regulators (made up of PSME proteins)  
 379 (Marshall and Vierstra, 2019; **Figure 6a**). The immunoproteasome is a highly efficient form of  
 380 the proteasome that is predominantly expressed in immune cells (Kimura et al., 2015).

381 This alternation between two different forms of the proteasome is apparent in the anti-  
382 correlation between the inducible and immune components in both the CC and DO (**Figure 6b**  
383 **& c**) and founder strains (**Figure S6a**). The inverse relationship between the constitutive and  
384 inducible forms suggests that although individual samples vary in the relative abundance of the  
385 constitutive proteasome and immunoproteasome, they predominantly express one of the  
386 forms. Across the founder strains, this relationship appears to be genetically regulated, with the  
387 WSB, AJ, and NZO strains expressing more immunoproteasome, and the others expressing  
388 more of the constitutive form (**Figure S6b-g**). In the recombinant CC and DO, we identified a  
389 genetic variant that controls the balance between PSMB6 (constitutive) and PSMB9  
390 (immunoproteasome). In both the CC and DO, genetic variation near *Psmb9* affected PSMB9  
391 abundance, as well as PSMB6 abundance, confirmed through mediation analysis (**Figure 6i & j**).  
392 Consistent with the anti-correlation between inducible and constitutive subunits as well as the  
393 balance in the founder strains, the relationship between PSMB9 and PSMB6 is negative, *e.g.*,  
394 mice that inherited the WSB haplotype at the *Psmb9* locus have high PSMB9 abundance and  
395 low PSMB6 abundance (**Figure 6k & l**). The pQTL only explains the balance of PSMB6/PSMB9,  
396 and while consistent with the overall balance of the constitutive and inducible forms of the  
397 proteasome observed in the founder strains, it does not directly affect the other  
398 interchangeable members of the proteasome, which do not possess their own strong pQTL. The  
399 loss in the CC and DO of the co-regulation of all constitutive and inducible members suggests  
400 epistatic factors may interact with pQTL at *Psmb9* and those relationships are broken apart  
401 in the recombinant populations, thus decoupling PSMB9 from the other immunoproteasome  
402 subunits.

403 Genetic factors also influence other components of the 26S proteasome. We identified a strong  
404 local pQTL that is consistent in both the CC and DO for *Psmid9* that does not affect other  
405 members of 19S regulator (**Figure 6g & h**), thus explaining the lack of cohesiveness of PSMD9  
406 within the proteasome, which was previously observed in the DO (Romanov et al., 2019). A  
407 distal pQTL hotspot comprising members of the 20S catalytic core and 19S regulator mapped to  
408 a short interval on chromosome 1 in the CC, most strongly observed in *Psma1* (**Figure 6m**). No  
409 single, strong mediator was detected for the hotspot, though PEX19 was the best candidate for  
410 a number of the proteins, suggesting there may be multiple drivers of the hotspot or that the  
411 true driver was not observed at the protein-level.

412

### 413 **Polygenic regulation of the mitochondrial ribosomal small subunit**

414 The mitochondrial ribosomal small subunit was highly cohesive in both populations (**Figures 3a,**  
415 **b, 6n, & o**). The complex-heritability is also high, and after including all annotated members,  
416 was 74.0% in the CC and 51.9% in the DO. Despite high complex-heritability, we detected few  
417 pQTL for individual members of the complex. The one notable exception is *Auh*, for which we  
418 detected a strong local pQTL in the CC and DO (**Figure 6r & s**).

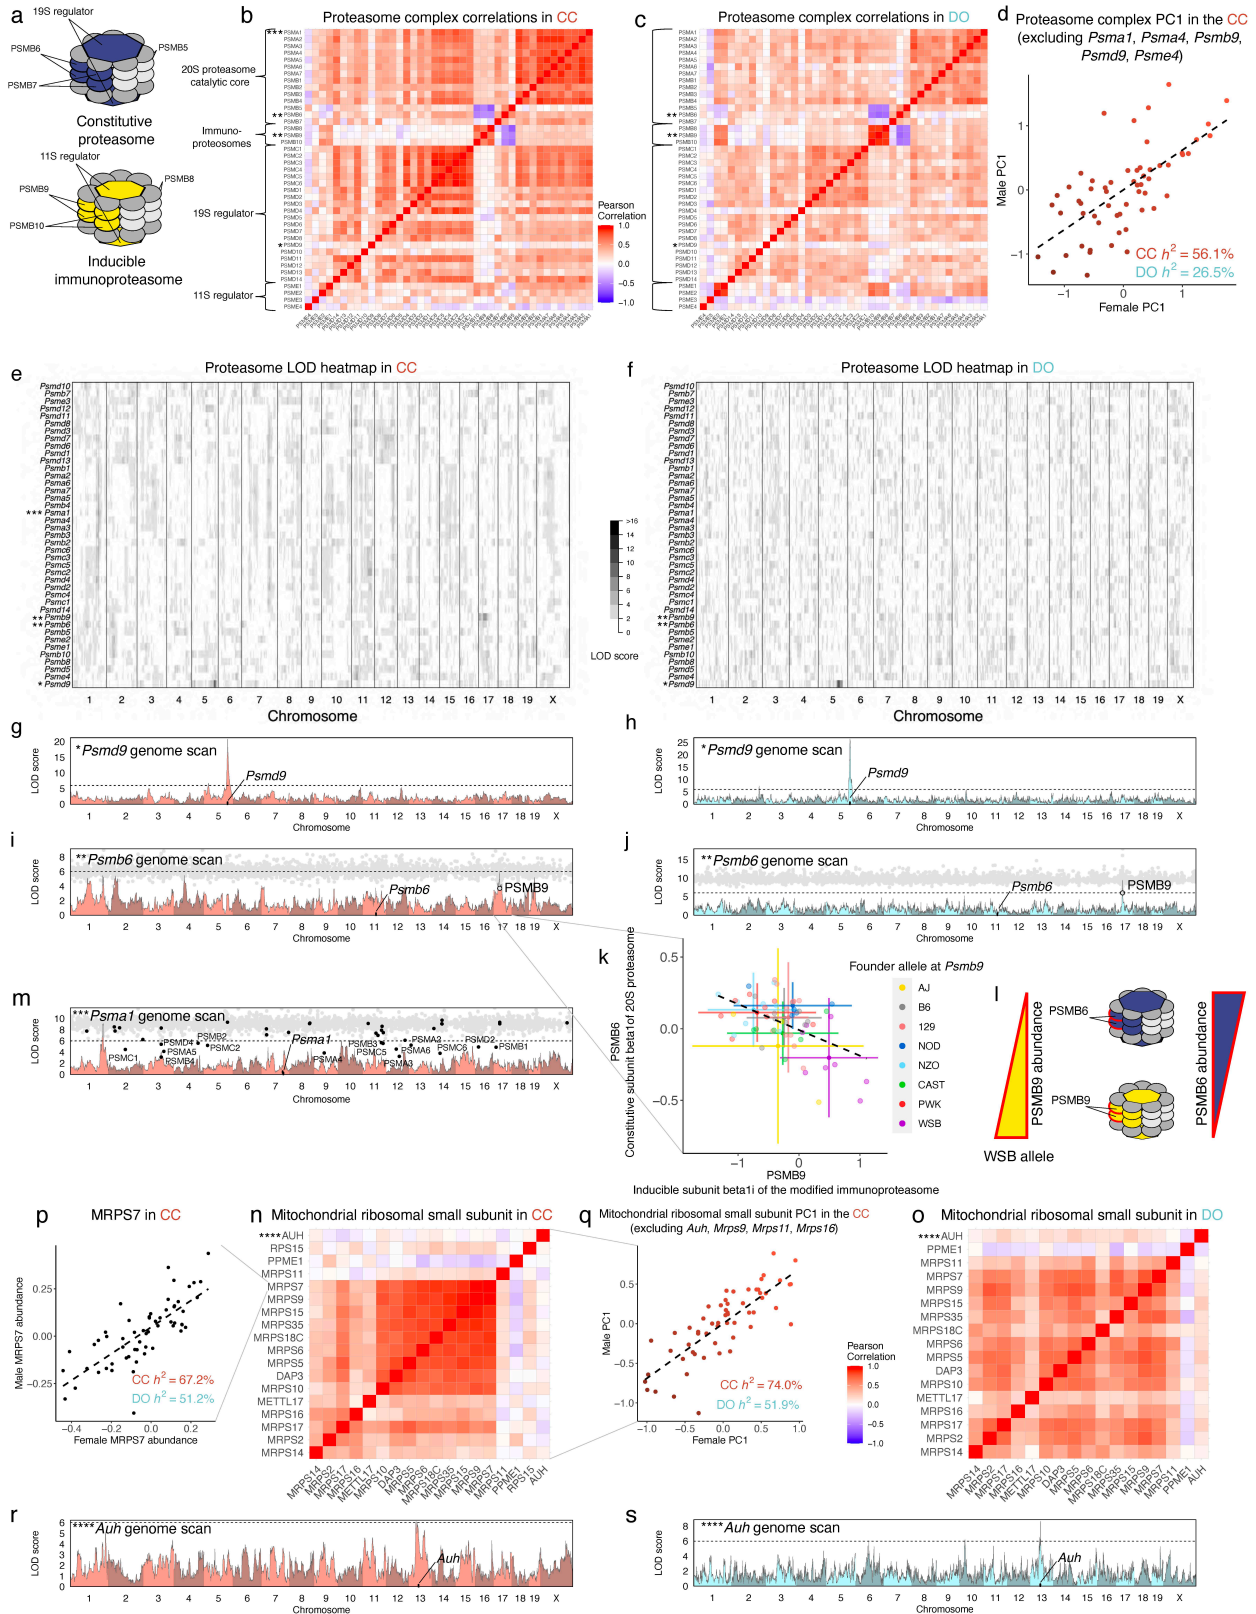

419  
420  
421  
422

**Figure 6. Polygenic regulation of the 26S proteasome and the mitochondrial ribosomal small subunit.** (a) The 26S proteasome is composed of multiple subcomplexes: the 20S proteasome catalytic core (*PsmA* and *PsmB* genes) and 19S regulator (*PsmC* and *PsmD* genes) for the constitutive form, and the inducible immunoproteasomes (*PsmB8*, *PsmB9*, and *PsmB10*) with their 11S

423 regulator (*Psme* genes). The correlation patterns between member proteins reflect these subcomplexes, which are highly  
424 consistent between the (b) CC and (c) DO (and founder strains; **Figure S6a**). The overall correlation pattern reflects an inverse  
425 relationship between the constitutive proteasome and the inducible immunoproteasome. (d) CC strain identity explains a large  
426 portion of the variability in the first principal component (PC1) of the proteasome (after excluding genes with strong pQTL) and  
427 the complex-heritability is notably higher in the CC (56.1%) than DO (26.5%). The dashed line represents the best fit line  
428 between males and females in the complex PC1. A portion of the complex correlation structure can be explained by pQTL,  
429 shown here as a heatmap of genome scans (proteins as rows and genomic coordinate as columns), for the (e) CC and (f) DO.  
430 *Psm9* (\*) has a strong local pQTL in both the (g) CC and (h) DO, which is not shared with other proteasome proteins, explaining  
431 why *Psm9* is poorly correlated with other members of the 19S proteasome. Horizontal dashed line at LOD of 6 included for  
432 reference. *Psm6* (\*\*) has a distal pQTL in both the (i) CC and (j) DO, which is mediated by PSMB9. Gray dots represent  
433 mediation scores for all quantified proteins, with PSMB9 highlighted as a large gray dot. (k) The relationship is negative –  
434 individuals with low abundance of PSMB9 (most notably CC strains with the WSB allele at *Psm9*) have high abundance of  
435 PSMB6. Intervals represent mean  $\pm$  2 standard deviation bars. The dashed line represents the best fit line between PSMB6 and  
436 PSMB9 for the CC mice. (l) PSMB6 is a constitutive subunit of the 20S proteasome and PSMB9 is the corresponding inducible  
437 subunit in the modified immunoproteasome, suggesting that the inverse relationship between constitutive proteasome and  
438 immunoproteasome is genetically controlled for at least PSMB6 and PSMB9 in the CC and DO (though more broadly controlled  
439 in the founder strains; **Figure S6b-g**). A distal pQTL hotspot was observed in the CC on chromosome 1 (~170 Mbp) which was  
440 not present in the DO, for which (m) *Psm1* (\*\*\*) has the strongest signal. Though a strong mediator was not detected from the  
441 proteins near the pQTL, many members of the 20S and 19S proteasomes present as strong mediators (black dots) due to the  
442 strong correlation among the proteins that map to the hotspot. The mitochondrial ribosomal small subunit was more heritable  
443 and cohesive than the 26S proteasome (**Figure 3**), which is evident in the correlation patterns for both the (n) CC and (o) DO.  
444 The individual proteins, such as (p) MRPS7, and the (q) complex PC1 (after excluding genes with strong pQTL) are highly  
445 consistent within CC strains despite few strong pQTL related to the complex. The dashed line represents the best fit line  
446 between males and females in MRPS7 and complex PC1. Similar to *Psm9* within the 26S proteasome, a less cohesive member  
447 of the complex, *Auh* (\*\*\*\*), can be explained by a unique local pQTL detected in both the (r) CC and (s) DO.

448 AUH was incohesive with the core of the complex, composed of mostly MRPS proteins. The  
449 complex PC1 and individual proteins are highly consistent within CC strain ( $r = 0.81$  for the  
450 complex PC1;  $r = 0.76$  for MRPS7) while displaying continuous variation across the CC  
451 population (**Figures 6p & q**). This distribution contrasts with the bimodal pattern of abundance  
452 for the exosome complex, which is driven by a single strong pQTL (**Figure 4h**) and suggests that  
453 many loci with small effects influence the overall abundance of the mitochondrial ribosomal  
454 small subunit.

#### 455 456 **Strain-private variants affect protein abundance**

457 Inbred mouse strains can accumulate mutations, and these variants can lead to phenotypic  
458 abnormalities across classical inbred strains, *e.g.*, new mutations that become fixed in sub-  
459 strains of B6 (Kumar et al., 2013) and in the parental B6 and DBA stocks (Anderson et al., 2002)  
460 used across different epochs of the BxD panel (Ashbrook et al., 2019; Mulligan et al., 2012).  
461 New mutations originate and became fixed in the CC strains (Shorter et al., 2019; Srivastava et  
462 al., 2017) (**Figure 1a**). As a proof of concept, we first confirmed the loss of expression of  
463 proteins with known deletions, such as the 80 kbp deletion in CC026 that includes *C3* and a 15  
464 bp deletion for CC042 in *Itgal* (**Figure 7a-b**) that increases susceptibility to tuberculosis (Smith  
465 et al., 2019) and salmonella (Zhang et al., 2019). Next, we estimated CC strain-specific effects  
466 for each protein in the CC and identified CC strains with extreme abundance of a given protein,  
467 referred to as strain-protein outliers (**Methods**). In total, we identified 6,046 strain-protein



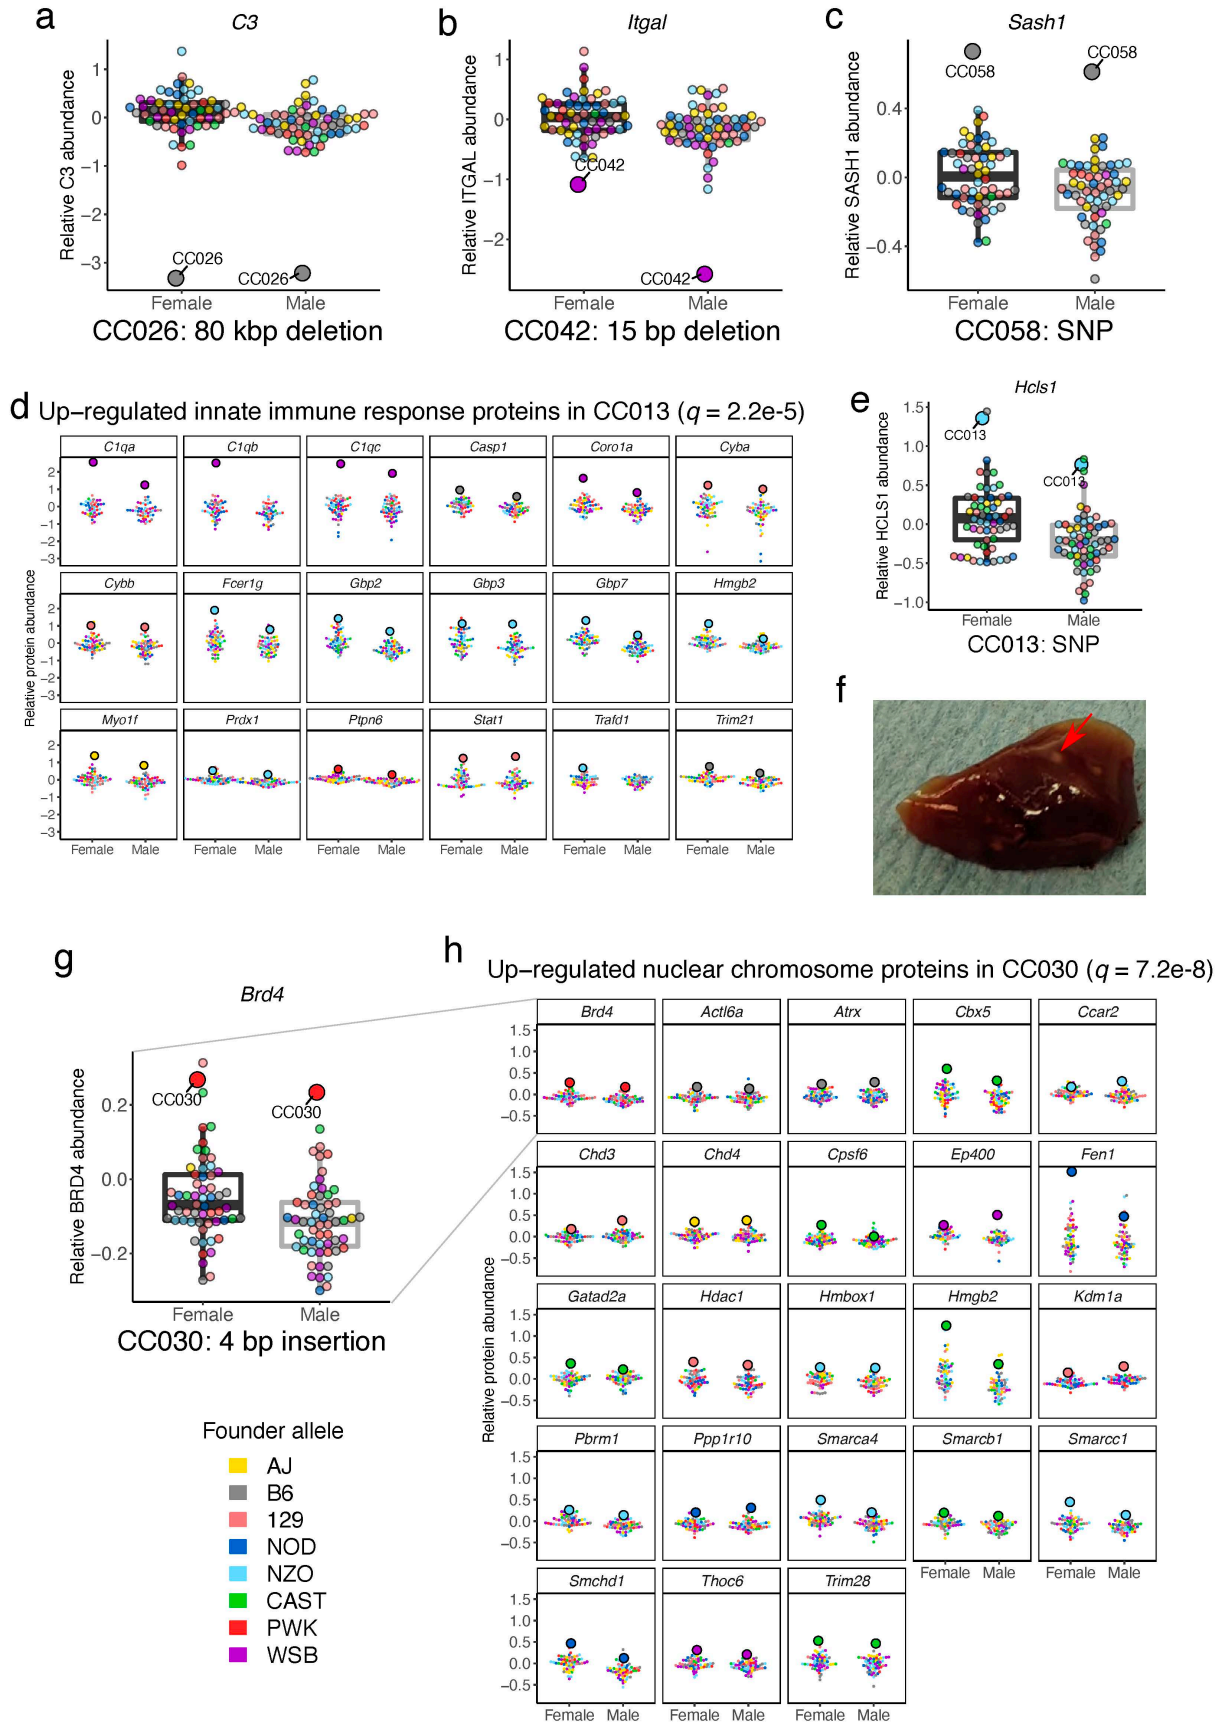

469 **Figure 7. Strain-private genetic variants affect protein abundance and potentially influence larger protein networks.** The  
470 effects of known strain-private deletions on protein abundance were confirmed for (a) *C3* in CC026 and (b) *Itgal* in CC042. The  
471 color or the dots indicates the founder allele at the gene. (c) A novel SNP allele in *Sash1* specific to CC058 is associated with an  
472 increase in SASH1 abundance. (d) Proteins related to innate immune response and other related pathways were high abundant  
473 in CC013. Large dots represent the specified CC strain with extreme protein abundance. (e) CC013 also possesses a strain-  
474 specific SNP allele in *Hcls1*, a gene involved in leukocyte differentiation, which may contribute to its unique protein abundance  
475 patterns in immune pathways. (f) CC013 has a unique liver phenotype, characterized by white granules, highlighted with red  
476 arrow, which may be related to the increased abundance of immune proteins. CC030 possesses a (g) private insertion in *Brd4*,  
477 which may contribute to (h) increased abundance in genes related to nuclear chromosome. Additional functionally related  
478 strain-specific protein dynamics are shown in **Figure S7**.

479 outliers, representing 4,323 proteins across all 58 CC strains. The strain-protein outliers  
480 coincided with 69 known strain-private genetic variants (Srivastava et al., 2017), meaning the  
481 strain-protein outlier could represent a local effect of the private variant associated with the  
482 protein's coding gene, and this level of enrichment was significant per permutation ( $p = 3.7e-4$ ).  
483 Interestingly, not all of the observed outliers associated with genetic variants were low  
484 extremes, as would be expected with a mutation that results in loss of the protein; we also  
485 observed increases in protein abundance in strains with private variants, such as *Sash1*, which  
486 harbors a novel SNP allele in CC058 (**Figure 7c**). CC004 has a unique SNP allele associated with  
487 low abundance of *Plek*, a gene which also has a weak local pQTL based on genetic variation  
488 from the founder strains (**Figure S7e & f**).

489 The presence of biologically related proteins with extreme abundances specific to CC strains  
490 further supports the impact of strain-specific genetic variants and regulatory patterns. We  
491 identified strain-specific dynamics by testing the set of outlying proteins specific to each CC  
492 strain for enrichment in GO and KEGG pathway terms (**Tables S8 and S9**). In CC013, we  
493 observed increased abundance in proteins with GO annotations for the innate immune system  
494 (**Figure 7d**), leukocytes, and other immune system-related GO terms. CC013 possesses a unique  
495 SNP allele in *Hcls1* that was associated with increased HCLS1 abundance (**Figure 7e**), a gene  
496 involved in myeloid leukocyte differentiation that may contribute to the high abundance of  
497 immune-related proteins in CC013. CC013 also expressed a unique liver phenotype,  
498 characterized by white granules across the tissue (**Figure 7f**), which may relate to the excess of  
499 immune-related proteins. CC030 has a 4 bp insertion in *Brd4* that was associated with high  
500 BRD4 abundance and may contribute to increased abundance in proteins related to nuclear  
501 chromosome and chromatin (**Figure 7g-h**). The strain-specific protein outlier sets were enriched  
502 in a wide range of GO biological functions (**Figure S7g-j**), including low and high abundance of  
503 proteins from the mitochondrial respiratory complex I in CC007 and high abundance of  
504 cytosolic ribosome proteins in CC009.

505

## 506 **DISCUSSION**

507 Multiparent populations are key resources for understanding genetic architecture; developing  
508 new phenotypic models of disease; and producing robust results that translate from model

509 organisms to genetically diverse outbred populations such as humans. Here we show that the  
510 CC, DO, and their founder strains broadly share protein heritability, pQTL, their mediators, and  
511 sex effects on proteins. In comparison to individual proteins, protein-complexes were less  
512 consistent across these populations, highlighting the role of non-additive genetic effects in  
513 controlling protein-complex interactions. We observed a wide range of genetic effects on  
514 protein complexes, ranging from stoichiometric regulation in response to a large-effect locus  
515 (exosome and CCT complexes) to multi-locus and highly polygenic regulation (*e.g.*, the 26S  
516 proteasome and mitochondrial ribosomal small subunit, respectively). Within the CC, we  
517 observed strong effects on protein abundance from new mutations in specific CC strains. Lastly,  
518 we highlight individual CC strains with both aberrant protein regulation based on strain-specific  
519 mutations that broadly disrupt protein regulatory networks.

520

### 521 **Conservation of pQTL between CC and DO**

522 Consistent with expectations, the effects of local genetic variation are highly conserved  
523 between the CC and DO (and often with the founder strains). In cases where discordance  
524 occurred between populations, we can often explain based on differing founder allele  
525 frequencies between the populations, such as for the local pQTL of *Ercc2* that is not detected in  
526 the DO because only one NOD homozygote was observed in the DO sample. Differences  
527 between populations stemming from different allele frequencies has been observed in human  
528 populations (Mogil et al., 2018). These discordant cases highlight how dominance and large-  
529 scale homozygosity contribute to the genetic effects on proteins, exposed by comparing the CC  
530 and DO. Distal (*i.e.*, *trans*) pQTL are often harder to detect due to weaker effects and are thus  
531 more likely to be discordant based on differences in allele frequencies and the presence of non-  
532 additive effects. Here we showed that the 19 distal pQTL that were detected in both  
533 populations at FDR < 0.1 are highly consistent, both in terms of haplotype effects and their  
534 mediation candidates. Discordance in effects between the CC and DO was much greater for  
535 distal pQTL detected in a single population, which is in striking contrast to the strong  
536 concordance of local genetic effects detected in only one population. The extent of discordance  
537 in distal pQTL effects compared to local effects suggests that additional factors are contributing  
538 beyond differing allele frequencies and may represent distal genetic effects that are not  
539 conserved across population.

540 Mediation analysis results mirror the concordance of distal pQTL effects, with largely the same  
541 mediators detected for distal pQTL detected with high confidence in both populations. There  
542 are some key caveats with mediation analysis, such as its accuracy being dependent on the true  
543 mediator being present in the data. If a candidate mediator is correlated with the true but  
544 unobserved mediator, possibly due to LD, it will likely be identified as a false positive mediator.  
545 This issue is problematic for proteomics studies if the mediator is not captured in the protein

546 data, such as non-coding RNAs or lowly abundant proteins that go undetected in the mass-spec  
547 analysis. For example, PGD was detected as a candidate mediator of a distal pQTL of *Akr1e1* in  
548 both the CC and DO; however, previous studies identified zinc finger proteins (*Rex2* and *Zfp985*)  
549 as the most likely mediator of the pQTL (Hamilton-Williams et al., 2010; Keele et al., 2020). Zinc  
550 finger proteins are lowly expressed and not prevalent in proteomics data, and in their absence,  
551 the nearby protein PGD stands out as the best mediator in both populations. Variable  
552 measurement error across candidate mediators can also cause preference for a false mediator  
553 due to noise reducing the correlation between the distally controlled protein and its true  
554 mediator. This is likely occurring in the DO where NAXD is the stronger mediator for the *Tubg1*  
555 distal pQTL than TUBGCP3, the strong biological candidate. Furthermore, the presence of  
556 variable measurement error in proteomics is likely, stemming from the overall magnitude of  
557 each protein's expression, the size of the protein and the number of peptides used to  
558 summarize it, and how specifically those peptides map to the protein. Comparisons of  
559 mediation analysis of two independent genetic experiments can provide replication of findings,  
560 as well as assess a more complete set of candidate mediators and correct misidentifications.

561

#### 562 **Non-additive genetic effects on proteins and protein-complexes**

563 Protein-complexes can be viewed as emergent phenotypes that can be driven by independently  
564 regulated members or sub-complexes, as well as higher order dynamics like protein-protein  
565 stoichiometry that control complex assembly. We observed a spectrum of cohesiveness  
566 (Romanov et al., 2019) across the protein-complexes and our three populations. These  
567 differences reflected components and sub-complexes that are semi-independent of the greater  
568 complex, as well as the underlying genetic architectures of the populations. Because high  
569 cohesiveness does not necessarily imply that a protein-complex is genetically regulated (*e.g.*,  
570 stoichiometry could produce tight correlation among complex members due to non-genetic  
571 factors), we employed genetic analyses (*e.g.*, QTL and heritability) to characterize genetic  
572 control of the protein-complexes. We found a number of strong and distinct examples of  
573 protein-complexes that are genetically regulated. Despite the challenges imposed by separate  
574 experiments and the relative nature of mass-spec proteomics (O'Brien et al., 2018), comparing  
575 the CC to the DO reveals the impact of an inbred genetic background on a number of protein-  
576 complexes, due to recessive effects, or conversely, the lack of dominance genome-wide.  
577 Furthermore, CC strain replicates can capture multi-locus interactions, *i.e.*, epistasis, by fixing  
578 alleles at multiple loci within a strain. These results support the CC as a distinctly powerful tool  
579 for genetic analyses of emergent phenotypes like protein-complexes and as a companion  
580 resource to the DO for disentangling complicated genetic mechanisms.

581 The examples of genetically regulated protein-complexes that we identified represented a  
582 continuum of polygenicity underlying their genetic architecture. Examples ranged from the

583 exosome with a single large effect pQTL local to a single member driving most variation, to the  
584 highly polygenic mitochondrial ribosomal small subunit, reflected in its continuous distribution  
585 across the CC strains and lack of pQTL. Intermediate to these extremes are examples like the  
586 CCT complex with its combination of a large effect pQTL with subtle secondary genetic effects  
587 revealed in the CC, and the 26S proteasome with its well-defined sub-complexes representing  
588 two distinct forms for altered biological function, the balance of which is genetically controlled  
589 to various degrees in these three populations. A common feature shared by these example  
590 protein-complexes examples is some degree of polygenicity. Even the fairly monogenic  
591 exosome and CCT complexes have some residual heritability after removing the CC strains that  
592 possess the contrasting alleles of the pQTL, suggesting other loci have secondary effects. The  
593 polygenic effects that drives the residual heritability may also be non-additive. In the DO, the  
594 exosome and CCT complex – after accounting for the strong pQTL of *Cct6a* – appear non-  
595 heritable, either due to large-scale dominance or the inability to capture epistatic effects in an  
596 outbred genetic background. These examples highlight the challenge of dissecting polygenic  
597 and non-additive effects down to individual loci and their specific mechanisms, emphasizing the  
598 value of related genetic resource populations with differing genetic architecture, like the CC  
599 and DO.

600

#### 601 **New models of aberrant protein functional networks and disease**

602 The unique biology of individual mouse strains has led to a variety of discoveries of genetically  
603 based disease phenotypes. We leveraged the CC population to identify strains exhibiting  
604 aberrant protein dynamics that could not be tied to the founder strains, such as being  
605 downstream of mutations unique to specific CC strains. They may also result from unique  
606 combinations of alleles of upstream drivers of a shared functional network. Examples include  
607 increased abundance of immune-related proteins and unique liver phenotype in CC013, which  
608 we are following up, and altered mitochondrial respiratory complex I function in CC007. Due to  
609 the replicability of the CC population, these strain-specific protein networks can be followed up,  
610 confirmed, and the underlying mechanisms dissected to reveal new biology and develop new  
611 models of disease.

612

#### 613 **Integrative genetic resource populations**

614 Proteins are a more functionally relevant measure of physiology and disease than the more  
615 commonly measured gene transcripts. In our examination of protein regulation across three  
616 related populations, we found that local genetic and sex effects on protein abundance were  
617 consistent, suggesting that molecular phenotype data and their findings can largely be  
618 integrated across these populations. It is easy to conceive of investigators querying specific  
619 genes of interest to assess whether their proteins possess sex effects, pQTL and their haplotype

620 effects, or mediators of distal pQTL. To enable these queries, we provide interactive QTL  
621 analysis tools for both the CC (<https://churchilllab.jax.org/qtlviewer/CC/Ferris>) and DO  
622 (<https://churchilllab.jax.org/qtlviewer/DO/Svenson>). In contrast, higher order molecular  
623 phenotypes or characteristics, such as protein-complexes and regulatory networks, showed  
624 greater discordance across these populations. Non-additive genetic effects, either at a single  
625 locus or across loci, were apparent in the regulation of protein-complexes, driving the  
626 discordance between populations based on the genetic architecture of each. Lastly, we  
627 identified CC strain-specific aberrant protein abundances, their phenotypic or system relevance,  
628 and their putative consistency with previously described mutations present across these  
629 strains.

630 In this work, we used these diverse mouse populations to finely dissect genetic effects on  
631 protein-complexes in liver tissue, revealing the presence of non-additive effects and a polygenic  
632 spectrum of genetic regulatory patterns. In the future, we envision highly expandable joint  
633 population resources, covering a range of molecular phenotypes (*e.g.*, RNA-seq, ATAC-seq,  
634 mass-spec proteomics) and tissues relevant to human disease.

635

## 636 **METHODS**

### 637 **Founder and CC strains**

638 The CC and DO are descended from eight inbred founder strains: A/J (AJ), C57BL/6J (B6),  
639 129S1/SvImJ (129), NOD/ShiLtJ (NOD), NZO/H1LtJ (NZO), CAST/EiJ (CAST), PWK/PhJ (PWK), and  
640 WSB/EiJ (WSB). We previously collected, processed, and quantified liver proteins from two  
641 females and two males from each founder strain as well as 192 DO mice (Chick et al., 2016).

642 We received pairs of young mice from 58 CC strains from the UNC Systems Genetics Core  
643 Facility between the summer of 2018 and early 2019. Mice were singly housed upon receipt  
644 until eight weeks of age. The 58 CC strains used in this study include: CC001/Unc (CC001),  
645 CC002/Unc (CC002), CC003/Unc (CC003), CC004/TauUnc (CC004), CC005/TauUnc (CC005),  
646 CC006/TauUnc (CC006), CC007/Unc (CC007), CC008/GeniUnc (CC008), CC009/UncJ (CC009),  
647 CC010/GeniUnc (CC010), CC011/Unc (CC011), CC012/GeniUnc (CC012), CC013/GeniUnc  
648 (CC013), CC015/Unc (CC015), CC016/GeniUnc (CC016), CC017/Unc (CC017), CC019/TauUnc  
649 (CC019), CC021/Unc (CC021), CC023/GeniUnc (CC023), CC024/GeniUnc (CC024),  
650 CC025/GeniUnc (CC025), CC026/GeniUnc (CC026), CC027/GeniUnc (CC027), CC029/Unc  
651 (CC029), CC030/GeniUnc (CC030), CC031/GeniUnc (CC031), CC032/GeniUnc (CC032),  
652 CC033/GeniUnc (CC033), CC035/Unc (CC035), CC036/Unc (CC036), CC037/TauUnc (CC037),  
653 CC038/GeniUnc (CC038), CC039/Unc (CC039), CC040/TauUnc (CC040), CC041/TauUnc (CC041),  
654 CC042/GeniUnc (CC042), CC043/GeniUnc (CC043), CC044/Unc (CC044), CC045/GeniUnc  
655 (CC045), CC046/Unc (CC046), CC049/TauUnc (CC049), CC051/TauUnc (CC051), CC053/Unc  
656 (CC053), CC055/TauUnc (CC055), CC057/Unc (CC057), CC058/Unc (CC058), CC059/TauUnc  
657 (CC059), CC060/Unc (CC060), CC061/GeniUnc (CC061), CC062/Unc (CC062), CC071/TauUnc  
658 (CC071), CC072/TauUnc (CC072), CC075/UncJ (CC075), CC078/TauUnc (CC078), CC079/TauUnc

659 (CC079), CC080/TauUnc (CC080), CC081/Unc (CC081), and CC082/Unc (CC082). More  
660 information regarding the CC strains can be found at  
661 <http://csbio.unc.edu/CCstatus/index.py?run=AvailableLines.information>.

662

### 663 **Mouse genotyping, founder haplotype reconstruction, and gene annotations**

664 The 116 CC mice were genotyped on the Mini Mouse Universal Genotyping Array (MiniMUGA),  
665 which includes 11,125 markers (Sigmon et al., 2020). Founder haplotypes were reconstructed  
666 using a Hidden Markov Model (HMM), implemented in the qtl2 R package (Broman et al.,  
667 2019), using the “risib8” option for an eight founder recombinant inbred panel. Notably,  
668 heterozygous markers are omitted, and haplotype reconstructions are limited to homozygous  
669 states, smoothing over potential residual heterozygous sites that remain in the CC mice. The  
670 genotyping and haplotype reconstruction for the DO mice were previously described (Chick et  
671 al., 2016); briefly, genotyping was performed on the larger MegaMUGA (57,973 markers)  
672 (Morgan and Welsh, 2015), from which founder haplotypes were reconstructed using the  
673 DOQTL R package (Gatti et al., 2014).

674 Ensembl version 91 gene and protein annotations were used in the CC, whereas version 75 was  
675 previously used in the older DO and founder strains data. If the gene symbol or gene ID differed  
676 for a protein ID between versions 75 and 91, we updated them to version 91 in the DO and  
677 founder strains. When comparing results (*e.g.*, pQTL, heritability, sex effects) between the CC  
678 and the DO or founder strains, we merged based on protein ID. For the more complicated  
679 results from mediation analysis, we allowed matches based on mediator gene symbol if the  
680 target protein IDs matched.

681

### 682 **Sample preparation for proteomics analysis**

683 The sample preparation and mass-spec experimentation and analysis for the DO and founder  
684 strains were previously described (Chick et al., 2016). Singly housed CC mice had their food  
685 removed six hours prior to euthanasia and tissue harvest. Tissues were dissected out, weighed,  
686 and snap frozen in liquid nitrogen. Pulverized CC liver tissue were syringe-lysed in 8 M urea and  
687 200 mM EPPS pH 8.5 with protease inhibitor and phosphatase inhibitor. BCA assay was  
688 performed to determine protein concentration of each sample. Samples were reduced in 5 mM  
689 TCEP, alkylated with 10 mM iodoacetamide, and quenched with 15 mM DTT. 200 µg protein  
690 was chloroform-methanol precipitated and re-suspended in 200 µL 200 mM EPPS pH 8.5. The  
691 proteins were digested by Lys-C at a 1:100 protease-to-peptide ratio overnight at room  
692 temperature with gentle shaking. Trypsin was used for further digestion for 6 hours at 37°C at  
693 the same ratio with Lys-C. After digestion, 50 µL of each sample were combined in a separate  
694 tube and used as the 11<sup>th</sup> sample in all 12 tandem mass tag (TMT) 11plex. 100 µL of each  
695 sample were aliquoted, and 30 µL acetonitrile (ACN) was added into each sample to 30% final  
696 volume. 200 µg TMT reagent (126, 127N, 127C, 128N, 128C, 129N, 129C, 130N, 130C, 130N,  
697 and 131C) in 10 µL ACN was added to each sample. After 1 hour of labeling, 2 µL of each sample  
698 was combined, desalted, and analyzed using mass-spec. Total intensities were determined in  
699 each channel to calculate normalization factors. After quenching using 0.3% hydroxylamine, 11  
700 samples were combined in 1:1 ratio of peptides based on normalization factors. The mixture  
701 was desalted by solid-phase extraction and fractionated with basic pH reversed phase (BPRP)

702 high performance liquid chromatography (HPLC), collected onto a 96 well plate and combined  
703 for 24 fractions in total. Twelve fractions were desalted and analyzed by liquid  
704 chromatography-tandem mass spectrometry (LC-MS/MS).

705

#### 706 **Off-line basic pH reversed-phase (BPRP) fractionation**

707 We fractionated the pooled TMT-labeled peptide sample using BPRP HPLC (Wang et al., 2011).  
708 We used an Agilent 1200 pump equipped with a degasser and a photodiode array (PDA)  
709 detector. Peptides were subjected to a 50-min linear gradient from 5% to 35% acetonitrile in 10  
710 mM ammonium bicarbonate pH 8 at a flow rate of 0.6 mL/min over an Agilent 300Extend C18  
711 column (3.5  $\mu$ m particles, 4.6 mm ID, and 220 mm in length). The peptide mixture was  
712 fractionated into a total of 96 fractions, which were consolidated into 24, from which 12 non-  
713 adjacent samples were analyzed (Paulo et al., 2016a). Samples were subsequently acidified with  
714 1% formic acid and vacuum centrifuged to near dryness. Each consolidated fraction was  
715 desalted via StageTip, dried again via vacuum centrifugation, and reconstituted in 5%  
716 acetonitrile, 5% formic acid for LC-MS/MS processing.

717

#### 718 **Liquid chromatography and tandem mass spectrometry**

719 Mass spectrometric data were collected on an Orbitrap Fusion Lumos mass spectrometer  
720 coupled to a Proxeon NanoLC-1200 UHPLC. The 100  $\mu$ m capillary column was packed with 35  
721 cm of Accucore 50 resin (2.6  $\mu$ m, 150 $\text{\AA}$ ; ThermoFisher Scientific). The scan sequence began with  
722 an MS1 spectrum (Orbitrap analysis, resolution 120,000, 350–1400 Th, automatic gain control  
723 (AGC) target 5E5, maximum injection time 50 ms). SPS-MS3 analysis was used to reduce ion  
724 interference (Gygi et al., 2019; Paulo et al., 2016b). The top 10 precursors were then selected  
725 for MS2/MS3 analysis. MS2 analysis consisted of collision-induced dissociation (CID),  
726 quadrupole ion trap analysis, automatic gain control (AGC) 1E4, NCE (normalized collision  
727 energy) 35,  $q$ -value < 0.25, maximum injection time 60 ms), and isolation window at 0.5.  
728 Following acquisition of each MS2 spectrum, we collected an MS3 spectrum in which multiple  
729 MS2 fragment ions are captured in the MS3 precursor population using isolation waveforms  
730 with multiple frequency notches. MS3 precursors were fragmented by HCD and analyzed using  
731 the Orbitrap (NCE 65, AGC 3E5, maximum injection time 150 ms, resolution was 50,000 at 400  
732 Th).

733

#### 734 **Mass spectra data analysis**

735 Mass spectra were processed using a Sequest-based pipeline (Huttlin et al., 2010). Spectra were  
736 converted to mzXML using a modified version of ReAdW.exe. Database search included all  
737 entries from an indexed Ensembl database version 90 (downloaded:10/09/2017). This database  
738 was concatenated with one composed of all protein sequences in the reversed order. Searches  
739 were performed using a 50 ppm precursor ion tolerance for total protein level analysis. The  
740 product ion tolerance was set to 0.9 Da. TMT tags on lysine residues, peptide N termini  
741 (+229.163 Da), and carbamidomethylation of cysteine residues (+57.021 Da) were set as static  
742 modifications, while oxidation of methionine residues (+15.995 Da) was set as a variable  
743 modification.



744 Peptide-spectrum matches (PSMs) were adjusted to FDR < 0.01 (Elias and Gygi, 2007, 2010).  
745 PSM filtering was performed using a linear discriminant analysis (LDA), as described previously  
746 (Huttlin et al., 2010), while considering the following parameters: XCorr, ΔCn, missed cleavages,  
747 peptide length, charge state, and precursor mass accuracy. For TMT-based reporter ion  
748 quantitation, we extracted the summed signal-to-noise (S:N) ratio for each TMT channel and  
749 found the closest matching centroid to the expected mass of the TMT reporter ion. For protein-  
750 level comparisons, PSMs were identified, quantified, and collapsed to a peptide FDR < 0.01 and  
751 then collapsed further to a final protein-level FDR < 0.01, which resulted in a final peptide level  
752 FDR < 0.001. Moreover, protein assembly was guided by principles of parsimony to produce the  
753 smallest set of proteins necessary to account for all observed peptides. PSMs with poor quality,  
754 MS3 spectra with TMT reporter summed signal-to-noise of less than 100, or having no MS3  
755 spectra were excluded from quantification (McAlister et al., 2012).

756

### 757 **Filtering out peptides that contain polymorphisms**

758 Peptides that contain polymorphisms are problematic for protein quantification in genetically  
759 diverse samples because as the reference genome, only the B6 allele is quantified.  
760 Polymorphisms (with respect to the B6 genome) function as flags of the presence or absence of  
761 the B6 allele rather than reflecting the relative abundance of the peptide. During protein  
762 abundance estimation from peptides, a polymorphic peptide can either obscure the signal of a  
763 true abundance pQTL or induce a false local abundance pQTL. To avoid these biases, we filtered  
764 out peptides that contained polymorphisms based on the genome sequence of the founder  
765 strains and that were further confirmed in the data by having local founder haplotype effects  
766 that matched the expected distribution pattern of the B6 allele among the founder strains.

767 To determine whether peptides with polymorphisms matched their expected B6 allele  
768 distribution patterns, the peptide data was made more comparable by standardization within  
769 batches and removal of batch effects. Each peptide was scaled by a sample-specific within-

770 batch scaling factor:  $\tilde{y}_i^{\text{pep } k} = \frac{y_i^{\text{pep } k}}{\theta_i}$ , where  $y_i^{\text{pep } k}$  is the mass-spec intensity of peptide  $k$  for

771 mouse  $i$ ,  $\theta_i = \frac{\sum_K y_i^{\text{pep } k}}{\max_{l \in B[i]} (\sum_K y_l^{\text{pep } k})}$ ,  $K$  is the set of all peptides measured for mouse  $i$ , and  $B[i]$  is the

772 set of samples included in the mass-spec batch of mouse  $i$ . For the CC samples, the additional  
773 pooled sample (*i.e.*, bridge sample) was also included in each batch and provided an additional

774 standardization across batches:  $\tilde{\tilde{y}}_i^{\text{pep } k} = \log_2 \left( \frac{\tilde{y}_i^{\text{pep } k} + 1}{\tilde{y}_{b[i]}^{\text{pep } k} + 1} \right)$ , where  $b[i]$  represents the bridge

775 sample from the batch of mouse  $i$ . For the DO and founder strain samples that did not include

776 bridge samples,  $\tilde{\tilde{y}}_i^{\text{pep } k} = \log_2 (\tilde{y}_i^{\text{pep } k} + 1)$ . A log transformation is used because peptide

777 intensities are commonly log-linear.

778 Batch effects were removed from the processed peptide data using a linear mixed effect model  
779 (LMM) fit with the lme4 R package (Bates et al., 2015). Peptides unobserved for all samples  
780 within a batch were recorded as missing (coded as NA). If greater than 80% of samples were  
781 missing for a polymorphic peptide, it was removed from the batch correction step and the

782 subsequent evaluation of the B6 allele distribution pattern. The following model was fit for the  
 783 CC data:  
 784 Equation 1

$$785 \quad \tilde{y}_i^{\text{pep } k} = \mu + \mathbf{x}_{i, \text{covar}}^T \boldsymbol{\beta}_{\text{covar}} + u_{\text{strain}[i]} + u_{b[i]} + \varepsilon_i$$

786  
 787 where  $\mu$  is the intercept,  $\boldsymbol{\beta}_{\text{covar}}$  is the effect vector of covariates estimated as fixed effects,  
 788  $\mathbf{x}_{i, \text{covar}}^T$  is the  $i^{\text{th}}$  row of the covariate design matrix,  $u_{\text{strain}[i]}$  is the effect of the strain of sample  
 789  $i$ ,  $u_{b[i]}$  is the effect the batch of sample  $i$ , and  $\varepsilon_i$  is the error for sample  $i$  with  $\varepsilon_i \sim N(0, \sigma^2)$ . The  
 790 strain and batch effects were estimated as random effects:  $\mathbf{u}_{\text{strain}} \sim N(\mathbf{0}, \mathbf{I}\tau_{\text{strain}}^2)$  and  
 791  $\mathbf{u}_b \sim N(\mathbf{0}, \mathbf{I}\tau_b^2)$ . For the CC and founder strains, sex was included as a covariate. A similar model  
 792 was fit for the DO but with no strain effect and diet also included as a covariate with sex. The  
 793 batch effects, estimated with best linear unbiased predictors (BLUPs) using restricted maximum  
 794 likelihood estimates (REML; Patterson and Thompson 1971), were subtracted from each  
 795 peptide measurement:  $\tilde{\tilde{y}}_i^{\text{pep } k} = \tilde{y}_i^{\text{pep } k} - \hat{u}_{b[i]}$ .

796 For peptides expected to contain a polymorphism, we then fit local genetic effects: haplotype  
 797 effects at the marker closest to the TSS of the gene to which the peptide maps in the CC and DO  
 798 and strain effects in the founder strains.  
 799 Equation 2

$$800 \quad \tilde{\tilde{y}}_i^{\text{pep } k} = \mu + \text{local}[i] + \mathbf{x}_{i, \text{covar}}^T \boldsymbol{\beta}_{\text{covar}} + u_i^{\text{kinship}} + \varepsilon_i$$

801  
 802 where  $\text{local}_i$  is the effect of the local haplotype pair to peptide  $k$  for sample  $i$ ,  $u_i^{\text{kinship}}$   
 803 represents a random effect that accounts for the correlation structure between individuals that  
 804 is consistent with overall genetic relatedness, often referred to as the kinship effect, and all  
 805 other terms as previously defined. For the CC,  $\text{local}[i] = \mathbf{p}_i^T \boldsymbol{\beta}_{\text{local}}$  where  $\mathbf{p}_i^T$  is the founder  
 806 haplotype probability vector at the marker closest to the gene TSS (e.g., ordering the founder  
 807 strains as AJ, B6, 129, NOD, NZO, CAST, PWK, and WSB,  $\mathbf{p}_i^T = [0 \ 1 \ 0 \ 0 \ 0 \ 0 \ 0 \ 0]$  for a CC mouse  $i$   
 808 that is B6/B6 at the locus). For the DO,  $\text{local}[i] = \mathbf{d}_i^T \boldsymbol{\beta}_{\text{local}}$  where  $\mathbf{d}_i^T$  is the founder haplotype  
 809 dosage vector, scaled to sum to zero, at the marker closest to the gene TSS (e.g.,  $\mathbf{d}_i^T =$   
 810  $[0.5 \ 0.5 \ 0 \ 0 \ 0 \ 0 \ 0 \ 0]$  for a DO mouse  $i$  that is AJ/B6 at the locus). For the founder strains,  
 811  $\text{local}_i = \mathbf{x}_{i, \text{strain}}^T \boldsymbol{\beta}_{\text{local}}$  where  $\mathbf{x}_{i, \text{strain}}^T$  is the founder strain incidence vector for mouse  $i$  (e.g.,  
 812  $\mathbf{x}_{i, \text{strain}}^T = [0 \ 1 \ 0 \ 0 \ 0 \ 0 \ 0 \ 0]$  for a B6 mouse).  $\boldsymbol{\beta}_{\text{local}}$  is an eight-element vector of founder  
 813 haplotype effects, fit as a random effect:  $\boldsymbol{\beta}_{\text{local}} \sim N(\mathbf{0}, \mathbf{I}\tau_{\text{local}}^2)$  where  $\mathbf{I}$  is an  $8 \times 8$  identity matrix  
 814 and  $\tau_{\text{local}}^2$  is the variance component underlying the local effects. The kinship effect is included  
 815 for the CC and DO and modeled as  $\mathbf{u}^{\text{kinship}} \sim N(\mathbf{0}, \mathbf{G}\tau_G^2)$  where  $\mathbf{G}$  is a realized genomic  
 816 relationship matrix and  $\tau_G^2$  is the variance component underlying the kinship effect, accounting  
 817 for population structure (Kang et al., 2008, 2010; Lippert et al., 2011; Zhou and Stephens,  
 818 2012). Here we used a leave-one-chromosome-out or “loco”  $\mathbf{G}$ , in which markers from the  
 819 chromosome the peptide is predicted to be located on are excluded from  $\mathbf{G}$  estimation in order  
 820 to avoid the kinship term absorbing some of  $\text{local}[i]$  (Wei and Xu, 2016). We then calculated  
 821  $r_{\text{poly}} = \text{cor}(\hat{\boldsymbol{\beta}}_{\text{local}}, \mathbf{q})$ , the Pearson correlation coefficient between  $\hat{\boldsymbol{\beta}}_{\text{local}}$ , the BLUP of  $\boldsymbol{\beta}_{\text{local}}$  and

822  $\mathbf{q}$ , the incidence vector of the B6 allele among the founder strains (*e.g.*,  $\mathbf{q} = [0\ 1\ 0\ 0\ 0\ 0\ 0]$ )  
 823 for a peptide with a B6 allele that is missing in the other founder strains). Sets of peptides with  
 824 polymorphisms were defined based on having  $r_{\text{poly}} > 0.5$  for each of the CC, DO, and founder  
 825 strains, to be excluded from further analysis because they would bias protein abundance  
 826 estimation.

827

### 828 Protein abundance estimation from peptides

829 Protein abundances were estimated from their component peptides after filtering out peptides  
 830 that possessed polymorphisms based on founder strain sequences that were confirmed in the  
 831 peptide data. The abundance for protein  $j$  is calculated as  $y_i^{\text{prot } j} = \frac{\sum_M y_i^{\text{pep } m} 1_{i,m}}{\theta_i}$  where  $M$  is the  
 832 set of peptides that map to protein  $j$ ,  $1_{i,m}$  is the indicator function that peptide  $m$  was  
 833 observed in mouse  $i$ , and  $\theta_i$  is the scaling factor previously defined (Huttlin et al., 2010). Similar  
 834 to the previously described peptide normalization in the CC, proteins were scaled relative to the  
 835 bridge sample (pooled sample of all CC mice included in all batches) and log-transformed:

836  $\tilde{y}_i^{\text{prot } j} = \log_2 \left( \frac{y_i^{\text{prot } j} + 1}{y_{b[i]}^{\text{prot } j} + 1} \right)$ . For the DO and founder strain samples, there was no bridge sample,

837 and proteins were instead normalized as:  $\tilde{y}_i^{\text{prot } j} = \log_2(y_i^{\text{prot } j} + 1)$ .

838 Batch effects were removed from the protein data using the same LMM approach described for  
 839 the peptide data (Equation 1). If more than 50% of samples were missing a protein, it was  
 840 removed from further analysis. Batch effects, estimated as BLUPs, were then removed:

841  $\tilde{\tilde{y}}_i^{\text{prot } j} = \tilde{y}_i^{\text{prot } j} - \hat{u}_{b[i]}$ .

842

### 843 Heritability estimation

844 We estimated heritability for all proteins in the CC, DO, and founder strains. The heritability  
 845 model is similar to Equation 2, but for proteins instead of peptides and without the local[ $i$ ]  
 846 term:

847 Equation 3

$$848 \tilde{\tilde{y}}_i^{\text{prot } j} = \mu + \mathbf{x}_{i, \text{covar}}^T \boldsymbol{\beta}_{\text{covar}} + u_i^{\text{kinship}} + \varepsilon_i$$

849

850 where terms are as previously defined. The genomic relationship matrix  $\mathbf{G}$  – corresponding to  
 851 the kinship term  $\mathbf{u}^{\text{kinship}} \sim N(\mathbf{0}, \mathbf{G}\tau_G^2)$  for the CC and DO – is estimated from all markers –“non-  
 852 loco”  $\mathbf{G}$  – because there are no other genetic terms in the model. In the founder strains,  $\mathbf{G} =$   
 853  $\mathbf{X}_{\text{strain}} \mathbf{X}_{\text{strain}}^T$  where  $\mathbf{X}_{\text{strain}}$  is the founder strain incidence matrix. Sex was modeled as a  
 854 covariate for all three populations, and diet as well in the DO. Heritability is then calculated as

$$855 h^2 = \frac{\tau_G^2}{\tau_G^2 + \sigma^2}.$$

856

### 857 QTL analysis

858 In the CC and DO, we performed a genome-wide pQTL scan for each protein, testing a QTL  
 859 effect at positions across the genome, using a model similar to Equation 2:

860 Equation 4

$$861 \quad \tilde{z}_i^{\text{prot } j} = \mu + \text{QTL}_m[i] + \mathbf{x}_{i, \text{covar}}^T \boldsymbol{\beta}_{\text{covar}} + u_i^{\text{kinship}} + \varepsilon_i$$

862

863 where  $\tilde{z}_i^{\text{prot } j}$  is the standard normal quantile returned by the inverse cumulative distribution  
864 function of the normal distribution on the uniform percentiles defined by the ranks of  $\tilde{\mathbf{y}}^{\text{prot } j}$ ,  
865 *i.e.*, the rank-based inverse normal transformation (RINT) (Beasley et al., 2009) of protein  $j$  for  
866 individual  $i$ ,  $\text{QTL}_m[i]$  is the effect of the putative QTL at marker  $m$  on protein  $j$  for individual  $i$ ,  
867 equivalent to the  $\text{local}[i]$  term in Equation 2 for the CC and DO, and all other terms as  
868 previously defined. The kinship effect was fit based on the “loco”  $\mathbf{G}$  specific to the chromosome  
869 of marker  $m$ . We used RINT for the QTL analysis to reduce the influence of extreme  
870 observations that can produce false positives, particularly when they coincide with a rare  
871 founder haplotype allele, which are of particular concern in the context of a CC sample  
872 population with 58 unique genomes. To test the QTL term, the model in Equation 4 is compared  
873 to a null model excluding  $\text{QTL}_m$ , summarized as the  $\log_{10}$  likelihood ratio (LOD) score.

874 The QTL model in Equation 4 was also used for variant association mapping at specific pQTL  
875 identified through the haplotype-based analysis by adjusting the  $\text{QTL}_m[i]$  term:  $\text{QTL}_v[i] =$   
876  $\mathbf{p}_{i,v}^T \boldsymbol{\beta}_{\text{QTL}}$ , where  $\mathbf{p}_{i,v}^T$  is the marginal variant allele probability vector for variant  $v$ , which is  
877 calculated by collapsing and simplifying the underlying founder haplotype probabilities based  
878 on the known variant genotype in the founder strains (SQLite variant database:  
879 <https://doi.org/10.6084/m9.figshare.5280229.v3>).

880 For the CC, we mapped pQTL based on strain averages where  $\tilde{z}_i^{\text{prot } j}$  is the average  
881 of  $\tilde{\mathbf{y}}_{\text{male, strain } i}^{\text{prot } j}$  and  $\tilde{\mathbf{y}}_{\text{female, strain } i}^{\text{prot } j}$  followed by RINT across the population of strains. Founder  
882 haplotype probabilities were reconstructed at the level of individual mice and were also  
883 averaged at all markers for strain-level mapping. A strain-level  $\mathbf{G}$  was then estimated from the  
884 strain-level founder haplotype probabilities. No fixed effect covariates were included when  
885 mapping on strain averages. We tried mapping pQTL in the CC on individual-level data, which  
886 returned largely consistent results, but notably fewer and weaker pQTL. In the CC, we also  
887 mapped pQTL to the mitochondrial genome and Y chromosome by testing whether the founder  
888 origin of the mitochondria or Y chromosome was associated with protein abundance. We fit  
889 Equation 4, treating the mitochondrial genome or Y chromosome as a single locus  $\text{QTL}_Y[i]$  and  
890  $\text{QTL}_{\text{MT}}[i]$ , respectively, using the “non-loco”  $\mathbf{G}$  for the kinship effect. The founder strain of  
891 origin for the Y chromosome was determined for all CC strains. For the mitochondrial genome,  
892 six strains (CC031, CC032, CC041, CC051, CC059, CC072) possessed ambiguity between AJ and  
893 NOD, which we encoded as equal probabilities ( $\mathbf{p}_{i,\text{MT}}^T = [0.5 \ 0 \ 0 \ 0.5 \ 0 \ 0 \ 0]$ ).

894

### 895 QTL significance thresholds

896 We estimated significance thresholds for pQTL using permutations (Doerge and Churchill,  
897 1996). We accounted for varying levels of missing data by performing genome scans on 10,000  
898 permutations of the normal quantiles for each level of observed missingness in the CC and DO  
899 (ranging from 0 to 50%). Genome scans of the permuted data used the model in Equation 4,  
900 while excluding covariates and the kinship term, allowing permutations to be more applicable

901 across proteins with the same level of missingness. To control the genome-wide error rate per  
 902 protein and the FDR across proteins (Chesler et al., 2005), the maximum LOD scores from the  
 903 permutation scans were used to fit generalized extreme value distributions (GEV) (Dudbridge  
 904 and Koeleman, 2004; Valdar et al., 2009) specific to the level of missingness, which were used  
 905 to calculate genome-wide permutation  $p$ -values for the maximum LOD observed per protein:

906 *Equation 5*

$$p_{\text{perm}}^{\text{prot } j} = 1 - F_{\text{GEV}, n_{\text{NA}}[\text{prot } j]}(\text{max LOD}[\text{prot } j])$$

907  
 908 where  $F_{\text{GEV}, n_{\text{NA}}[\text{prot } j]}$  is the cumulative density function for the GEV fit from the permutations  
 909 of quantiles with  $n_{\text{NA}}$  number missing values, corresponding to the number missing for protein  
 910  $j$ , and  $\text{max LOD}[\text{prot } j]$  is the maximum LOD score from the genome scan of protein  $j$ . We then  
 911 used the Benjamini-Hochberg (BH) procedure (Benjamini and Hochberg, 1995) to calculate FDR  
 912  $q$ -values from all observed permutation  $p$ -values, which were used to interpolate a permutation  
 913  $p$ -value that corresponds to  $\text{FDR} < \alpha$ :  $p_{\text{perm}, \alpha}^{\text{interp}}$  where  $\alpha \in [0.1, 0.5]$ . Significance thresholds on  
 914 the LOD scale, specific to  $\text{FDR} < \alpha$  and  $n_{\text{NA}}$  missing data points, were calculated:

915  $\lambda_{\text{FDR} < \alpha}^{n_{\text{NA}}} = F_{\text{GEV}, n_{\text{NA}}}^{-1}(1 - p_{\text{perm}, \alpha}^{\text{interp}})$  where  $F_{\text{GEV}, n_{\text{NA}}}^{-1}$  is the inverse cumulative density function  
 916 for the GEV with  $n_{\text{NA}}$  missing data points. As a final step to reduce random variation between  
 917 sets of permutations, we regressed the estimated thresholds for a population and FDR level on  
 918 the number of missing data points  $n_{\text{NA}}$ , and created a table of fitted thresholds:  $\hat{\lambda}_{\text{FDR} < \alpha}^{n_{\text{NA}}}$  for  $\alpha \in$   
 919  $[0.1, 0.5]$  for both the CC and DO. Whether a pQTL met  $\text{FDR} < \alpha$  significance, the threshold  
 920 corresponding to  $\alpha$  with the  $n_{\text{NA}}$  for protein  $j$  was used. For reference,  $\hat{\lambda}_{\text{FDR} < 0.1}^0 = 7.89$  and  
 921  $\hat{\lambda}_{\text{FDR} < 0.5}^0 = 6.30$  in the CC, and  $\hat{\lambda}_{\text{FDR} < 0.1}^0 = 7.87$  and  $\hat{\lambda}_{\text{FDR} < 0.5}^0 = 6.44$  in the DO.

923

## 924 **Consistency of QTL between the CC and DO**

925 We evaluated the consistency of pQTL between the CC and DO by comparing their haplotype  
 926 effects. Haplotype effects were estimated at the pQTL marker using the model in Equation 4. To  
 927 stabilize the effects, they were modeled as a random effect:  $\beta_{\text{QTL}} \sim N(\mathbf{0}, \mathbf{I}\tau_{\text{QTL}}^2)$ , where  $\tau_{\text{QTL}}^2$  is a  
 928 variance component underlying the haplotype effects of the pQTL. We then estimated the  
 929 haplotype effects as BLUPs ( $\tilde{\beta}_{\text{QTL}}$ ). To declare pQTL consistent between the CC and DO, we  
 930 evaluated whether their haplotype effects were significantly positively correlated:  $p_{\text{QTL}}^r =$   
 931  $\Pr(r_{\text{QTL}} > 0)$  where  $r_{\text{QTL}} = \text{cor}(\tilde{\beta}_{\text{QTL}}^{\text{CC}}, \tilde{\beta}_{\text{QTL}}^{\text{DO}})$  and  $r_{\text{QTL}}\sqrt{6}(1 - r_{\text{QTL}}^2)^{-1} \sim t_{(6)}$ . To account for  
 932 multiple testing, we used the BH procedure on the  $p$ -values for correlated effects and declared  
 933 pQTL with  $q_{\text{QTL}}^r < 0.1$  as consistent between the CC and DO.

934 Selecting which marker to fit the haplotype effects at is complicated by the fact that the CC and  
 935 DO have different sets of markers and the genomic coordinate of the peak LOD score is also  
 936 subject to variation. When comparing pQTL detected in both populations, we fit Equation 4 at  
 937 the markers with the highest LOD score specific to each population, meaning they may not be  
 938 the markers closest to each other. When comparing pQTL that were detected in only one  
 939 population, we selected the marker in the population that failed to map the pQTL that was  
 940 closest to the marker in the population that detected it.

941

## 942 Consistency of local QTL in the CC with the founder strains

943 If the genetic effects on a protein are primarily local, the relative abundances for a protein in  
944 the founder strains should match the local pQTL effects observed in the CC and DO, which can  
945 be used to confirm findings and better support suggestive pQTL in the CC or DO. We evaluated  
946 the consistency of local pQTL in the CC with the founder strains, using an approach similar to  
947 how we compared pQTL effects between the CC and DO. For the founder strains, rather than  
948 fitting pQTL effects ( $\tilde{\beta}_{\text{QTL}}$ ), we fit the founder effects as random terms (as described for the  
949 local term in Equation 2 for the founder strains) summarized as BLUPs ( $\tilde{\beta}_{\text{strain}}^{\text{Founders}}$ ). We then  
950 calculated the Pearson correlation between local pQTL effects in the CC and founder effects in  
951 the founder strains:  $r_{\text{local}} = \text{cor}(\tilde{\beta}_{\text{QTL}}^{\text{CC}}, \tilde{\beta}_{\text{strain}}^{\text{Founders}})$ . As when comparing QTL effects between the  
952 CC and DO, we then tested  $r_{\text{local}} > 0$ , and corrected for multiple testing through the BH  
953 procedure.

954

## 955 Mediation analysis

956 We performed mediation analysis on each distal pQTL with LOD > 6 in the CC or DO, which  
957 involved a scan analogous to the QTL genome scans. The underlying model is

958 *Equation 5*

$$959 \quad \tilde{z}_i^{\text{prot } t} = \mu + \text{QTL}[i] + \mathbf{x}_{i, \text{covar}}^T \boldsymbol{\beta}_{\text{covar}} + \text{mediator}_q[i] + \varepsilon_i$$

960

961 where  $\text{QTL}[i]$  is as defined for  $\text{QTL}_m[i]$  in Equation 4, but fixed at the marker  $m$  of the  
962 detected distal pQTL for target protein  $t$ ,  $\text{mediator}_q[i]$  is the effect of candidate mediator  
963 protein  $q$  on protein  $t$  for individual  $i$ , and all other terms as previously defined. The effect of  
964 the mediator is modeled as:  $\text{mediator}_q[i] = \beta_{\text{prot } q} \tilde{z}_i^{\text{prot } q}$ , where  $\beta_{\text{prot } q}$  is the regression  
965 coefficient for the mediator protein  $q$  and  $\tilde{z}_i^{\text{prot } q}$  is the RINT quantity of protein  $q$  for individual  
966  $i$ . The likelihood of Equation 5 is compared to a null QTL model that excludes the  $\text{QTL}_i$  term,  
967 producing a mediation LOD score. The mediation model is fit for all proteins as mediators,  
968 excluding protein  $t$ , resulting in a mediation scan.

969 We assume that the vast majority of candidates are not true mediators of a specific pQTL and  
970 thus the distribution of mediation LOD scores approximates a null distribution. Assuming that  
971 the null distribution is approximately normal, we calculate the z-scores of the mediation LOD  
972 scores, and define mediators of the QTL at marker  $m$  for protein  $t$  as proteins with  $z_q^{\text{med}} < -4$ ,  
973 where  $z_q^{\text{med}}$  is the z-score of the mediation LOD score for candidate mediator protein  $q$ . The  
974 rationale being that when testing the QTL term in Equation 5, if the mediator contains some of  
975 the information of the QTL, its presence in both the alternative and null models will result in a  
976 large drop in the LOD score of the detected pQTL. In order for a mediator to be a clear  
977 candidate driver of the distal pQTL, we required that the mediator TSS be within 10 Mbp of the  
978 pQTL marker. Strong mediators that were not near the pQTL often represent proteins that are  
979 correlated with protein  $t$ , such as co-regulated members of a protein-complex.

980

## 981 Sex effects on proteins analysis

982 Proteins that exhibited differential abundance between the sexes, *i.e.*, sex effects, were  
983 identified using an LMM similar to the heritability model (Equation 3) for the CC, DO, and  
984 founder strains, but instead testing the significance of the sex coefficient:

985 *Equation 6*

$$986 \tilde{y}_i^{\text{prot } j} = \mu + \beta_{\text{Male}} x_{i, \text{Male}} + \mathbf{x}_{i, \text{covar}}^T \boldsymbol{\beta}_{\text{covar}} + u_i^{\text{kinship}} + \varepsilon_i$$

987

988 where  $\beta_{\text{Male}}$  is the effect on protein  $j$  of being male,  $x_{i, \text{Male}}$  is an indicator variable of being  
989 male, and all other terms as defined previously. Non-sex covariates and the specification of  
990  $u_i^{\text{kinship}}$  for the different populations are the same as described for heritability.

991 A  $p$ -value for the sex effect was calculated by comparing the model in Equation 6 to a null  
992 model without the sex effect through the likelihood ratio test (LRT):  $p_{\text{sex}}^{\text{prot } j} = \Pr(X > \hat{\chi}_{\text{prot } j}^2)$   
993 where  $\Pr(\cdot)$  denotes the  $\chi_{(1)}^2$  probability density function and  $\hat{\chi}_{\text{prot } j}^2$  is the observed LRT  
994 statistic for protein  $j$ . The LMM was fit with the `qtl2` R package (Broman et al., 2019), using  
995 maximum likelihood estimates (MLE) for parameters rather than REML, which are more  
996 appropriate for asymptotic-based significance testing of fixed effects. Proteins with significant  
997 sex effects were selected based on FDR < 0.1 using the BH procedure (Benjamini and Hochberg  
998 1995).

999 We performed gene set enrichment analysis through the `clusterProfiler` R package (Yu et al.,  
1000 2012). We defined gene sets based on having  $q_{\text{sex}} < 0.01$  and split them further into subsets  
1001 based on having higher abundance in males or higher abundance in females for both the CC  
1002 and DO. We used the quantified proteins in each population as the background gene set to  
1003 account for biases in the observed proteins. Hypergeometric set tests for enrichment of GO and  
1004 KEGG terms were performed with FDR multiple testing control (Storey et al., 2019). Enriched  
1005 GO and KEGG terms were selected based on having  $q_{\text{set}} < 0.1$ .

1006

## 1007 Protein-complex analysis

1008 We categorized individual proteins as members of protein-complexes as defined by previous  
1009 annotations (Ori et al., 2016). For each protein-complex, we quantified how tightly co-  
1010 abundant, *i.e.*, cohesive, the members are, by calculating the median pairwise Pearson  
1011 correlation for each protein with the other members of the protein-complex. We summarized  
1012 cohesiveness within a protein-complex by recording the median and interquartile range across  
1013 the median correlations for the individual proteins.

1014 To assess whether genetics or sex regulated protein-complexes as a whole, we estimated the  
1015 complex-heritability and complex-sex effect size. We took the PC1 from the set of proteins from  
1016 the complex after first removing the effects of key covariates from the individual proteins in  
1017 order to keep the PC1 from reflecting other drivers of variation instead of genetic factors or sex.  
1018 For complex-heritability, we removed the effect of sex in the CC, and both sex and diet in the  
1019 DO. For complex-sex effect size, we only removed the effect of diet from the DO. Complex-  
1020 heritability was estimated using the model in Equation 3, with no covariates and the complex

1021 PC1 as the outcome. To estimate the complex-sex effect size:  $\phi_{\text{sex}}^2 = 1 -$   
1022  $(\sum_i e_i^2 | M_A) / (\sum_i e_i^2 | M_0)$  where  $\sum_i e_i^2 | M_A$  is the sum of squared residuals (SSR) under the  
1023 alternative model (Equation 6) and  $\sum_i e_i^2 | M_0$  is the SSR under the null model (Equation 6  
1024 excluding sex effect). Interval estimates for complex-heritability and complex-sex effect size  
1025 represent 95% subsample intervals. We randomly sampled without replacement 80 of the CC  
1026 and DO data 1,000 times and estimated the complex-heritability and complex-sex effect size for  
1027 each subsample as well as the 2.5<sup>th</sup> and 97.5<sup>th</sup> quantiles across the subsamples. We estimated  
1028 summaries for protein-complexes that had four or more proteins observed in the CC or DO,  
1029 after removing proteins with local pQTL (FDR < 0.5) or distal pQTL (FDR < 0.1), limiting the  
1030 potential that the PC1 reflects a strong pQTL not shared by other members of the complex.

1031

### 1032 **Strain-protein outlier analysis**

1033 To identify CC strains with consistent extreme effects in both the female and male, we fit an  
1034 LMM:

1035 *Equation 8*

$$1036 \quad \tilde{y}_i^{\text{prot } j} = \mu + \beta_{\text{Male}} x_{i, \text{Male}} + u_{\text{strain}[i]} + \varepsilon_i$$

1037

1038 with all terms as previously defined. Effects for all CC strains for each protein  $j$  ( $\hat{u}_{\text{strain}}^{\text{prot } j}$ ) were  
1039 estimated as BLUPs, which were then transformed to z-scores per protein ( $z_{\text{strain}}^{\text{prot } j}$ ). We defined  
1040 a strain-protein outlier to be a protein  $j$  in CC strain  $i$  for which  $|z_{\text{strain } i}^{\text{prot } j}| > 2.5$ . We intersected  
1041 the strain-protein outliers with known CC strain-private genetic variants (Srivastava et al.,  
1042 2017), identifying CC strain-private variants that likely have local effects on protein abundance.  
1043 We permuted the pairings between CC strain and protein for the 6,046 strain-protein outliers  
1044 to determine if the observed overlap of 69 privates was significant.

1045 For each CC strain  $i$ , we defined sets of proteins that had consistently high, low, and extreme  
1046 abundance based on their strain effects:  $\Omega_{\text{strain } i}^{\text{high}} = \{\text{prot } j: z_{\text{strain } i}^{\text{prot } j} > 2.5\} \forall j$ ,  $\Omega_{\text{strain } i}^{\text{low}} =$   
1047  $\{\text{prot } j: z_{\text{strain } i}^{\text{prot } j} < -2.5\} \forall j$ , and  $\Omega_{\text{strain } i}^{\text{extreme}} = \{\text{prot } j: |z_{\text{strain } i}^{\text{prot } j}| > 2.5\} \forall j$ , respectively. We then  
1048 tested whether the CC strain-specific sets were enriched in GO and KEGG terms ( $q_{\text{set}} < 0.1$ ), as  
1049 done with proteins with sex effects.

1050

### 1051 **Data and software availability**

1052 All analyses were performed using the R statistical programming language (v3.6.1) (R Core  
1053 Team, 2018). The scripts and processed data used to generate the results are available at  
1054 figshare (<https://doi.org/10.6084/m9.figshare.12818717>). All processed data and pQTL results  
1055 are available for download and interactive analysis using the QTLViewer webtool for both the  
1056 CC (<https://churchilllab.jax.org/qtlviewer/CC/Ferris>) and DO  
1057 (<https://churchilllab.jax.org/qtlviewer/DO/Svenson>). The mass-spec proteomics data for the CC  
1058 liver samples have been deposited in ProteomeXchange (<http://www.proteomexchange.org/>)  
1059 via the PRIDE partner repository with dataset identifier PXD018886. The mass-spec data for the



1060 DO and founder strain liver samples were previously deposited to ProteomeXchange with  
1061 dataset identifier PXD002801.

1062

### 1063 **Acknowledgements**

1064 We would like to thank the members of the Churchill lab for feedback during the development  
1065 of this project and in the process of composing the manuscript. We would also like to thank  
1066 Lauren J. Donoghue of the University of North Carolina at Chapel Hill, John W. Keele of the  
1067 United States Department of Agriculture, Paul L. Maurizio of the University of Chicago, and  
1068 Bryan C. Quach of the Research Triangle Institute for their feedback on this manuscript. This  
1069 work has been supported by grants from the National Institutes of Health (NIH): F32GM134599  
1070 to G.R.K.; U19AI100625, P01AI132130, and R01ES029925 to F.P.-M.V. and M.T.F.;  
1071 R01GM067945 to S.P.G; and R01GM070683 to G.A.C.

1072

### 1073 **Author contributions**

1074 Conceptualization, M.T.F., S.P.G., and G.A.C.; Methodology, G.R.K., T.Z., S.P.G., and G.A.C.;  
1075 Software, G.R.K, D.P., and M.V.; Investigation, G.R.K. and T.Z.; Resources, T.Z., T.A.B., P.H.,  
1076 G.D.S., F.P-M.V., M.T.F., and S.P.G.; Data Curation, G.R.K, T.Z., and M.V.; Writing – Original  
1077 Draft, G.R.K., T.Z., and G.A.C.; Writing – Review & Editing; Visualization, G.R.K.; Supervision,  
1078 S.C.M., M.T.F., S.P.G., and G.A.C.; Funding Acquisition, F.P-M.V., M.T.F., S.P.G., and G.A.C.

1079

### 1080 **Declarations of interests**

1081 The authors declare no competing interests.

1082

### 1083 **Supplemental Information**

1084 Table S1. Heritability and sex effects for the proteins analyzed in the CC, DO, and founder  
1085 strains, related to **Figure 1**

1086

1087 Table S2. Detected pQTL (LOD > 6) in the CC and DO, related to **Figures 2 and S1**

1088

1089 Table S3. Consistency of haplotype effects for pQTL detected (FDR < 0.5) in the CC and DO,  
1090 related to **Figures 2 and S1**

1091

1092 Table S4. Mediation results for distal pQTL detected (LOD > 6) in the CC and DO, related to  
1093 **Figures 2 and S1**

1094

1095 Table S5. Annotated protein-complexes (Ori et al., 2016) used in this study, with added mouse  
1096 ENSEMBL gene IDs and the numbers of member proteins observed in each mouse population,  
1097 related to **Figures 3 and S4**

1098

1099 Table S6. Summaries on heritability, pQTL, and sex effect size for individual proteins annotated  
1100 to protein-complexes, related to **Figures 3 and S4**

1101

- 1102 Table S7. Summaries of cohesiveness, heritability, and sex effect size for protein-complexes,  
1103 related to **Figures 3** and **S4**  
1104
- 1105 Table S8. Gene ontology enrichment results of proteins with extreme abundances specific to  
1106 individual CC strains, related **Figures 7** and **S7**  
1107
- 1108 Table S9. KEGG enrichment results of proteins with extreme abundances specific to individual  
1109 CC strains, related **Figures 7** and **S7**  
1110
- 1111 **References**
- 1112 Albert, F.W., Bloom, J.S., Siegel, J., Day, L., and Kruglyak, L. (2018). Genetics of trans-regulatory  
1113 variation in gene expression. *Elife* 7, 1–39.
- 1114 Anderson, M.G., Smith, R.S., Hawes, N.L., Zabaleta, A., Chang, B., Wiggs, J.L., and John, S.W.M.  
1115 (2002). Mutations in genes encoding melanosomal proteins cause pigmentary glaucoma in  
1116 DBA/2J mice. *Nat. Genet.* 30, 81–85.
- 1117 Ashbrook, D.G., Arends, D., Prins, P., Mulligan, M.K., Roy, S., Williams, E.G., Lutz, C.M.,  
1118 Valenzuela, A., Bohl, C.J., Ingels, J.F., et al. (2019). The expanded BXD family of mice: A cohort  
1119 for experimental systems genetics and precision medicine. *BioRxiv* 672097.
- 1120 Baron, R.M., and Kenny, D.A. (1986). The moderator–mediator variable distinction in social  
1121 psychological research: Conceptual, strategic, and statistical considerations. *J. Pers. Soc.*  
1122 *Psychol.* 51, 1173–1182.
- 1123 Bates, D., Mächler, M., Bolker, B., and Walker, S. (2015). Fitting Linear Mixed-Effects Models  
1124 Using lme4. *J. Stat. Softw.* 67.
- 1125 Battle, A., Khan, Z., Wang, S.H., Mitrano, A., Ford, M.J., Pritchard, J.K., and Gilad, Y. (2015).  
1126 Genomic variation. Impact of regulatory variation from RNA to protein. *Science* 347, 664–667.
- 1127 Beasley, T.M., Erickson, S., and Allison, D.B. (2009). Rank-Based Inverse Normal Transformations  
1128 are Increasingly Used, But are They Merited? *Behav. Genet.* 39, 580–595.
- 1129 Benjamini, Y., and Hochberg, Y. (1995). Controlling the False Discovery Rate : A Practical and  
1130 Powerful Approach to Multiple Testing. *J. R. Stat. Soc. Ser. B* 57, 289–300.
- 1131 Broman, K.W., Gatti, D.M., Simecek, P., Furlotte, N.A., Prins, P., Sen, Ś., Yandell, B.S., and  
1132 Churchill, G.A. (2019). R/qtl2: Software for Mapping Quantitative Trait Loci with High-  
1133 Dimensional Data and Multiparent Populations. *Genetics* 211, 495–502.
- 1134 Chesler, E.J., Lu, L., Shou, S., Qu, Y., Gu, J., Wang, J., Hsu, H.C., Mountz, J.D., Baldwin, N.E.,  
1135 Langston, M.A., et al. (2005). Complex trait analysis of gene expression uncovers polygenic and  
1136 pleiotropic networks that modulate nervous system function. *Nat. Genet.* 37, 233–242.
- 1137 Chick, J.M., Munger, S.C., Simecek, P., Huttlin, E.L., Choi, K., Gatti, D.M., Raghupathy, N.,  
1138 Svenson, K.L., Churchill, G.A., and Gygi, S.P. (2016). Defining the consequences of genetic  
1139 variation on a proteome-wide scale. *Nature* 534, 500–505.
- 1140 Churchill, G., Gatti, D., Munger, S., and Svenson, K. (2012). The Diversity outbred mouse

- 1141 population. *Mamm. Genome* 23, 713–718.
- 1142 Churchill, G.A., Airey, D.C., Allayee, H., Angel, J.M., Attie, A.D., Beatty, J., Beavis, W.D., Belknap,  
1143 J.K., Bennett, B., Berrettini, W., et al. (2004). The Collaborative Cross, a community resource for  
1144 the genetic analysis of complex traits. *Nat. Genet.* 36, 1133–1137.
- 1145 Collaborative Cross Consortium (2012). The Genome Architecture of the Collaborative Cross  
1146 Mouse Genetic Reference Population. *Genetics* 190, 389–401.
- 1147 Doerge, R., and Churchill, G. (1996). Permutation tests for multiple loci affecting a quantitative  
1148 character. *Genetics* 142, 285–294.
- 1149 Dudbridge, F., and Koeleman, B.P.C. (2004). Efficient Computation of Significance Levels for  
1150 Multiple Associations in Large Studies of Correlated Data, Including Genomewide Association  
1151 Studies. *Am. J. Hum. Genet.* 75, 424–435.
- 1152 Elias, J.E., and Gygi, S.P. (2007). Target-decoy search strategy for increased confidence in large-  
1153 scale protein identifications by mass spectrometry. *Nat. Methods* 4, 207–214.
- 1154 Elias, J.E., and Gygi, S.P. (2010). Target-Decoy Search Strategy for Mass Spectrometry-Based  
1155 Proteomics. In *Methods in Molecular Biology* (Clifton, N.J.), S.J. Hubbard, and A.R. Jones, eds.  
1156 (Totowa, NJ: Humana Press), pp. 55–71.
- 1157 French, J.E., Gatti, D.M., Morgan, D.L., Kissling, G.E., Shockley, K.R., Knudsen, G.A., Shepard,  
1158 K.G., Price, H.C., King, D., Witt, K.L., et al. (2015). Diversity Outbred Mice Identify Population-  
1159 Based Exposure Thresholds and Genetic Factors that Influence Benzene-Induced Genotoxicity.  
1160 *Environ. Health Perspect.* 123, 237–245.
- 1161 Gatti, D.M., Svenson, K.L., Shabalina, A., Wu, L.-Y., Valdar, W., Simecek, P., Goodwin, N., Cheng,  
1162 R., Pomp, D., Palmer, A., et al. (2014). Quantitative Trait Locus Mapping Methods for Diversity  
1163 Outbred Mice. *G3 (Bethesda)*. 4, 1623–1633.
- 1164 Giurgiu, M., Reinhard, J., Brauner, B., Dunger-Kaltenbach, I., Fobo, G., Frishman, G., Montrone,  
1165 C., and Ruepp, A. (2019). CORUM: the comprehensive resource of mammalian protein  
1166 complexes—2019. *Nucleic Acids Res.* 47, D559–D563.
- 1167 Gralinski, L.E., Ferris, M.T., Aylor, D.L., Whitmore, A.C., Green, R., Frieman, M.B., Deming, D.,  
1168 Menachery, V.D., Miller, D.R., Buus, R.J., et al. (2015). Genome Wide Identification of SARS-CoV  
1169 Susceptibility Loci Using the Collaborative Cross. *PLoS Genet.* 11, e1005504.
- 1170 Gygi, J.P., Yu, Q., Navarrete-Perea, J., Rad, R., Gygi, S.P., and Paulo, J.A. (2019). Web-Based  
1171 Search Tool for Visualizing Instrument Performance Using the Triple Knockout (TKO) Proteome  
1172 Standard. *J. Proteome Res.* 18, 687–693.
- 1173 Hamilton-Williams, E.E., Wong, S.B.J., Martinez, X., Rainbow, D.B., Hunter, K.M., Wicker, L.S.,  
1174 and Sherman, L.A. (2010). Idd9.2 and Idd9.3 Protective Alleles Function in CD4+ T-Cells and  
1175 Nonlymphoid Cells to Prevent Expansion of Pathogenic Islet-Specific CD8+ T-Cells. *Diabetes* 59,  
1176 1478–1486.
- 1177 He, B., Shi, J., Wang, X., Jiang, H., and Zhu, H. (2020). Genome-wide pQTL analysis of protein  
1178 expression regulatory networks in the human liver. *BMC Biol.* 18, 97.

- 1179 Huttlin, E.L., Jedrychowski, M.P., Elias, J.E., Goswami, T., Rad, R., Beausoleil, S.A., Villén, J., Haas,  
1180 W., Sowa, M.E., and Gygi, S.P. (2010). A Tissue-Specific Atlas of Mouse Protein Phosphorylation  
1181 and Expression. *Cell* *143*, 1174–1189.
- 1182 Huttlin, E.L., Bruckner, R.J., Navarrete-Perea, J., Cannon, J.R., Baltier, K., Gebreab, F., Gygi, M.P.,  
1183 Thornock, A., Zarraga, G., Tam, S., et al. (2020). Dual Proteome-scale Networks Reveal Cell-  
1184 specific Remodeling of the Human Interactome. *BioRxiv* 2020.01.19.905109.
- 1185 Imai, K., Keele, L., and Yamamoto, T. (2010). Identification, Inference and Sensitivity Analysis for  
1186 Causal Mediation Effects. *Stat. Sci.* *25*, 51–71.
- 1187 Kang, H.M., Zaitlen, N.A., Wade, C.M., Kirby, A., Heckerman, D., Daly, M.J., and Eskin, E. (2008).  
1188 Efficient control of population structure in model organism association mapping. *Genetics* *178*,  
1189 1709–1723.
- 1190 Kang, H.M., Sul, J.H., Service, S.K., Zaitlen, N.A., Kong, S.-Y., Freimer, N.B., Sabatti, C., and Eskin,  
1191 E. (2010). Variance component model to account for sample structure in genome-wide  
1192 association studies. *Nat. Genet.* *42*, 348–354.
- 1193 Keele, G.R., Quach, B.C., Israel, J.W., Chappell, G.A., Lewis, L., Safi, A., Simon, J.M., Cotney, P.,  
1194 Crawford, G.E., Valdar, W., et al. (2020). Integrative QTL analysis of gene expression and  
1195 chromatin accessibility identifies multi-tissue patterns of genetic regulation. *PLOS Genet.* *16*,  
1196 e1008537.
- 1197 Keller, M.P., Gatti, D.M., Schueler, K.L., Rabaglia, M.E., Stapleton, D.S., Simecek, P., Vincent, M.,  
1198 Allen, S., Broman, A.T., Bacher, R., et al. (2018). Genetic Drivers of Pancreatic Islet Function.  
1199 *Genetics* *209*, 335–356.
- 1200 Keller, M.P., Rabaglia, M.E., Schueler, K.L., Stapleton, D.S., Gatti, D.M., Vincent, M., Mitok, K.A.,  
1201 Wang, Z., Ishimura, T., Simonett, S.P., et al. (2019). Gene loci associated with insulin secretion in  
1202 islets from nondiabetic mice. *J. Clin. Invest.* *129*, 4419–4432.
- 1203 Kimura, H., Caturegli, P., Takahashi, M., and Suzuki, K. (2015). New Insights into the Function of  
1204 the Immunoproteasome in Immune and Nonimmune Cells. *J. Immunol. Res.* *2015*, 1–8.
- 1205 Kumar, V., Kim, K., Joseph, C., Kourrich, S., Yoo, S.-H., Huang, H.C., Vitaterna, M.H., de Villena,  
1206 F.P.-M., Churchill, G., Bonci, A., et al. (2013). C57BL/6N mutation in cytoplasmic FMRP  
1207 interacting protein 2 regulates cocaine response. *Science* *342*, 1508–1512.
- 1208 Lippert, C., Listgarten, J., Liu, Y., Kadie, C.M., Davidson, R.I., and Heckerman, D. (2011). FaST  
1209 linear mixed models for genome-wide association studies. *Nat. Methods* *8*, 833–837.
- 1210 Liu, Y., Buil, A., Collins, B.C., Gillet, L.C., Blum, L.C., Cheng, L., Vitek, O., Mouritsen, J., Lachance,  
1211 G., Spector, T.D., et al. (2015). Quantitative variability of 342 plasma proteins in a human twin  
1212 population. *Mol. Syst. Biol.* *11*, 786.
- 1213 Lynch, M., and Walsh, B. (1998). *Genetics and Analysis of Quantitative Traits* (Sunderland, MA:  
1214 Sinauer Associates).
- 1215 MacKinnon, D.P., Fairchild, A.J., and Fritz, M.S. (2007). Mediation Analysis. *Annu. Rev. Psychol.*  
1216 *58*, 593–614.

- 1217 Marshall, R.S., and Vierstra, R.D. (2019). Dynamic Regulation of the 26S Proteasome: From  
1218 Synthesis to Degradation. *Front. Mol. Biosci.* 6.
- 1219 McAlister, G.C., Huttlin, E.L., Haas, W., Ting, L., Jedrychowski, M.P., Rogers, J.C., Kuhn, K., Pike,  
1220 I., Grothe, R.A., Blethrow, J.D., et al. (2012). Increasing the Multiplexing Capacity of TMTs Using  
1221 Reporter Ion Isotopologues with Isobaric Masses. *Anal. Chem.* 84, 7469–7478.
- 1222 McMullan, R.C., Kelly, S.A., Hua, K., Buckley, B.K., Faber, J.E., Pardo-Manuel de Villena, F., and  
1223 Pomp, D. (2016). Long-term exercise in mice has sex-dependent benefits on body composition  
1224 and metabolism during aging. *Physiol. Rep.* 4, e13011.
- 1225 Mogil, L.S., Andaleon, A., Badalamenti, A., Dickinson, S.P., Guo, X., Rotter, J.I., Johnson, W.C.,  
1226 Im, H.K., Liu, Y., and Wheeler, H.E. (2018). Genetic architecture of gene expression traits across  
1227 diverse populations. *PLOS Genet.* 14, e1007586.
- 1228 Morgan, A.P., and Welsh, C.E. (2015). Informatics resources for the Collaborative Cross and  
1229 related mouse populations. *Mamm. Genome* 26, 521–539.
- 1230 Mosedale, M., Kim, Y., Brock, W.J., Roth, S.E., Wiltshire, T., Scott Eaddy, J., Keele, G.R., Corty,  
1231 R.W., Xie, Y., Valdar, W., et al. (2017). Candidate Risk Factors and Mechanisms for Tolvaptan-  
1232 Induced Liver Injury Are Identified Using a Collaborative Cross Approach. *Toxicol. Sci.* 156,  
1233 kfw269.
- 1234 Mosedale, M., Cai, Y., Eaddy, J.S., Corty, R.W., Nautiyal, M., Watkins, P.B., and Valdar, W.  
1235 (2019). Identification of Candidate Risk Factor Genes for Human Idelalisib Toxicity Using a  
1236 Collaborative Cross Approach. *Toxicol. Sci.* 172, 265–278.
- 1237 Mulligan, M.K., Wang, X., Adler, A.L., Mozhui, K., Lu, L., and Williams, R.W. (2012). Complex  
1238 Control of GABA(A) Receptor Subunit mRNA Expression: Variation, Covariation, and Genetic  
1239 Regulation. *PLoS One* 7, e34586.
- 1240 Noll, K.E., Whitmore, A.C., West, A., McCarthy, M.K., Morrison, C.R., Plante, K.S., Hampton, B.K.,  
1241 Kollmus, H., Pilzner, C., Leist, S.R., et al. (2020). Complex Genetic Architecture Underlies  
1242 Regulation of Influenza-A-Virus-Specific Antibody Responses in the Collaborative Cross. *Cell*  
1243 *Rep.* 31, 107587.
- 1244 O’Brien, J.J., O’Connell, J.D., Paulo, J.A., Thakurta, S., Rose, C.M., Weekes, M.P., Huttlin, E.L.,  
1245 and Gygi, S.P. (2018). Compositional Proteomics: Effects of Spatial Constraints on Protein  
1246 Quantification Utilizing Isobaric Tags. *J. Proteome Res.* 17, 590–599.
- 1247 Orgel, K., Smeekens, J.M., Ye, P., Fotsch, L., Guo, R., Miller, D.R., Pardo-Manuel de Villena, F.,  
1248 Burks, A.W., Ferris, M.T., and Kulis, M.D. (2019). Genetic diversity between mouse strains  
1249 allows identification of the CC027/GeniUnc strain as an orally reactive model of peanut allergy.  
1250 *J. Allergy Clin. Immunol.* 143, 1027-1037.e7.
- 1251 Ori, A., Iskar, M., Buczak, K., Kastritis, P., Parca, L., Andrés-Pons, A., Singer, S., Bork, P., and  
1252 Beck, M. (2016). Spatiotemporal variation of mammalian protein complex stoichiometries.  
1253 *Genome Biol.* 17, 47.
- 1254 Pai, A.A., Cain, C.E., Mizrahi-Man, O., De Leon, S., Lewellen, N., Veyrieras, J.-B., Degner, J.F.,  
1255 Gaffney, D.J., Pickrell, J.K., Stephens, M., et al. (2012). The Contribution of RNA Decay

- 1256 Quantitative Trait Loci to Inter-Individual Variation in Steady-State Gene Expression Levels. *PLoS*  
1257 *Genet.* *8*, e1003000.
- 1258 Patterson, H.D., and Thompson, R. (1971). Recovery of Inter-Block Information when Block Sizes  
1259 are Unequal. *Biometrika* *58*, 545.
- 1260 Paulo, J.A., O’Connell, J.D., Everley, R.A., O’Brien, J., Gygi, M.A., and Gygi, S.P. (2016a).  
1261 Quantitative mass spectrometry-based multiplexing compares the abundance of 5000 *S.*  
1262 *cerevisiae* proteins across 10 carbon sources. *J. Proteomics* *148*, 85–93.
- 1263 Paulo, J.A., O’Connell, J.D., and Gygi, S.P. (2016b). A Triple Knockout (TKO) Proteomics Standard  
1264 for Diagnosing Ion Interference in Isobaric Labeling Experiments. *J. Am. Soc. Mass Spectrom.* *27*,  
1265 1620–1625.
- 1266 Philip, V.M., Sokoloff, G., Ackert-Bicknell, C.L., Striz, M., Branstetter, L., Beckmann, M. a,  
1267 Spence, J.S., Jackson, B.L., Galloway, L.D., Barker, P., et al. (2011). Genetic analysis in the  
1268 Collaborative Cross breeding population. *Genome Res.* *21*, 1223–1238.
- 1269 Picotti, P., Clément-Ziza, M., Lam, H., Campbell, D.S., Schmidt, A., Deutsch, E.W., Röst, H., Sun,  
1270 Z., Rinner, O., Reiter, L., et al. (2013). A complete mass-spectrometric map of the yeast  
1271 proteome applied to quantitative trait analysis. *Nature* *494*, 266–270.
- 1272 R Core Team (2018). RSoftware2018.
- 1273 Rasmussen, A.L., Okumura, A., Ferris, M.T., Green, R., Feldmann, F., Kelly, S.M., Scott, D.P.,  
1274 Safronetz, D., Haddock, E., LaCasse, R., et al. (2014). Host genetic diversity enables Ebola  
1275 hemorrhagic fever pathogenesis and resistance. *Science* *346*, 987–991.
- 1276 Rogala, A.R., Morgan, A.P., Christensen, A.M., Gooch, T.J., Bell, T.A., Miller, D.R., Godfrey, V.L.,  
1277 and de Villena, F.P.-M. (2014). The Collaborative Cross as a resource for modeling human  
1278 disease: CC011/Unc, a new mouse model for spontaneous colitis. *Mamm. Genome* *25*, 95–108.
- 1279 Romanov, N., Kuhn, M., Aebersold, R., Ori, A., Beck, M., and Bork, P. (2019). Disentangling  
1280 Genetic and Environmental Effects on the Proteotypes of Individuals. *Cell* *177*, 1308-1318.e10.
- 1281 Shorter, J.R., Najarian, M.L., Bell, T.A., Blanchard, M., Ferris, M.T., Hock, P., Kashfeen, A.,  
1282 Kirchoff, K.E., Linnertz, C.L., Sigmon, J.S., et al. (2019). Whole Genome Sequencing and Progress  
1283 Toward Full Inbreeding of the Mouse Collaborative Cross Population. *G3 (Bethesda)*. *9*, 1303–  
1284 1311.
- 1285 Sigmon, J.S., Blanchard, M.W., Baric, R.S., Bell, T.A., Brennan, J., Brockmann, G.A., Burks, A.W.,  
1286 Calabrese, J.M., Caron, K.M., Cheney, R.E., et al. (2020). Content and performance of the  
1287 MiniMUGA genotyping array, a new tool to improve rigor and reproducibility in mouse  
1288 research. *BioRxiv* 2020.03.12.989400.
- 1289 Skelly, D.A., Czechanski, A., Byers, C., Aydin, S., Spruce, C., Olivier, C., Choi, K., Gatti, D.M.,  
1290 Raghupathy, N., Stanton, A., et al. (2019). Genetic variation influences pluripotent ground state  
1291 stability in mouse embryonic stem cells through a hierarchy of molecular phenotypes. *BioRxiv*  
1292 552059.
- 1293 Smith, C.M., Proulx, M.K., Lai, R., Kiritsy, M.C., Bell, T.A., Hock, P., Pardo-Manuel de Villena, F.,

- 1294 Ferris, M.T., Baker, R.E., Behar, S.M., et al. (2019). Functionally Overlapping Variants Control  
1295 Tuberculosis Susceptibility in Collaborative Cross Mice. *MBio* *10*, 1–15.
- 1296 Srivastava, A., Morgan, A.P., Najarian, M.L., Sarsani, V.K., Sigmon, J.S., Shorter, J.R., Kashfeen,  
1297 A., McMullan, R.C., Williams, L.H., Giusti-Rodríguez, P., et al. (2017). Genomes of the mouse  
1298 collaborative cross. *Genetics* *206*, 537–556.
- 1299 Storey, J.D., Bass, A.J., Dabney, A., and Robinson, D. (2019). qvalue: Q-value estimation for false  
1300 discovery rate control.
- 1301 Suhre, K., McCarthy, M.I., and Schwenk, J.M. (2020). Genetics meets proteomics: perspectives  
1302 for large population-based studies. *Nat. Rev. Genet.*
- 1303 Svenson, K.L., Gatti, D.M., Valdar, W., Welsh, C.E., Cheng, R., Chesler, E.J., Palmer, A. a,  
1304 McMillan, L., and Churchill, G. a (2012). High-resolution genetic mapping using the Mouse  
1305 Diversity outbred population. *Genetics* *190*, 437–447.
- 1306 Szklarczyk, D., Gable, A.L., Lyon, D., Junge, A., Wyder, S., Huerta-Cepas, J., Simonovic, M.,  
1307 Doncheva, N.T., Morris, J.H., Bork, P., et al. (2019). STRING v11: protein–protein association  
1308 networks with increased coverage, supporting functional discovery in genome-wide  
1309 experimental datasets. *Nucleic Acids Res.* *47*, D607–D613.
- 1310 Taggart, J.C., Zauber, H., Selbach, M., Li, G.-W., and McShane, E. (2020). Keeping the  
1311 Proportions of Protein Complex Components in Check. *Cell Syst.* *10*, 125–132.
- 1312 Valdar, W., Holmes, C.C., Mott, R., and Flint, J. (2009). Mapping in structured populations by  
1313 resample model averaging. *Genetics* *182*, 1263–1277.
- 1314 Vinayagam, A., Hu, Y., Kulkarni, M., Roesel, C., Sopko, R., Mohr, S.E., and Perrimon, N. (2013).  
1315 Protein complex-based analysis framework for high-throughput data sets. *Sci. Signal.* *6*, 1–12.
- 1316 Wang, Y., Yang, F., Gritsenko, M.A., Wang, Y., Clauss, T., Liu, T., Shen, Y., Monroe, M.E., Lopez-  
1317 Ferrer, D., Reno, T., et al. (2011). Reversed-phase chromatography with multiple fraction  
1318 concatenation strategy for proteome profiling of human MCF10A cells. *Proteomics* *11*, 2019–  
1319 2026.
- 1320 Wei, J., and Xu, S. (2016). A random-model approach to QTL mapping in multiparent advanced  
1321 generation intercross (MAGIC) populations. *Genetics* *202*, 471–486.
- 1322 Williams, E.G., Wu, Y., Jha, P., Dubuis, S., Blattmann, P., Argmann, C.A., Houten, S.M., Amariuta,  
1323 T., Wolski, W., Zamboni, N., et al. (2016). Systems proteomics of liver mitochondria function.  
1324 *Science* (80-. ). *352*, aad0189–aad0189.
- 1325 Wu, Y., Williams, E.G., Dubuis, S., Mottis, A., Jovaisaite, V., Houten, S.M., Argmann, C.A., Faridi,  
1326 P., Wolski, W., Kutalik, Z., et al. (2014). Multilayered Genetic and Omics Dissection of  
1327 Mitochondrial Activity in a Mouse Reference Population. *Cell* *158*, 1415–1430.
- 1328 Yang, H., Bell, T.A., Churchill, G.A., and Pardo-Manuel de Villena, F. (2007). On the subspecific  
1329 origin of the laboratory mouse. *Nat. Genet.* *39*, 1100–1107.
- 1330 Yang, H., Wang, J.R., Didion, J.P., Buus, R.J., Bell, T.A., Welsh, C.E., Bonhomme, F., Yu, A.H.-T.,  
1331 Nachman, M.W., Pialek, J., et al. (2011). Subspecific origin and haplotype diversity in the

- 1332 laboratory mouse. *Nat. Genet.* *43*, 648–655.
- 1333 Yu, G., Wang, L.-G., Han, Y., and He, Q.-Y. (2012). clusterProfiler: an R Package for Comparing  
1334 Biological Themes Among Gene Clusters. *Omi. A J. Integr. Biol.* *16*, 284–287.
- 1335 Zhang, J., Teh, M., Kim, J., Eva, M.M., Cayrol, R., Meade, R., Nijnik, A., Montagutelli, X., Malo, D.,  
1336 and Jaubert, J. (2019). A Loss-of-Function Mutation in the Integrin Alpha L ( Itgal ) Gene  
1337 Contributes to Susceptibility to Salmonella enterica Serovar Typhimurium Infection in  
1338 Collaborative Cross Strain CC042. *Infect. Immun.* *88*, 1–19.
- 1339 Zhou, X., and Stephens, M. (2012). Genome-wide efficient mixed-model analysis for association  
1340 studies. *Nat. Genet.* *44*, 821–824.
- 1341
- 1342



## Genetically diverse mouse populations

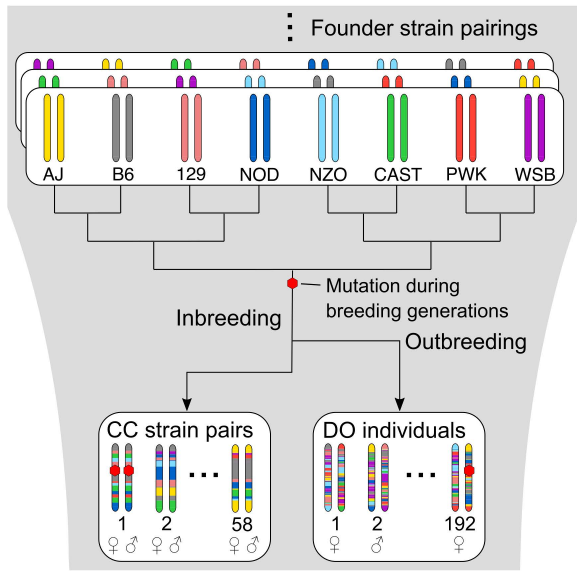

## Liver proteomics data

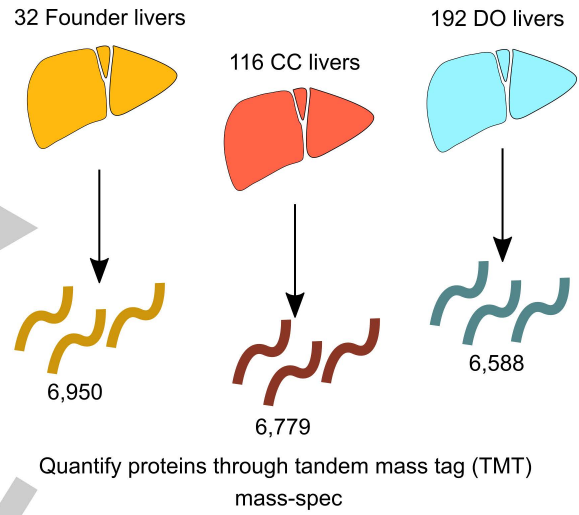

## Proteomics/genetics analysis

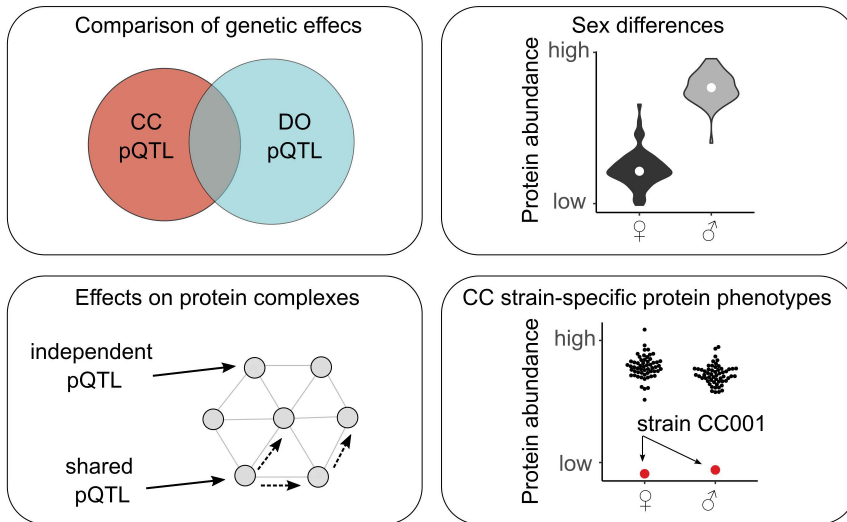

Graphical abstract

1343  
1344

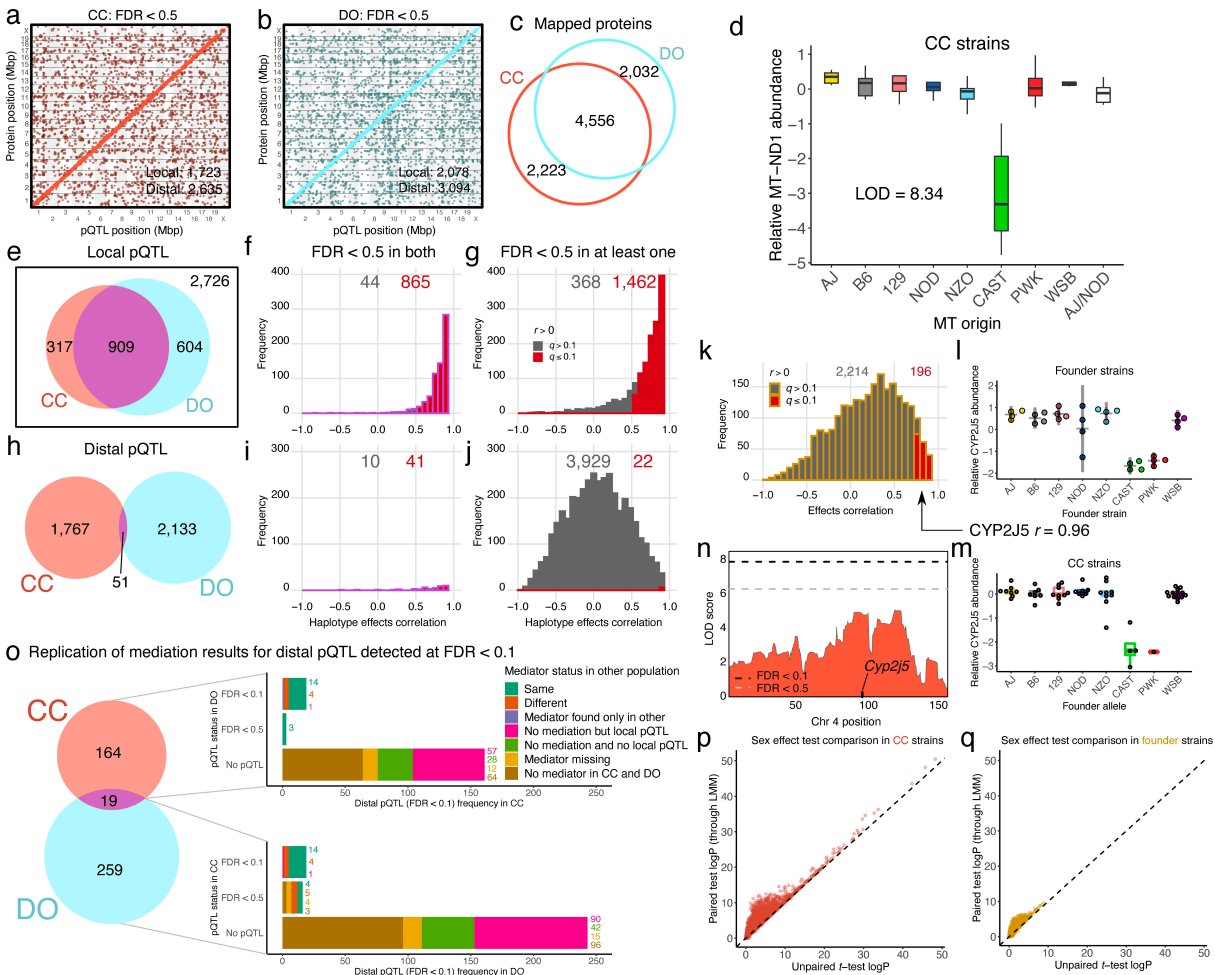

1345  
1346  
1347  
1348  
1349  
1350  
1351  
1352  
1353  
1354  
1355  
1356  
1357  
1358  
1359  
1360  
1361  
1362  
1363  
1364  
1365  
1366  
1367  
1368  
1369  
1370

**Figure S1. Comparison of lenient mapping results, mediation candidates, and sex effects among genetically diverse mouse populations, related to Figures 1 and 2.** Leniently detected (FDR < 0.5) pQTL are plotted by the genomic position of protein against their coordinate. Dot size is proportional to association strength (LOD score). (c) Venn diagram of the overlap of analyzed proteins between the CC and DO. (d) A local pQTL was detected in the CC for *mt-Nd1*, a gene encoded on the mitochondrial genome. The pQTL is characterized by low MT-ND1 in CC strains with the CAST mitochondrial genome. For six CC strains, mitochondrial inheritance was ambiguous between AJ and NOD (white boxplot). (e) Venn diagram of the overlap in local pQTL detected in the CC and DO. (f) The haplotype effects of local pQTL detected in both populations are highly consistent, as measured by the correlation coefficient comparing the effects in the CC and DO. (g) More local pQTL are consistent between the populations when also considering pQTL detected in only one of them. Red bars represent pQTL that had significantly correlated effects (FDR < 0.1). (h) Venn diagram of overlap of distal pQTL detected in the CC and DO. (i) Using lenient detection resulted in more distal pQTL in both populations with consistent haplotype effects (41 out of 51). (j) In contrast to local genetic effects, considering distal pQTL that were leniently detected in only one of the populations resulted in many inconsistent effects comparisons, likely representing false positives or subtle distal effects specific to one population. The founder strains can reveal under-powered local pQTL in the CC (and DO), as revealed by the correlations between haplotype effects at putative local pQTL for genes with rare alleles in the CC ( $\leq 3$  CC strains) and that did not have a local pQTL detected (FDR < 0.5) and strain effects in mice from the founder strains (k). The enrichment in positive correlations suggests the founders can provide additional information for detecting local pQTL in the CC. The gene *Cyp2j5* had significant correlation ( $r = 0.96$ ) between the strain effects in the (l) founder strains with the (m) local haplotype effects in the CC, characterized by low CAST and PWK effects. Mean and  $\pm 2$  standard deviation bars are shown for the founder strains, and boxplots for CC strains. Four CC strains possessed the CAST allele and only one had the PWK allele, resulting in (n) poor power to detect the local pQTL of *Cyp2j5*. Stringent and lenient significance thresholds are included as horizontal black and gray dashed lines, respectively. (o) Comparison of mediation results for distal pQTL stringently detected (FDR < 0.1) in at least one of the populations. For distal pQTL detected stringently in both populations, mediation results were strongly consistent (14 out of 19). If the distal pQTL were detected leniently in the other population, mediation was still somewhat consistent (7 out of 19). When the distal pQTL was not detected in the other population, often no mediator was detected, or the candidate mediator was missing from the other

1371 population. Observance of both sexes within the (p) CC and (q) founder strains improves power to detect sex effects. The -  
1372  $\log_{10}$ (p-value), or logP, from a linear mixed effect model (LMM) that takes into account strain replicates compared to the logP  
1373 from an unpaired t-test. The lower logP in the founder strains reflects the overall smaller sample size (32 mice compared to 116  
1374 in the CC). Dashed diagonal lines included for reference.

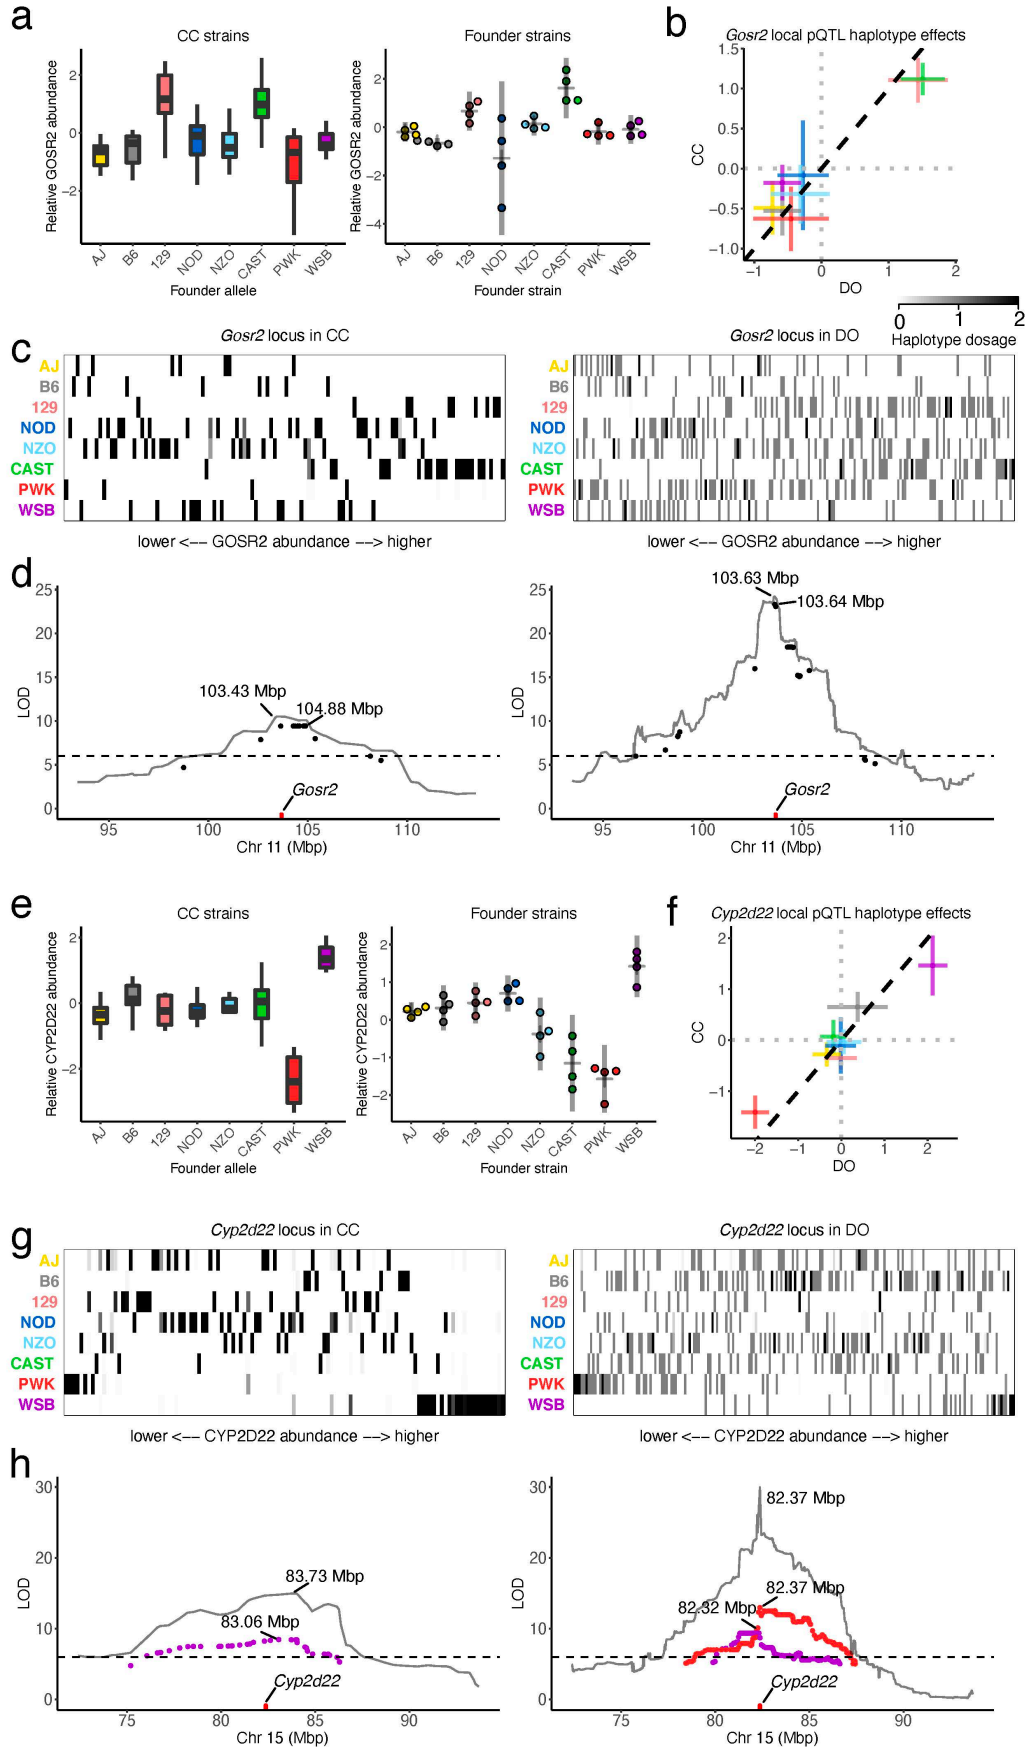

1376 **Figure S2. Highly consistent local pQTL effects across the CC, DO, and founder strains, related to Figure 2.** Local pQTL for (a)  
1377 *Gosr2* and (e) *Cyp2d22* have highly consistent effects across the CC (left) and founder strains (right). Boxplots are shown for the  
1378 CC strains and mean  $\pm$  2 standard deviation bars for the founder strains. The local pQTL effects are also highly consistent  
1379 between the CC and DO, both in terms of modeled effects and the actual data – for (b, c) *Gosr2* and (f, g) *Cyp2d22*. For  
1380 comparisons of modeled effects (b, f), intervals represent  $\pm$  standard error bars. Dashed diagonal lines included for reference.  
1381 To visualize the effects in the actual data (c, g), the CC and DO data at the pQTL are represented as heatmaps with rows  
1382 indicating founder allele dosage at the local pQTL (expected allele counts) and columns indicating individual mice, ordered by  
1383 protein abundance. Clusters in rows towards the left or right sides represent founder haplotype effects, such as the high WSB  
1384 effect in *Cyp2d22*. Haplotype-based association scans at the pQTL are overlaid with variant associations for (d) *Gosr2* and (h)  
1385 *Cyp2d22*. When the pQTL effects are approximately bi-allelic, as with *Gosr2* (d), the peak variant association and haplotype-  
1386 based association are very close, consistent with a single variant largely driving the pQTL. Variants with an allele shared by only  
1387 129 and CAST, matching the effects pattern, are shown. When the effects were more complex than bi-allelic, as with *Cyp2d22*  
1388 (h), there are likely multiple causal variants, and haplotype-based association produces higher scores of association. WSB- and  
1389 PWK-private variants with LOD > 6 were included for *Cyp2d22*, highlighting LD blocks that potentially carry founder-specific  
1390 variants driving their extreme effects. The larger sample size and finer mapping resolution of the DO sample are evident in the  
1391 high LOD scores and narrower association peaks. Genomic positions of peak associations from variant- and haplotype-based  
1392 mapping are marked. Horizontal dashed lines at LOD of 6 included as reference.

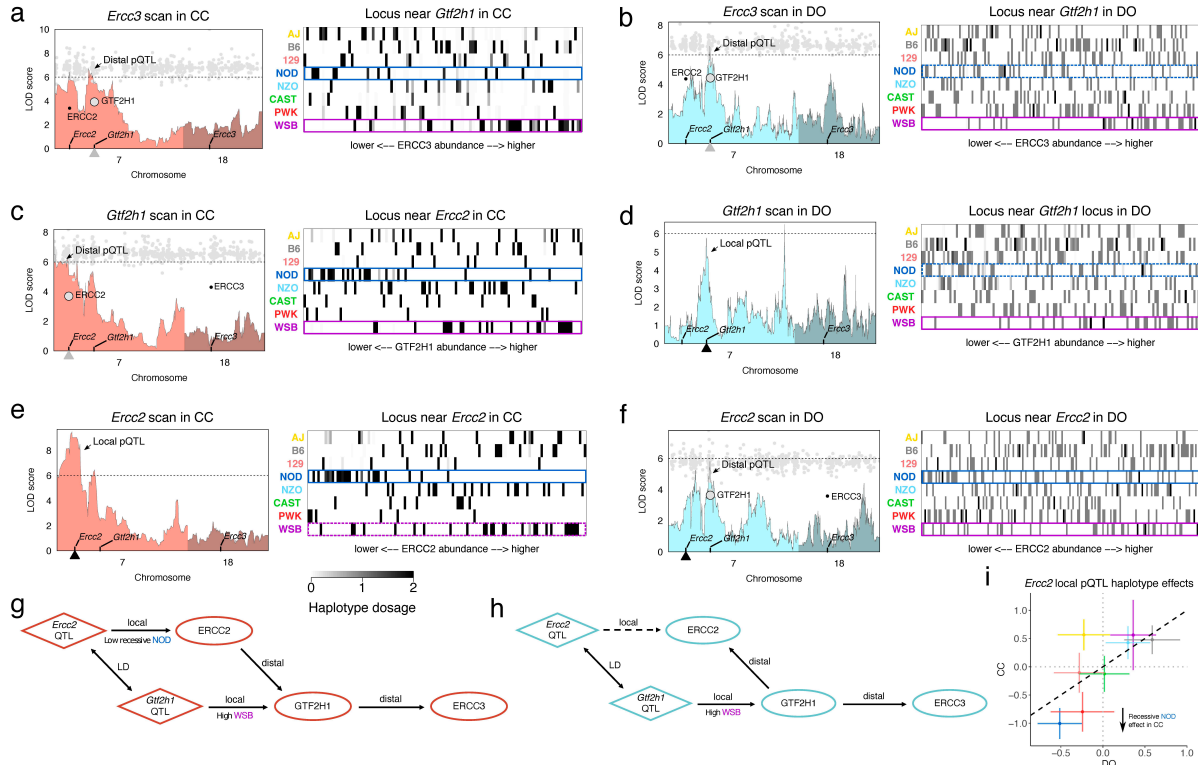

1393  
1394  
1395  
1396  
1397  
1398  
1399  
1400  
1401  
1402  
1403  
1404  
1405  
1406  
1407  
1408  
1409  
1410

**Figure S3. Similarity and differences in the genetic effects on *Ercc3* between the CC and DO, related to Figure 2.** Suggestive distal pQTL for *Ercc3* map to chromosome 7 in both the (a) CC and (b) DO, consisting of two peaks above *Ercc2* and *Gtf2h1*, genes that are approximately 30 Mbp apart and known to interact with ERCC3. Mediation analysis identified GTF2H1 and ERCC2 as candidate drivers of the *Ercc3* pQTL. Gray dots represent mediation scores for all quantified proteins on chromosomes 7 and 18. Horizontal dashed lines at LOD of 6 included for reference. To better understand the pQTL effects, the founder haplotype inheritance was plotted as heatmaps with founder allele dosage (expected allele counts) as rows and individual mice as columns, ordered by ERCC3 abundance, at the chromosome 7 locus near *Gtf2h1*. A low NOD effect was observed, indicated by the dark blue box, which was weak to non-existent in the DO (dotted dark blue box), as well as a high WSB effect in both the CC and DO (purple boxes). (c) In the CC, *Gtf2h1* has a weak distal pQTL that mapped nearby *Ercc2* and was mediated by ERCC2 with similar low NOD and high WSB effects. (d) In the DO, *Gtf2h1* has a suggestive local pQTL (LOD < 6) and notably no suggestive association near *Ercc2*. (e) *Ercc2* has a strong local pQTL in the CC (FDR < 0.1), driven by a low NOD effect, whereas in the (f) DO, a suggestive distal pQTL is observed near *Gtf2h1*. Diagrams for the relationships defined by pQTL and mediation in the (g) CC and (h) DO. In both populations, *Ercc2* and/or *Gtf2h1* affect ERCC3 abundance, and potentially each other as well. Teasing apart the directionality of effects is further complicated by the linkage disequilibrium (LD) between *Ercc2* and *Gtf2h1*. The low NOD effect at the *Ercc2* locus is stronger in the CC, and the high WSB effect is strongest at the *Gtf2h1* locus. (i) The haplotype effects at the locus near *Ercc2* are relatively similar, though the NOD effect is more extreme in the inbred CC background. Intervals represent  $\pm$  standard error bars. Dashed diagonal line included for reference.

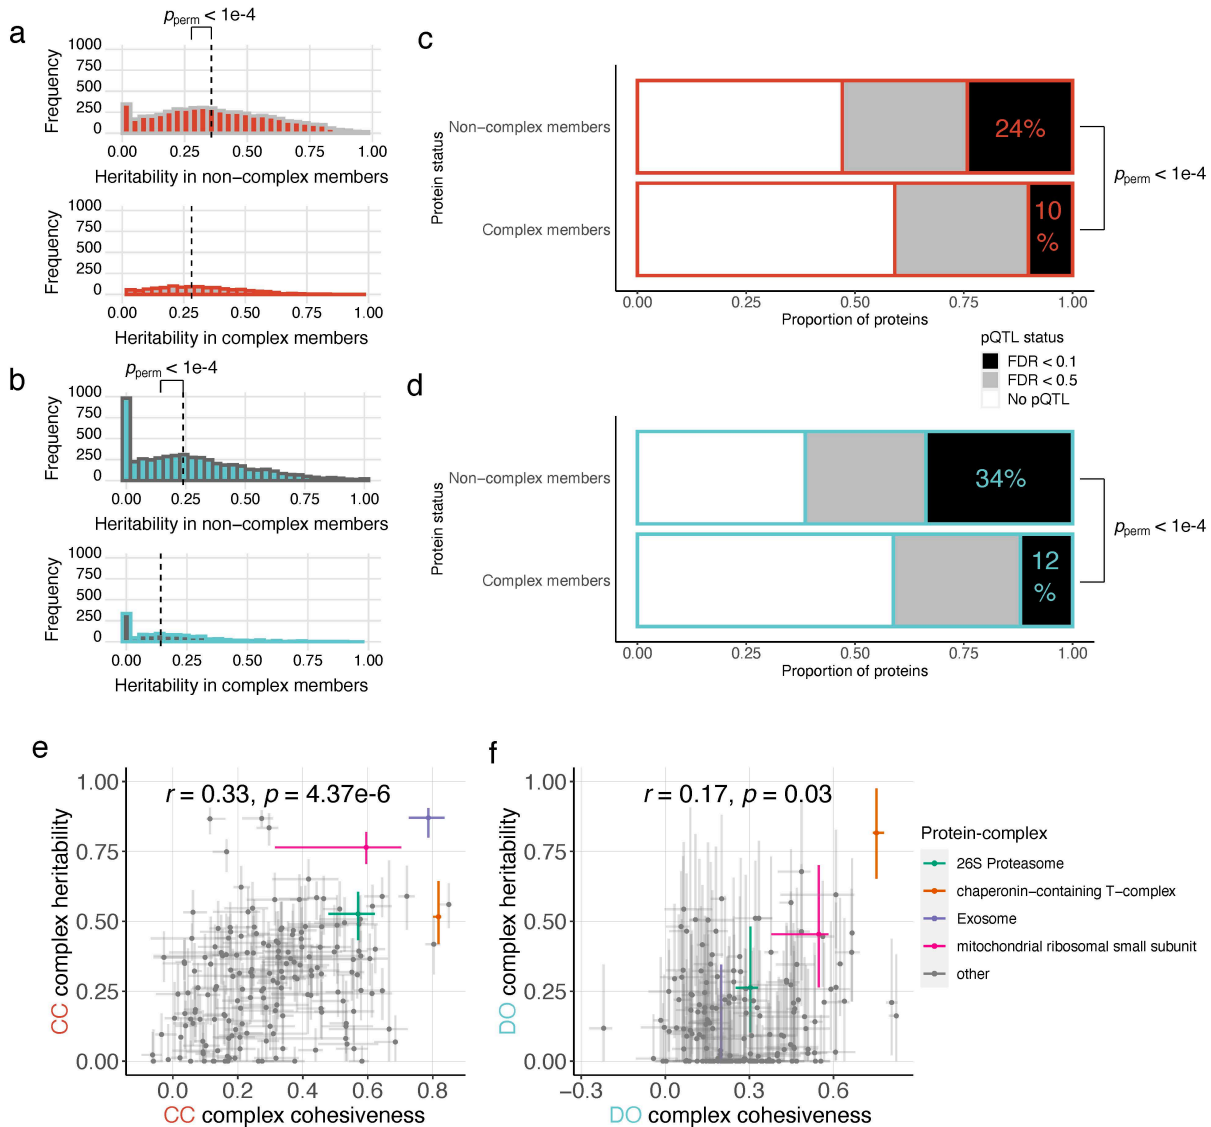

1411  
 1412 **Figure S4. Comparatively fewer detected genetic effects on protein-complex members, and the correlation between protein-**  
 1413 **complex heritability and cohesiveness, related to Figures 3, 4, 5, and 6.** Histograms of the heritability of proteins that are not  
 1414 annotated as members of a protein-complex (top) and that are members (bottom) in the (a) CC and (b) DO. Vertical dashed line  
 1415 represents the median heritability, which were significantly different ( $p_{perm} < 1e-4$ ). A lower proportion of proteins that are  
 1416 members of protein-complexes possess pQTL ( $p_{perm} < 1e-4$ ) in both the (c) CC and (d) DO. Black boxes represent stringently  
 1417 detected (FDR < 0.1) pQTL, gray boxes represent leniently detected (FDR < 0.5) pQTL, and white boxes represent proteins that  
 1418 had no pQTL detected. Numbers represent the percentage of proteins with detected pQTL at FDR < 0.1 within each category.  
 1419 The correlation between protein-complex heritability and cohesiveness is stronger in the (e) CC ( $r = 0.33, p = 4.37e-6$ ) than the  
 1420 (f) DO ( $r = 0.17, p = 0.03$ ). For protein-complex cohesiveness, points and bars represent medians and interquartile ranges,  
 1421 respectively. Protein-complex heritability was estimated from the first principal component (PC1) of the complex members, and  
 1422 bars represent 95% subsample intervals around the estimate. Exosome, chaperonin-containing T-complex, 26S Proteasome,  
 1423 and the mitochondrial ribosomal small subunit are highlighted and are examined in detail (Figures 4, 5, 6, S5, & S6).

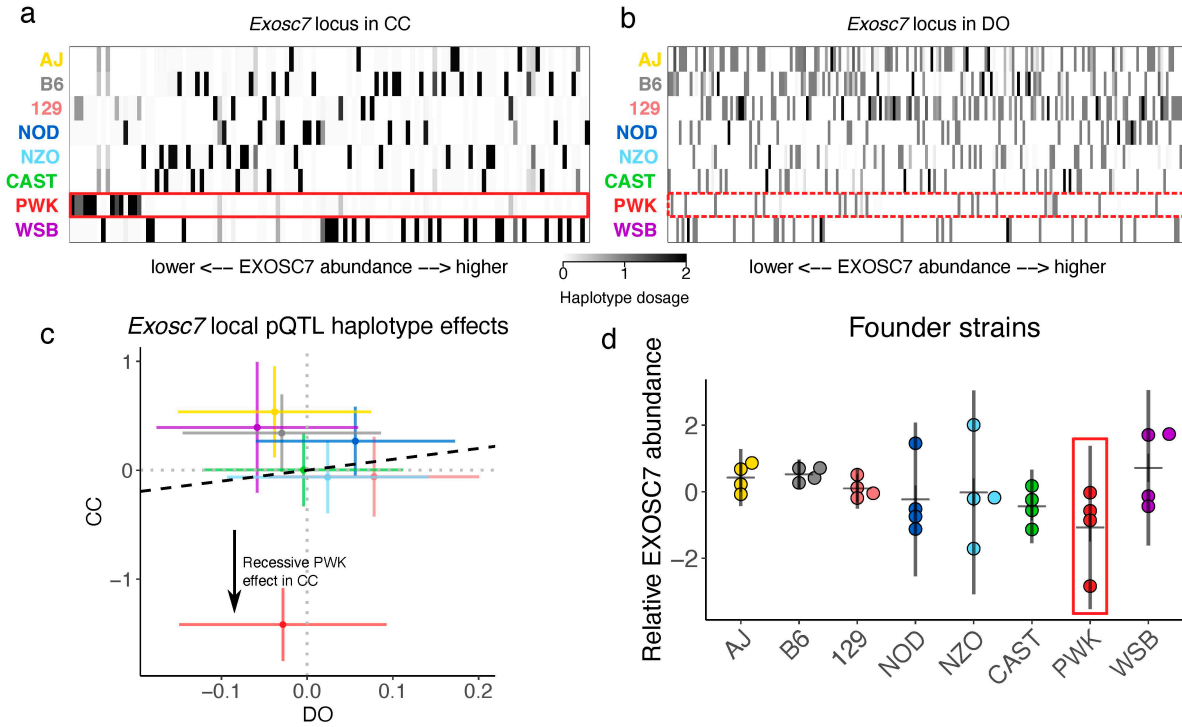

1424  
1425  
1426  
1427  
1428  
1429  
1430  
1431  
1432  
1433  
1434  
1435

**Figure S5. A local recessive effect on EXOSC7 that impacts the whole exosome is exposed by the inbred genomes of the CC strains, related to Figure 4.** The founder haplotype inheritance at the *Exosc7* local pQTL represented as a heatmap with founder allele dosages (expected allele counts) as rows and individuals as the columns, ordered by EXOSC7 abundance, for the (a) CC and (b) DO. The cluster on the left side in the PWK row (red box) for the CC reflects the low EXOSC7 abundance observed in CC mice that are homozygous for the PWK allele at the locus. No homozygotes for PWK were observed in the DO, and the heterozygous PWK carriers do not have low EXOSC7 abundance (dotted red box). (c) Comparison of the modeled allele effects at the *Exosc7* locus reveal a marked lower PWK effect specific to the CC, which is consistent with the effects of a recessive allele. Intervals represent  $\pm$  standard error bars. Dashed diagonal line included for reference. (d) Mice from the PWK strain with low EXOSC7 abundance were observed, though the effect is not as distinct as in the CC, possibly due to decreased accuracy without a bridge sample and the relative nature of the mass-spec quantification. Founder strain mice are summarized with mean  $\pm$  2 standard deviation bars.



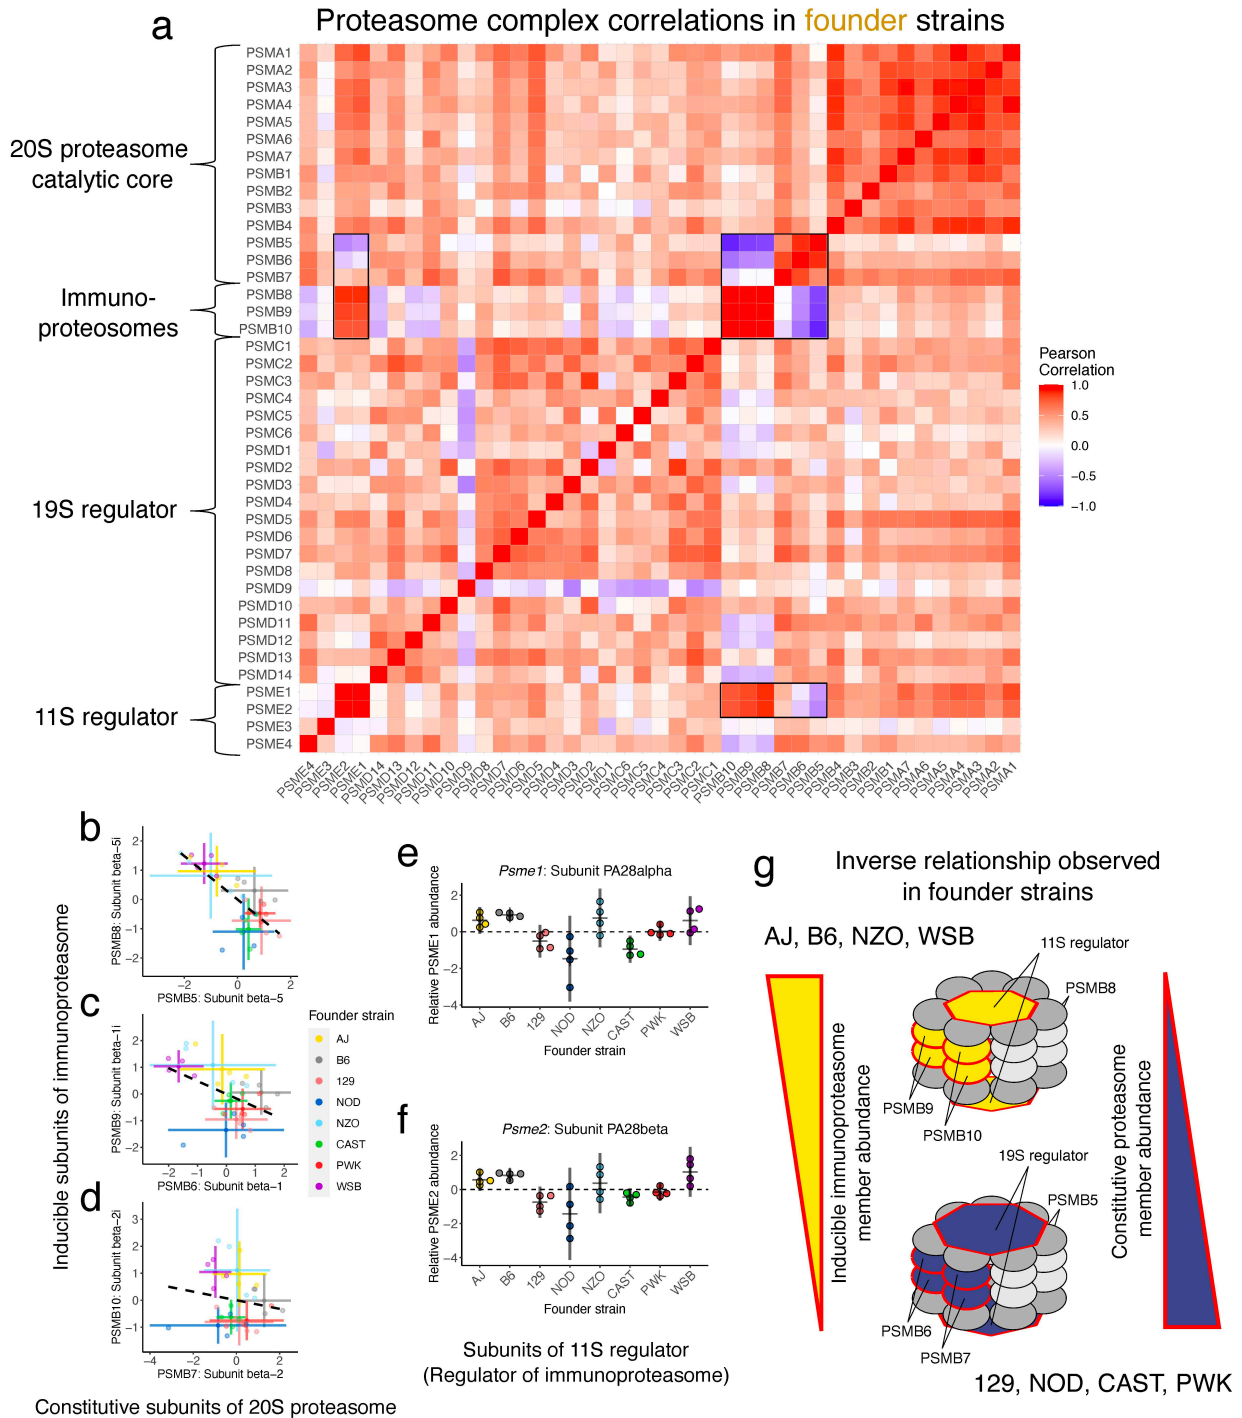

**Figure S6. The founder strains differ in the balance between the constitutive proteasome and the inducible immunoproteasome, related to Figure 6.** The correlation pattern among members of the 26S proteasome in the founder strains matches closely with those observed in the CC and DO (Figure 6a & b). The constitutive members of the 20S proteasome (PSMB5, PSMB6, and PSMB7) are anti-correlated with the corresponding inducible immunoproteasome components (PSMB8, PSMB9, and PSMB10) and the subunits from the 11S regulator – the regulator complex specific to the immunoproteasome – highlighted with black boxes. Founder strains with high abundance of the constitutive proteasome members have low levels of immunoproteasome proteins, and vice versa. The direction of this relationship depends on genetic factors, as revealed by the founder strains, with WSB and AJ mice consistently possessing relatively high abundance of immunoproteasome members and

1445 low abundance of the corresponding constitutive members: (b) PSMB8 vs PSMB5, (c) PSMB9 vs PSMB6, and (d) PSMB10 vs  
1446 PSMB7. Intervals represent mean  $\pm$  2 standard deviation bars. Dashed lines represent the best fit line between corresponding  
1447 inducible and constitutive subunits. Two of the proteins from the 11S regulator of the immunoproteasome, (e) PSME1 and (f)  
1448 PSME2, have matching abundance in AJ, B6, NZO, and WSB mice as in the inducible immunoproteasome components, which is  
1449 largely consistent with joint regulation of constitutive/inducible members (g). The WSB mice are consistent with genetic  
1450 variation identified through QTL mapping near *Psmb9* that drives PSMB9 and indirectly PSMB6 abundance relative to each  
1451 other in the recombinant CC and DO populations (**Figure 6i-l**). Founder strain mice are summarized with mean  $\pm$  2 standard  
1452 deviation bars. Horizontal dashed lines provide reference at 0 for 11S regulator proteins.

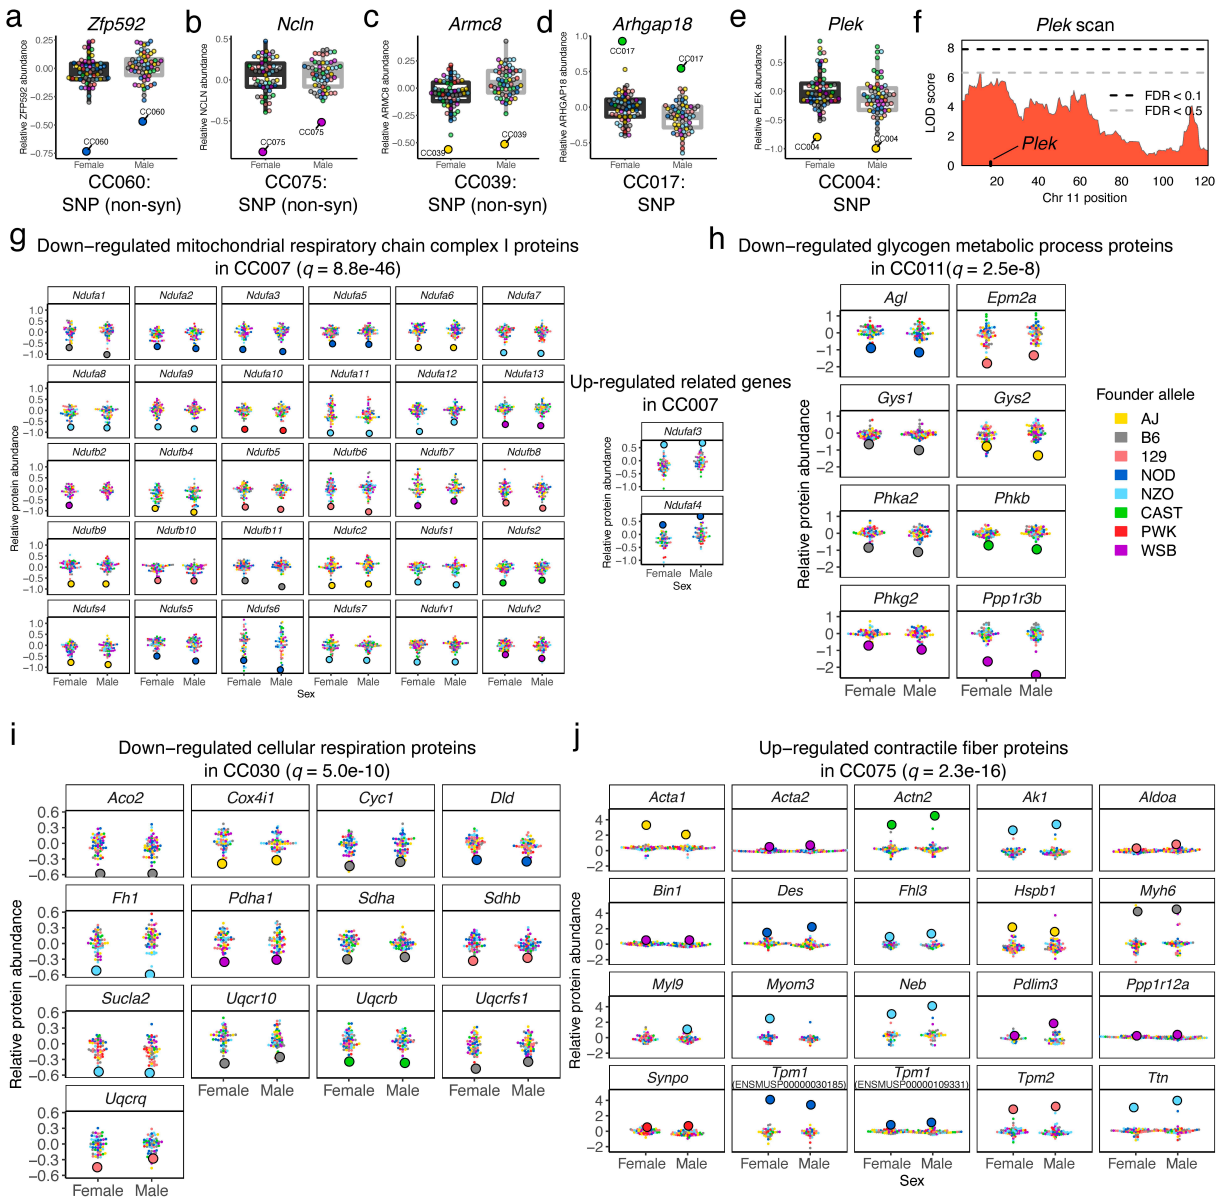

1453  
1454  
1455  
1456  
1457  
1458  
1459  
1460  
1461  
1462  
1463  
1464  
1465  
1466  
1467  
1468  
1469  
1470

**Figure S7. Proteins with extreme abundance in CC strains that possess unique local variants, and CC strains with extreme protein abundance patterns in functional pathways, related to Figure 7.** Mutations became fixed in CC strains and were previously identified (Srivastava et al., 2017). These private variants of CC strains potentially have local effects on protein abundance. Examples include (a) *Zfp952*, (b) *Ncln*, (c) *Armc8*, (d) *Arhgap18*, and (e) *Plek*. *Zfp952*, *Ncln*, and *Armc8* each possess a non-synonymous SNP variant in a CC strain which had strikingly low protein abundance. These variants may cause reduced abundance, but alternatively, they may represent a coding polymorphism in the quantified peptides, resulting in false low abundance due to the allele-specific nature of mass-spec quantification. The color or the dots indicates the founder allele at the gene. Strain-specific variants associated with high abundance at the local protein were also observed, such as high ARHGAP18 abundance in CC017. (e) A novel SNP allele in CC004 at *Plek* was associated with low abundance, potentially representing a new allele at a gene that already possessed local genetic variation from the founder strains that drove a (f) suggestive local pQTL. Stringent and lenient significance thresholds are included as horizontal black and gray dashed lines, respectively. CC strain-specific sets of proteins with extreme abundance were identified that were significantly enriched in GO and KEGG functional terms. (g) CC007 possessed distinctly low abundance of mitochondrial respiratory chain complex I proteins, as well as high abundance in two assembly factor proteins from the complex, NDUFAF3 and NDUFAF4, suggesting compensatory mechanisms may be occurring at the complex in the strain. Large dots represent the CC strain with extreme protein abundance. Other detected CC strain-specific protein dynamics include low abundance of (h) glycogen metabolic process proteins for CC0011, (i) cellular respiration proteins for CC030, and (j) high abundance of contractile fiber proteins for CC075.
